# Supplementary material for: Fe(iii)-Catalyzed synthesis of steroidal imidazoheterocycles as potent antiproliferative agents
Source: Royal Society of Chemistry journal article supplement (doi:10.1039/d0ob01241f), 2020-01-01
Supplement: d0ob01241f1.pdf [file d0ob01241f1.pdf]

## Fe(III)-Catalyzed synthesis of steroidal imidazoheterocycles as potent antiproliferative agents

Sadhanendu Samanta,<sup>a</sup> Asim Kumar Ghosh,<sup>a</sup> Sumit Ghosh,<sup>a</sup> Anastasia A. Ilina,<sup>b</sup> Yulia A. Volkova,<sup>b</sup> Igor V. Zavarzin,<sup>b</sup> Alexander M. Scherbakov,<sup>c</sup> Diana I. Salnikova,<sup>c,d</sup> Yaraslau U. Dzichenka,<sup>e</sup> Anton B. Sachenko,<sup>e</sup> Valerii Z. Shirinian\*<sup>b</sup> and Alakananda Hajra\*<sup>a</sup>

<sup>a</sup> *Department of Chemistry, Visva-Bharati (A Central University), Santiniketan, 731235, West Bengal, India.*

<sup>b</sup> *N.D. Zelinsky Institute of Organic Chemistry, Russian Academy of Sciences, 47 Leninsky prosp., 119991 Moscow, Russia*

<sup>c</sup> *Department of Experimental Tumor Biology, N.N. Blokhin National Medical Research Center of Oncology, 24 Kashirskoe shosse, 115522 Moscow, Russia*

<sup>d</sup> *Lomonosov Moscow State University, Faculty of Medicine, Moscow 119192, 27 Lomonosova prosp.*

<sup>e</sup> *Institute of Bioorganic Chemistry of NAS of Belarus, Laboratory of Protein Engineering, Academician V.F. Kuprevich str. 5/2, Minsk, Republic of Belarus*

*E-mail: [alakananda.hajra@visva-bharati.ac.in](mailto:alakananda.hajra@visva-bharati.ac.in)*

### Table of Contents

| <b>Content</b>                                        | <b>Page no.</b> |
|-------------------------------------------------------|-----------------|
| 1. General Information.....                           | S2              |
| 2. Experimental procedure .....                       | S2-S3           |
| 3. Characterization data for the synthesized products | S3-S10          |
| 4. Biology.....                                       | S10-S11         |
| 5. References.....                                    | S12             |
| 6. NMR spectra for the synthesized products.....      | S13-S54         |

## 1. General Information:

NMR spectra were acquired on Bruker Avance 600, 500, 300 spectrometers at room temperature; the chemical shifts  $\delta$  were measured in ppm relative to the solvent ( $^1\text{H}$ :  $\text{CDCl}_3$ ,  $\delta = 7.27$  ppm;  $^{13}\text{C}$ :  $\text{CDCl}_3$ ,  $\delta = 77.00$  ppm). Splitting patterns are designated as s, singlet; d, doublet; t, triplet; q, quartet; m, multiplet; dd, double doublet; ddd, double double doublet. The coupling constants ( $J$ ) are in Hertz. High-resolution and accurate mass spectra were obtained on Bruker microTOF-QTM ESI-TOF (Electrospray Ionization/Time of Flight) and Thermo Scientific\* LTQ Orbitrap mass spectrometers. Melting points (mp) are uncorrected and were measured on a Boetius capillary melting point apparatus. Analytical thin layer chromatography (TLC) was carried out on silica gel plates (silica gel 60 F254 aluminum supported plates); the visualization was accomplished with an UV lamp (365 nm) and using chemical staining with  $[\text{Ce}(\text{SO}_4)_2/\text{H}_2\text{SO}_4]$ . Column chromatography was performed on silica gel 60 (230-400 mesh, Merck). 2-Aminopyridines, 2-aminobenzothiazole, and steroids were commercially available and were used without purification. Iron salt (>97%, Lot SZBA0890 and >99.99%, Lot # MKBL0105V) was purchased from Sigma Aldrich. All reactions were carried out using freshly distilled and dry solvents. All reactions involving moisture sensitive reactants were executed using oven dried glassware.

## 2. Experimental procedures:

### Typical experimental procedure for the synthesized compounds (3aa-3cb):

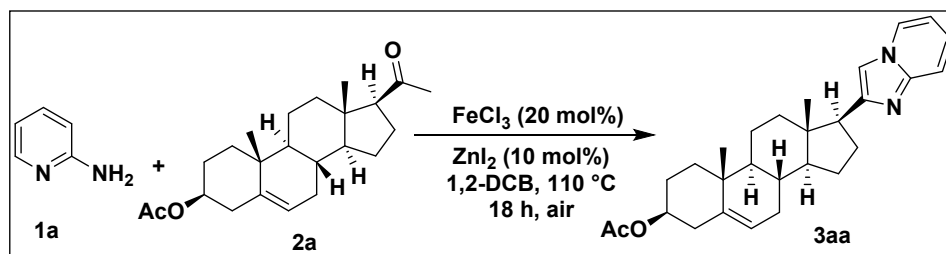

A mixture of 2-aminopyridine (0.24 mmol, 22.5 mg) (**1a**), pregnenolone acetate (**2a**) (0.2 mol, 71.7 mg) was taken in an oven dried reaction tube. Then 1,2-dichlorobenzene (2 mL) was added to it and stirred at room temperature for few seconds. Then zinc iodide (0.10 mmol, 7 mg) and iron(III) chloride (0.20 mmol, 6 mg) was added to it and stirred at  $110\text{ }^\circ\text{C}$  for 18 hours. After completion of the reaction (TLC) it was cooled to room temperature and extracted with dichloromethane. The organic phase was dried over anhydrous  $\text{Na}_2\text{SO}_4$ . The crude residue was

obtained after evaporating the solvent in vacuum and was purified by column chromatography on silica gel using a mixture petroleum ether and ethyl acetate (60:40) as an eluting solvent to afford the pure product (**3aa**) (69 mg, 81%) as a yellow solid.

### 3. Characterization data for the synthesized products:

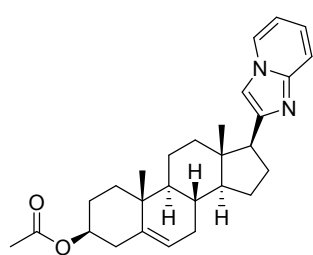

#### *17β-(Imidazo[1',2'-a]pyridine)-3β-acetoxy-androst-5-ene (3aa):*

Yield 69 mg (81%, 0.2 mmol); yellow solid; mp 156-158 °C;  $R_f$  = 0.06 (petroleum ether – EtOAc, 3:1);  $^1\text{H NMR}$  (300 MHz,  $\text{CDCl}_3$ ):  $\delta$  8.06 (d,  $J$  = 6.8 Hz, 1H, Ar), 7.58 (d,  $J$  = 9.0 Hz, 1H, Ar), 7.37 (s, 1H, Ar), 7.11 (dd,  $J$  = 6.8, 9.0 Hz, 1H, Ar), 6.72 (dd,  $J$  = 6.8, 6.8 Hz, 1H, Ar), 5.42 (m, 1H, 6-CH), 4.71 – 4.53 (m, 1H, 3 $\alpha$ -CH), 2.88 (t,  $J$  = 9.8 Hz, 1H, 17 $\alpha$ -CH), 2.43 – 2.07 (m, 5H), 2.05 (s, 3H, 3-OCOCH<sub>3</sub>), 2.00 – 1.06 (m, 14H), 1.03 (s, 3H, 19-CH<sub>3</sub>), 0.57 (s, 3H, 18-CH<sub>3</sub>);  $^{13}\text{C NMR}$  (75 MHz,  $\text{CDCl}_3$ ):  $\delta$  170.6, 148.5, 144.8, 139.9, 125.2, 123.7, 122.6, 117.3, 111.7, 109.6, 74.0, 56.4, 50.9, 50.4, 44.0, 38.2, 38.1, 37.2, 36.8, 32.5, 32.1, 27.9, 26.6, 24.8, 21.5, 20.9, 19.4, 13.2; IR (KBr): 2942, 2903, 1731, 1375, 1364, 1248, 1032, 756, 736  $\text{cm}^{-1}$ ; HRMS (ESI):  $m/z$  calcd for  $\text{C}_{28}\text{H}_{37}\text{N}_2\text{O}_2$   $[\text{M}+\text{H}]^+$  433.2850, found 433.2843.

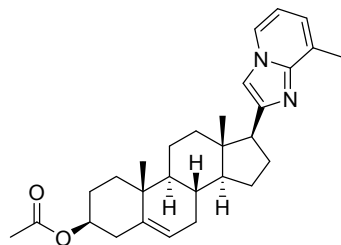

#### *17β-(8'-Methylimidazo[1',2'-a]pyridine)-3β-acetoxy-androst-5-ene (3ba):*

Yield 68 mg (77%, 0.2 mmol); yellow solid; mp 94-95 °C;  $R_f$  = 0.63 (petroleum ether – EtOAc, 1:1);  $^1\text{H NMR}$  (300 MHz,  $\text{CDCl}_3$ ):  $\delta$  7.93 (d,  $J$  = 6.5 Hz, 1H, Ar), 7.35 (s, 1H, Ar), 6.89 (d,  $J$  = 5.9 Hz, 1H, Ar), 6.62 (dd,  $J$  = 5.9, 6.5 Hz, 1H, Ar), 5.44 – 5.39 (m, 1H, 6-CH), 4.74 – 4.52 (m, 1H, 3 $\alpha$ -CH), 2.95 (t,  $J$  = 9.9 Hz, 1H, 17 $\alpha$ -CH), 2.60 (s, 3H, CH<sub>3</sub>), 2.43 – 2.25 (m, 2H), 2.21 – 1.96 (m, 3H), 2.05 (s, 3H, 3-OCOCH<sub>3</sub>), 1.96 – 1.74 (m, 3H), 1.73 – 1.50 (m, 4H), 1.49 – 1.16 (m, 6H), 1.16 – 0.96 (m, 1H), 1.04 (s, 3H, 19-CH<sub>3</sub>), 0.56 (s, 3H, 18-CH<sub>3</sub>);  $^{13}\text{C NMR}$  (75 MHz,  $\text{CDCl}_3$ ):  $\delta$  170.5, 147.6, 144.9, 139.9, 126.9, 123.1, 122.7, 122.6, 111.7, 109.8, 74.0, 56.3, 50.8, 50.3, 43.9, 38.2, 37.8, 37.1, 36.8, 32.5, 32.0, 27.8, 27.0, 24.8, 21.5, 20.9, 19.4, 17.2, 13.2; IR (KBr): 2945, 2908, 2871, 2361, 1730, 1438, 1364, 1248, 1032, 907, 732  $\text{cm}^{-1}$ ; HRMS (ESI):  $m/z$  calcd for  $\text{C}_{29}\text{H}_{39}\text{N}_2\text{O}_2$   $[\text{M}+\text{H}]^+$  447.3006, found 447.3004.

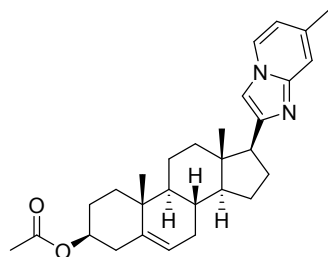

#### *17β-(7'-Methylimidazo[1',2'-a]pyridine)-3β-acetoxy-androst-5-ene (3ca):*

Yield 65 mg (73%, 0.2 mmol); yellow solid; mp 124-126 °C;  $R_f$  = 0.18 (petroleum ether – EtOAc, 1:1);  $^1\text{H NMR}$  (300 MHz,  $\text{CDCl}_3$ ):  $\delta$  7.93 (d,  $J$  = 6.9 Hz, 1H, Ar), 7.35 (s, 1H, Ar), 7.28 (s, 1H, Ar), 6.56 (d,  $J$  = 6.9 Hz, 1H, Ar), 5.44 – 5.39 (m, 1H, 6-CH), 4.74 – 4.41 (m, 1H, 3 $\alpha$ -CH), 2.86 (t,  $J$  = 9.8 Hz, 1H, 17 $\alpha$ -CH), 2.41 – 2.23 (m, 3H), 2.38 (s, 3H, CH<sub>3</sub>), 2.20 –

1.99 (m, 3H), 2.05 (s, 3H, 3-OCOCH<sub>3</sub>), 2.00 – 1.70 (m, 5H), 1.70 – 1.48 (m, 4H), 1.46 – 1.32 (m, 3H), 1.32 – 1.05 (m, 1H), 1.03 (s, 3H, 19-CH<sub>3</sub>), 0.55 (s, 3H, 18-CH<sub>3</sub>); <sup>13</sup>C NMR (75 MHz, CDCl<sub>3</sub>): δ 170.6, 147.9, 145.2, 139.9, 134.8, 124.5, 122.6, 115.6, 114.4, 108.9, 74.1, 56.4, 50.8, 50.4, 44.0, 38.2, 38.1, 37.2, 36.8, 32.5, 32.1, 27.9, 26.6, 24.7, 21.5, 21.4, 20.9, 19.4, 13.2; IR (KBr): 3422, 2964, 2941, 2905, 1732, 1374, 1366, 1249, 1034, 731 cm<sup>-1</sup>; HRMS (ESI): m/z calcd for C<sub>29</sub>H<sub>39</sub>N<sub>2</sub>O<sub>2</sub> [M+H]<sup>+</sup> 447.3006, found 447.2991.

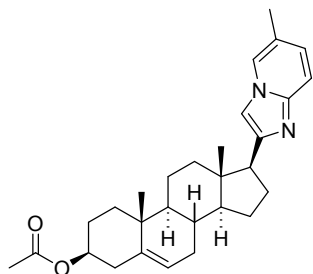

*17β-(6'-Methylimidazo[1',2'-a]pyridine)-3β-acetoxy-androst-5-ene*  
(**3da**):

Yield 33 mg (38%, 0.2 mmol); yellow solid; mp 91-93 °C; R<sub>f</sub> = 0.15 (petroleum ether – EtOAc, 1:1); <sup>1</sup>H NMR (300 MHz, CDCl<sub>3</sub>): δ 7.84 (s, 1H, Ar), 7.47 (d, *J* = 9.1 Hz, 1H, Ar), 7.28 (s, 1H, Ar), 6.95 (d, *J* = 9.1 Hz, 1H, Ar), 5.44 – 5.39 (m, 1H, 6-CH), 4.77 – 4.47 (m, 1H, 3α-CH), 2.85 (t, *J* = 9.8 Hz, 1H, 17α-CH), 2.52 – 2.23 (m, 2H), 2.30 (s, 3H, CH<sub>3</sub>), 2.23 – 1.98 (m, 3H), 2.05 (s, 3H, 3-OCOCH<sub>3</sub>), 2.00 – 1.74 (m, 4H), 1.75 – 1.48 (m, 4H), 1.48 – 1.08 (m, 6H), 1.03 (s, 3H, 19-CH<sub>3</sub>), 0.55 (s, 3H, 18-CH<sub>3</sub>); <sup>13</sup>C NMR (75 MHz, CDCl<sub>3</sub>): δ 170.5, 148.1, 143.9, 139.9, 126.7, 123.0, 122.6, 121.1, 116.5, 109.3, 74.1, 56.4, 50.9, 50.4, 44.0, 38.2, 38.1, 37.1, 36.8, 32.4, 32.0, 27.9, 26.5, 24.7, 21.4, 20.9, 19.4, 18.2, 13.2; IR (KBr): 3423, 2964, 2945, 1732, 1247, 1031, 907, 800, 731, 439 cm<sup>-1</sup>; HRMS (ESI): m/z calcd for C<sub>29</sub>H<sub>39</sub>N<sub>2</sub>O<sub>2</sub> [M+H]<sup>+</sup> 447.3006, found 447.3009.

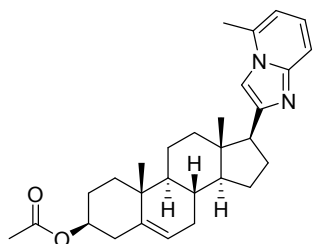

*17β-(5'-Methylimidazo[1',2'-a]pyridine)-3β-acetoxy-androst-5-ene*  
(**3ea**):

Yield 40 mg (9%, 1.0 mmol); yellow solid; mp 81-83 °C; R<sub>f</sub> = 0.22 (petroleum ether – EtOAc, 1:1); <sup>1</sup>H NMR (300 MHz, CDCl<sub>3</sub>): δ 7.51 (d, *J* = 9.0 Hz, 1H, Ar), 7.24 (s, 1H, Ar), 7.16 – 7.03 (dd, *J* = 6.8, 9.0 Hz, 1H, Ar), 6.58 (d, *J* = 6.8 Hz, 1H, Ar), 5.45 – 5.41 (m, 1H, 6-CH), 4.72 – 4.57 (m, 1H, 3α-CH), 2.92 (t, *J* = 9.8 Hz, 1H, 17α-CH), 2.72 – 2.43 (m, 3H), 2.58 (s, 3H, CH<sub>3</sub>), 2.42 – 2.29 (m, 2H), 2.29 – 1.96 (m, 4H), 2.05 (s, 3H, 3-OCOCH<sub>3</sub>), 1.95 – 1.74 (m, 3H), 1.73 – 1.49 (m, 3H), 1.48 – 1.35 (m, 4H), 1.04 (s, 3H, 19-CH<sub>3</sub>), 0.60 (s, 3H, 18-CH<sub>3</sub>); <sup>13</sup>C NMR (126 MHz, CDCl<sub>3</sub>): δ 170.5, 139.7, 122.4, 114.1, 106.7, 73.9, 56.2, 50.2, 44.0, 38.1, 37.8, 37.0, 36.7, 32.3, 31.9, 30.9, 29.6, 27.7, 26.5, 24.6, 21.4, 20.7, 19.3, 18.7, 13.1 (several signals were not observed); IR (KBr): 3423, 2928, 2851, 1732, 1458, 1365, 1249, 1034, 781, 551, 427 cm<sup>-1</sup>; HRMS (ESI): m/z calcd for C<sub>29</sub>H<sub>39</sub>N<sub>2</sub>O<sub>2</sub> [M+H]<sup>+</sup> 447.3006, found 447.3012.

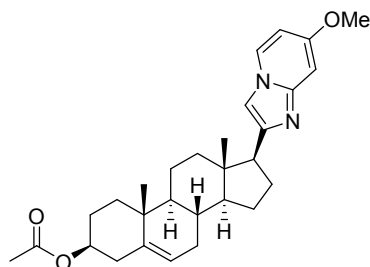

*17β-(7'-Methoxyimidazo[1',2'-a]pyridine)-3β-acetoxy-androst-5-ene (3fa):*

Yield 64 mg (70%, 0.2 mmol); brown solid; mp 171-172 °C;  $R_f = 0.45$  (petroleum ether – EtOAc, 3:1);  $^1\text{H NMR}$  (400 MHz,  $\text{CDCl}_3$ ):  $\delta$  7.83 (d,  $J = 7.2$  Hz, 1H, Ar), 7.16 (s, 1H, Ar), 6.86 (d,  $J = 2.4$  Hz, 1H, Ar), 6.43-6.41 (m, 1H, Ar), 5.39 (d,  $J = 5.2$  Hz, 1H, 6-CH), 4.65-4.56 (m, 1H, 3 $\alpha$ -CH), 3.81 (s, 3H,  $\text{OCH}_3$ ), 2.79 (t,  $J = 9.6$  Hz, 1H, 17 $\alpha$ -CH), 2.35-2.30 (m, 2H), 2.07-2.02 (m, 8H), 1.89-1.84 (m, 2H), 1.80-1.74 (m, 1H), 1.65-1.55 (m, 3H), 1.52-1.50 (m, 1H), 1.43-1.31 (m, 3H), 1.26-1.19 (m, 2H), 1.01 (s, 3H, 19- $\text{CH}_3$ ), 0.54 (s, 3H, 18- $\text{CH}_3$ );  $^{13}\text{C}\{^1\text{H}\}$  NMR (100 MHz,  $\text{CDCl}_3$ ):  $\delta$  170.6, 157.4, 147.9, 146.2, 139.9, 125.6, 122.6, 108.2, 106.6, 94.6, 74.1, 56.3, 55.5, 50.8, 50.3, 43.9, 38.2, 38.1, 37.1, 36.8, 32.4, 32.0, 27.9, 26.4, 24.7, 21.5, 20.9, 19.4, 13.2; Anal. Calcd for  $\text{C}_{29}\text{H}_{38}\text{N}_2\text{O}_3$ : C, 75.29; H, 8.28; N, 6.06%; Found: C, 75.13; H, 8.31; N, 6.11%.

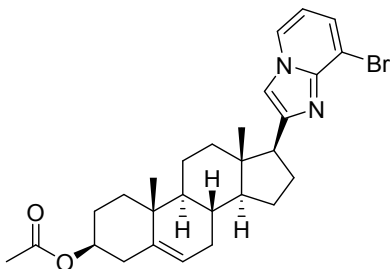

*17β-(8'-Bromo-imidazo[1',2'-a]pyridine)-3β-acetoxy-androst-5-ene (3ga):*

Yield 65 mg (64%, 0.2 mmol); brown gummy mass;  $R_f = 0.45$  (petroleum ether – EtOAc, 3:1);  $^1\text{H NMR}$  (400 MHz,  $\text{CDCl}_3$ ):  $\delta$  8.03-8.01 (m, 1H, Ar), 7.43 (s, 1H, Ar), 7.35-7.33 (m, 1H, Ar), 6.58 (t,  $J = 7.2$  Hz, 1H, Ar), 5.39 (d,  $J = 4.8$  Hz, 1H, 6-CH), 4.64-4.58 (m, 1H, 3 $\alpha$ -CH), 2.95 (t,  $J = 10.0$  Hz, 1H, 17 $\alpha$ -CH), 2.35-2.30 (m, 2H), 2.10-2.03 (m, 5H), 1.90-1.86 (m, 3H), 1.74 (s, 2H), 1.63-1.53 (m, 4H), 1.46-1.38 (m, 2H), 1.28-1.24 (m, 4H), 1.01 (s, 3H, 19- $\text{CH}_3$ ), 0.53 (s, 3H, 18- $\text{CH}_3$ );  $^{13}\text{C}\{^1\text{H}\}$  NMR (100 MHz,  $\text{CDCl}_3$ ):  $\delta$  170.6, 149.5, 142.7, 139.9, 126.1, 124.6, 122.6, 115.2, 111.7, 111.2, 74.1, 56.3, 50.8, 50.3, 44.1, 38.2, 37.8, 37.1, 36.8, 32.5, 32.0, 27.9, 26.9, 24.8, 21.5, 20.9, 19.5, 13.3; Anal. Calcd for  $\text{C}_{28}\text{H}_{35}\text{BrN}_2\text{O}_2$ : C, 65.75; H, 6.90; N, 5.48%; Found: C, 65.93; H, 6.86; N, 5.40%.

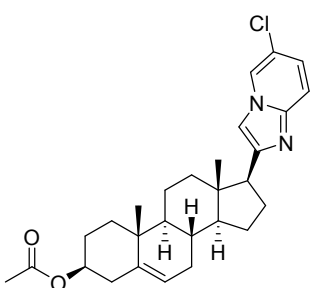

*17β-(6'-Chloro-imidazo[1',2'-a]pyridine)-3β-acetoxy-androst-5-ene (3ha):*

Yield 81 mg (87%, 0.2 mmol); yellow solid; mp 130-132 °C;  $R_f = 0.15$  (petroleum ether – EtOAc, 3:1);  $^1\text{H NMR}$  (300 MHz,  $\text{CDCl}_3$ ):  $\delta$  8.11 (d,  $J = 1.9$  Hz, 1H, Ar), 7.51 (d,  $J = 9.5$  Hz, 1H, Ar), 7.35 (s, 1H, Ar), 7.07 (dd,  $J = 1.9, 9.5$  Hz, 1H, Ar), 5.46 – 5.36 (m, 1H, 6-CH), 4.71 – 4.56 (m, 1H, 3 $\alpha$ -CH), 2.86 (t,  $J = 9.8$  Hz, 1H, 17 $\alpha$ -CH), 2.43 – 2.24 (m, 2H), 2.24 – 1.97 (m, 4H), 2.04 (s, 3H, 3- $\text{OCOCH}_3$ ), 1.96 – 1.74 (m, 4H), 1.73 – 1.49 (m, 3H), 1.48 – 1.33 (m, 3H), 1.31 – 1.14 (m, 3H), 1.02 (s, 3H, 19- $\text{CH}_3$ ), 0.54 (s, 3H, 18- $\text{CH}_3$ );  $^{13}\text{C}$  NMR (75 MHz,  $\text{CDCl}_3$ ):  $\delta$  170.6, 149.7, 143.2, 139.9, 125.1, 123.0, 122.5, 119.9, 117.5, 110.1, 74.1, 56.3, 50.8, 50.4, 44.2, 38.2, 38.1, 37.2, 36.8, 32.4, 32.0, 27.9, 26.5, 24.7, 21.5, 20.9, 19.4,

13.2; IR (KBr): 2964, 2941, 2905, 1732, 1703, 1520, 1500, 1374, 1249, 1068, 1037, 801, 793, 731, 706  $\text{cm}^{-1}$ ; HRMS (ESI):  $m/z$  calcd for  $\text{C}_{28}\text{H}_{36}\text{ClN}_2\text{O}_2$   $[\text{M}+\text{H}]^+$  467.2460, found 467.2452.

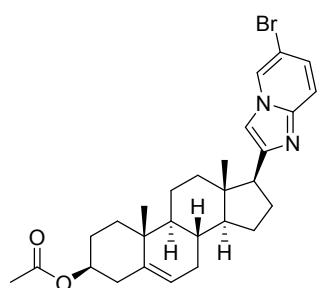

*17β-(6'-Bromo-imidazo[1',2'-a]pyridine)-3β-acetoxy-androst-5-ene (3ia):*

Yield 73 mg (72%, 0.2 mmol); yellow solid;  $R_f$  = 0.25 (petroleum ether – EtOAc, 3:1);  $^1\text{H}$  NMR (300 MHz,  $\text{CDCl}_3$ ):  $\delta$  8.22 (d,  $J$  = 1.5 Hz, 1H, Ar), 7.50 (d,  $J$  = 9.5 Hz, 1H, Ar), 7.35 (s, 1H), 7.20 (dd,  $J$  = 1.5, 9.5 Hz, 1H, Ar), 5.46 – 5.36 (m, 1H, 6-CH), 4.72 – 4.55 (m, 1H, 3 $\alpha$ -CH), 2.87 (t,  $J$  = 9.8 Hz, 1H, 17 $\alpha$ -CH), 2.47 – 2.15 (m, 4H), 2.14 – 1.97 (m, 2H), 2.05 (s, 3H, 3-OCOCH<sub>3</sub>), 1.97 – 1.73 (m, 5H), 1.72 – 1.49 (m, 5H), 1.11 – 0.85 (m, 3H), 1.04 (s, 3H, 19-CH<sub>3</sub>), 0.55 (s, 3H, 18-CH<sub>3</sub>);  $^{13}\text{C}$  NMR (126 MHz,  $\text{CDCl}_3$ )  $\delta$  170.5, 139.7, 127.1, 125.1, 117.6, 109.8, 56.2, 54.8, 50.6, 50.1, 49.9, 44.0, 38.1, 38.0, 37.9, 37.0, 36.7, 32.3, 31.9, 29.7, 27.7, 26.3, 24.6, 24.5, 21.4, 20.7, 19.3, 13.1; IR (KBr): 2942, 2904, 1729, 1701, 1509, 1499, 1373, 1247, 1031, 907, 798, 732  $\text{cm}^{-1}$ ; HRMS (ESI):  $m/z$  calcd for  $\text{C}_{28}\text{H}_{36}\text{BrN}_2\text{O}_2$   $[\text{M}+\text{H}]^+$  511.1955, found 511.1950.

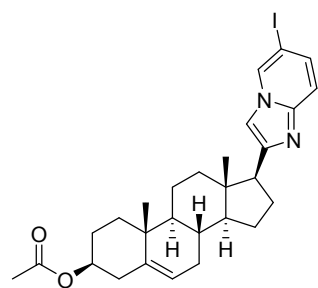

*17β-(6'-Iodo-imidazo[1',2'-a]pyridine)-3β-acetoxy-androst-5-ene (3ja):*

Yield 82 mg (74%, 0.2 mmol); yellow solid; mp 168-170 °C;  $R_f$  = 0.20 (petroleum ether – EtOAc, 3:1);  $^1\text{H}$  NMR (300 MHz,  $\text{CDCl}_3$ ):  $\delta$  8.33 (s, 1H, Ar), 7.40 (d,  $J$  = 9.4 Hz, 1H, Ar), 7.30 (d,  $J$  = 9.4 Hz, 1H, Ar), 7.28 (s, 1H, Ar), 5.46 – 5.36 (m, 1H, 6-CH), 4.71 – 4.55 (m, 1H, 3 $\alpha$ -CH), 2.86 (t,  $J$  = 9.8 Hz, 1H, 17 $\alpha$ -CH), 2.43 – 2.26 (m, 2H), 2.23 – 1.99 (m, 3H), 2.05 (s, 3H, 3-OCOCH<sub>3</sub>), 1.98 – 1.72 (m, 4H), 1.70 – 1.47 (m, 4H), 1.30 – 1.15 (m, 3H), 1.12 – 0.96 (m, 3H), 1.03 (s, 3H, 19-CH<sub>3</sub>), 0.54 (s, 3H, 18-CH<sub>3</sub>);  $^{13}\text{C}$  NMR (75 MHz,  $\text{CDCl}_3$ )  $\delta$  170.5, 150.3, 140.6, 139.7, 123.7, 123.0, 122.4, 121.8, 118.7, 111.5, 73.9, 56.2, 50.6, 50.1, 44.0, 38.1, 37.7, 37.0, 36.7, 32.3, 31.9, 27.7, 26.6, 24.6, 21.4, 20.7, 19.3, 13.1; IR (KBr): 2942, 2903, 1727, 1493, 1373, 1365, 1332, 1248, 1030, 917, 797, 754, 733, 671  $\text{cm}^{-1}$ ; HRMS (ESI):  $m/z$  calcd for  $\text{C}_{28}\text{H}_{36}\text{IN}_2\text{O}_2$   $[\text{M}+\text{H}]^+$  559.1816, found 559.1818.

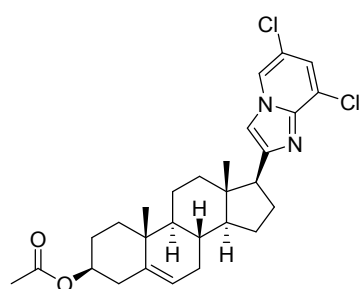

*17β-(6',8'-Dichloro-imidazo[1',2'-a]pyridine)-3β-acetoxy-androst-5-ene (3ka):*

Yield 35 mg (7%, 1.0 mmol); yellow solid;  $R_f$  = 0.66 (petroleum ether – EtOAc, 3:1);  $^1\text{H}$  NMR (300 MHz,  $\text{CDCl}_3$ ):  $\delta$  8.06 (s, 1H, Ar), 7.42 (s, 1H, Ar), 7.21 (s, 1H, Ar), 5.47 – 5.38 (m, 1H, 6-CH), 4.75 – 4.59 (m, 1H, 3 $\alpha$ -CH), 2.94 (t,  $J$  = 9.9 Hz, 1H, 17 $\alpha$ -CH), 2.42 – 2.21 (m, 2H), 2.20 – 2.00 (m, 2H), 2.06 (s, 3H, 3-OCOCH<sub>3</sub>), 1.99 – 1.74 (m, 3H), 1.73 – 1.49 (m, 7H), 1.48 – 1.33 (m, 3H), 1.32 – 1.16 (m, 2H), 1.04 (s, 3H, 19-CH<sub>3</sub>), 0.55 (s, 3H, 18-CH<sub>3</sub>);  $^{13}\text{C}$  NMR (126 MHz,  $\text{CDCl}_3$ )  $\delta$  170.5, 150.4, 140.6, 139.7, 123.7,

123.0, 122.4, 121.8, 118.7, 111.5, 73.9, 56.2, 50.6, 50.1, 44.0, 38.1, 37.7, 37.0, 36.7, 32.3, 31.9, 27.7, 26.6, 24.6, 21.4, 20.7, 19.3, 13.1; IR (KBr): 3343, 2945, 2904, 1727, 1516, 1374, 1249, 1030, 933, 819, 754  $\text{cm}^{-1}$ ; HRMS (ESI):  $m/z$  calcd for  $\text{C}_{28}\text{H}_{35}\text{Cl}_2\text{N}_2\text{O}_2$   $[\text{M}+\text{H}]^+$  501.2070, found 501.2059.

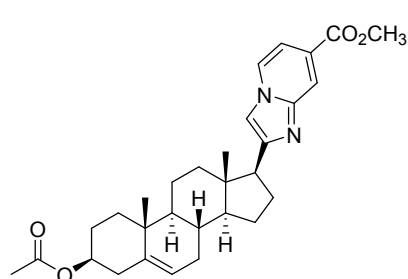

*17β-(Methyl imidazo[1',2'-a]pyridine-6'-carboxylate)-3β-acetoxy-androst-5-ene (31a):*

Yield 142 mg (29%, 1.0 mmol); yellow solid; mp 229-231°C;  $R_f$  = 0.16 (petroleum ether – EtOAc, 3:1);  $^1\text{H}$  NMR (300 MHz,  $\text{CDCl}_3$ ):  $\delta$  8.32 (s, 1H, Ar), 8.09 (d,  $J$  = 7.1 Hz, 1H, Ar), 7.48 (s, 1H, Ar), 7.34 (d,  $J$  = 7.1 Hz, 1H, Ar), 5.47 – 5.39 (m, 1H, 6-CH), 4.75 – 4.44 (m, 1H, 3 $\alpha$ -CH), 3.95 (s, 3H,  $\text{OCH}_3$ ), 2.90 (t,  $J$  = 9.8 Hz, 1H, 17 $\alpha$ -CH), 2.41 – 2.30 (m, 2H), 2.27 – 1.93 (m, 4H), 2.04 (s, 3H, 3- $\text{OCOCH}_3$ ), 1.91 – 1.77 (m, 3H), 1.73 – 1.50 (m, 4H), 1.49 – 1.34 (m, 3H), 1.33 – 1.13 (m, 3H), 1.02 (s, 3H, 19- $\text{CH}_3$ ), 0.55 (s, 3H, 18- $\text{CH}_3$ );  $^{13}\text{C}$  NMR (75 MHz,  $\text{CDCl}_3$ ):  $\delta$  170.6, 166.0, 151.3, 143.7, 139.9, 125.0, 124.6, 122.5, 119.8, 111.3, 111.1, 74.0, 56.3, 52.5, 50.9, 50.3, 44.2, 38.2, 38.0, 37.1, 36.8, 32.4, 32.0, 27.8, 26.4, 24.7, 21.5, 20.8, 19.4, 13.2; IR (KBr): 2964, 2941, 2900, 1722, 1436, 1332, 1240, 1088, 1040, 761, 743  $\text{cm}^{-1}$ ; HRMS (ESI):  $m/z$  calcd for  $\text{C}_{30}\text{H}_{39}\text{N}_2\text{O}_4$   $[\text{M}+\text{H}]^+$  491.2904, found 491.2895.

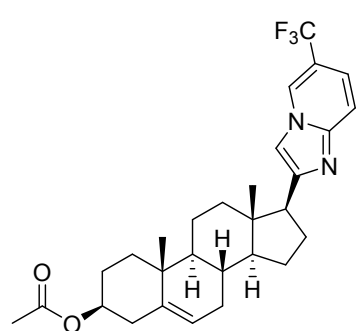

*17β-(6'-Trifluoromethyl-imidazo[1',2'-a]pyridine)-3β-acetoxy-androst-5-ene (3ma):*

Yield 82 mg (82%, 0.2 mmol); brown gummy mass;  $R_f$  = 0.55 (petroleum ether – EtOAc, 2:1);  $^1\text{H}$  NMR (400 MHz,  $\text{CDCl}_3$ ):  $\delta$  8.42 (s, 1H, Ar), 7.63 (d,  $J$  = 9.6 Hz, 1H, Ar), 7.44 (s, 1H, Ar), 7.24-7.21 (m, 1H, Ar), 5.38 (d,  $J$  = 4.8 Hz, 1H, 6-CH), 4.64-4.56 (m, 1H, 3 $\alpha$ -CH), 2.86 (t,  $J$  = 10.0 Hz, 1H, 17 $\alpha$ -CH), 2.32-2.29 (m, 2H), 2.16-2.01 (m, 6H), 1.95-1.92 (m, 1H), 1.88-1.80 (m, 3H), 1.65-1.49 (m, 4H), 1.40-1.36 (m, 3H), 1.28-1.11 (m, 3H), 1.00 (s, 3H, 19- $\text{CH}_3$ ), 0.51 (s, 3H, 18- $\text{CH}_3$ );  $^{13}\text{C}\{^1\text{H}\}$  NMR (100 MHz,  $\text{CDCl}_3$ ):  $\delta$  170.6, 150.7, 144.5, 139.8, 124.2 (q,  $J_{\text{C-F}}$  = 6.0 Hz), 122.5, 119.6, 117.7, 116.1 (q,  $J_{\text{C-F}}$  = 34.0 Hz), 112.6 (q,  $J_{\text{C-F}}$  = 288.0 Hz), 110.9, 74.0, 56.3, 50.8, 50.2, 44.2, 38.2, 38.0, 37.1, 36.8, 32.4, 32.0, 27.8, 26.4, 24.7, 21.5, 20.8, 19.4, 13.2; Anal. Calcd for  $\text{C}_{29}\text{H}_{35}\text{F}_3\text{N}_2\text{O}_2$ : C, 69.58; H, 7.05; N, 5.60%; Found: C, 69.41; H, 7.09; N, 5.51%.

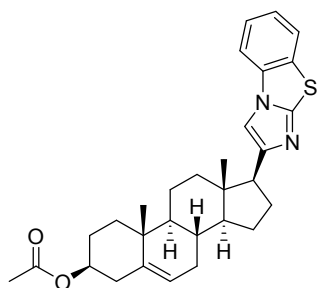

*17β-(Benzo[d]imidazo[2',1'-b]thiazole)-3β-acetoxy-androst-5-ene (3na):*

Yield 87 mg (18%, 1.0 mmol); yellow solid;  $R_f = 0.50$  (petroleum ether – EtOAc, 3:1);  $^1\text{H NMR}$  (300 MHz,  $\text{CDCl}_3$ ):  $\delta$  7.68 (d,  $J = 7.8$  Hz, 1H, Ar), 7.55 (d,  $J = 7.8$  Hz, 1H, Ar), 7.46 (s, 1H, Ar), 7.41 (dd,  $J = 7.8$  Hz, 1H, Ar), 7.30 (dd,  $J = 7.8$  Hz, 1H, Ar), 5.49 – 5.38 (m, 1H, 6-CH), 4.75 – 4.45 (m, 1H, 3 $\alpha$ -CH), 2.81 (t,  $J = 9.9$  Hz, 1H, 17 $\alpha$ -CH), 2.46 – 2.19 (m, 2H), 2.18 – 1.96 (m, 3H), 2.05 (s, 3H, 3-OCOCH<sub>3</sub>), 1.95 – 1.74 (m, 3H), 1.73 – 1.49 (m, 6H), 1.48 – 1.35 (m, 2H), 1.14 – 0.95 (m, 1H), 1.04 (s, 3H, 19-CH<sub>3</sub>), 0.94 – 0.72 (m, 2H), 0.59 (s, 3H, 18-CH<sub>3</sub>);  $^{13}\text{C NMR}$  (126 MHz,  $\text{CDCl}_3$ ):  $\delta$  170.3, 149.8, 139.7, 132.3, 130.1, 126.3, 125.9, 124.2, 122.4, 112.3, 108.2, 73.9, 56.0, 51.0, 50.2, 43.7, 38.1, 38.0, 37.0, 36.7, 32.3, 31.9, 29.6, 27.7, 26.2, 24.5, 21.4, 20.8, 19.3, 13.0; IR (KBr): 2939, 2851, 1729, 1542, 1490, 1465, 1439, 1246, 1028, 748, 425  $\text{cm}^{-1}$ ; HRMS (ESI):  $m/z$  calcd for  $\text{C}_{30}\text{H}_{37}\text{N}_2\text{O}_2\text{S}$   $[\text{M}+\text{H}]^+$  489.2570, found 489.2559.

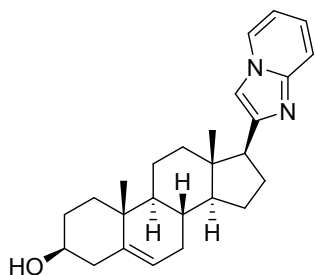

*17β-(Imidazo[1',2'-a]pyridine)-3β-hydroxy-androst-5-ene (3ab):*

Yield 55 mg (71%, 0.2 mmol); light yellow gummy mass;  $R_f = 0.45$  (petroleum ether – EtOAc, 2:1);  $^1\text{H NMR}$  (400 MHz,  $\text{CDCl}_3$ ):  $\delta$  8.05–8.03 (m, 1H, Ar), 7.55 (d,  $J = 9.2$  Hz, 1H, Ar), 7.35 (s, 1H, Ar), 7.11–7.06 (m, 1H, Ar), 6.72–6.68 (m, 1H, Ar), 5.37–5.36 (m, 1H, 6-CH), 3.54–3.52 (m, 1H, 3 $\alpha$ -CH), 2.86 (t,  $J = 10.0$  Hz, 1H, 17 $\alpha$ -CH), 2.33–2.25 (m, 2H), 2.16–2.06 (m, 2H), 1.97–1.93 (m, 1H), 1.88–1.74 (m, 5H), 1.60–1.38 (m, 7H), 1.28–1.22 (m, 2H), 1.00 (s, 3H, 19-CH<sub>3</sub>), 0.54 (s, 3H, 18-CH<sub>3</sub>);  $^{13}\text{C}\{^1\text{H}\}$  NMR (100 MHz,  $\text{CDCl}_3$ ):  $\delta$  148.4, 144.8, 141.0, 125.2, 123.7, 121.7, 117.2, 111.7, 109.6, 71.9, 56.4, 50.9, 50.4, 44.1, 42.4, 38.1, 37.4, 36.8, 32.5, 32.1, 31.8, 26.6, 24.8, 20.9, 19.5, 13.2; Anal. Calcd for  $\text{C}_{26}\text{H}_{34}\text{N}_2\text{O}$ : C, 79.96; H, 8.77; N, 7.17%; Found: C, 79.76; H, 8.81; N, 7.11%.

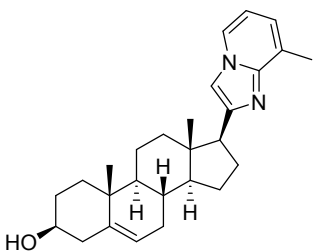

*17β-(8'-Methylimidazo[1',2'-a]pyridine)-3β-hydroxy-androst-5-ene (3bb):*

Yield 54 mg (68%, 0.2 mmol); brown gummy mass;  $R_f = 0.45$  (petroleum ether – EtOAc, 2:1);  $^1\text{H NMR}$  (400 MHz,  $\text{CDCl}_3$ ):  $\delta$  7.91 (d,  $J = 6.8$  Hz, 1H, Ar), 7.33 (s, 1H, Ar), 6.87 (d,  $J = 6.8$  Hz, 1H, Ar), 6.61 (t,  $J = 6.8$  Hz, 1H, Ar), 5.37 (d,  $J = 5.2$  Hz, 1H, 6-CH), 3.57–3.49 (m, 1H, 3 $\alpha$ -CH), 2.93 (t,  $J = 10.0$  Hz, 1H, 17 $\alpha$ -CH), 2.58 (s, 3H, CH<sub>3</sub>), 2.33–2.23 (m, 2H), 2.14–1.98 (m, 4H), 1.88–1.77 (m, 5H), 1.65–1.47 (m, 5H), 1.45–1.35 (m, 3H), 1.00 (s, 3H, 19-CH<sub>3</sub>), 0.54 (s, 3H, 18-CH<sub>3</sub>);  $^{13}\text{C}\{^1\text{H}\}$  NMR (100 MHz,  $\text{CDCl}_3$ ):  $\delta$  147.8, 145.1, 141.0, 127.0, 123.1, 122.6, 121.7, 111.7, 109.8, 71.9, 56.4, 50.9, 50.4, 43.9, 42.4, 37.9, 37.4, 36.7, 32.5, 32.1, 31.8,



27.1, 24.8, 21.0, 19.5, 17.3, 13.2; Anal. Calcd for C<sub>27</sub>H<sub>36</sub>N<sub>2</sub>O: C, 80.15; H, 8.97; N, 6.92%; Found: C, 80.27; H, 8.95; N, 6.99%.

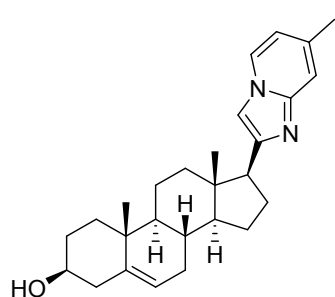

*17β-(7'-Methylimidazo[1',2'-a]pyridine)-3β-hydroxy-androst-5-ene (3cb):*

Yield 55 mg (69%, 0.2 mmol); brown gummy mass;  $R_f = 0.50$  (petroleum ether – EtOAc, 2:1); <sup>1</sup>H NMR (400 MHz, CDCl<sub>3</sub>): δ 7.91 (d,  $J = 6.8$  Hz, 1H, Ar), 7.38 (s, 1H, Ar), 7.26 (s, 1H, Ar), 6.55 (d,  $J = 6.8$  Hz, 1H, Ar), 5.35 (s, 1H, 6-CH), 3.56-3.49 (m, 1H, 3α-CH), 2.84 (t,  $J = 10.4$  Hz, 1H, 17α-CH), 2.35 (s, 3H, CH<sub>3</sub>), 2.29-2.22 (m, 2H), 2.08-1.98 (m, 5H), 1.86-1.79 (m, 3H), 1.62-1.47 (m, 5H), 1.41-1.37 (m, 2H), 1.26-1.21 (m, 2H), 0.98 (s, 3H, 19-CH<sub>3</sub>), 0.52 (s, 3H, 18-CH<sub>3</sub>); <sup>13</sup>C{<sup>1</sup>H} NMR (100 MHz, CDCl<sub>3</sub>): δ 147.9, 145.2, 141.0, 135.0, 124.5, 121.6, 115.6, 114.5, 109.0, 71.8, 56.4, 50.9, 50.4, 44.0, 42.4, 38.2, 37.4, 36.7, 32.4, 32.0, 31.7, 26.7, 24.7, 21.4, 20.9, 19.5, 13.2; Anal. Calcd for C<sub>27</sub>H<sub>36</sub>N<sub>2</sub>O: C, 80.15; H, 8.97; N, 6.92%; Found: C, 79.97; H, 9.00; N, 6.87%.

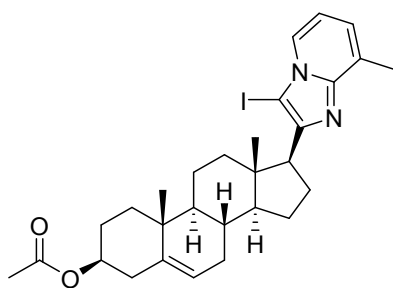

*17β-(3'-Iodo-8'-methylimidazo[1',2'-a]pyridine)-3β-acetoxy-androst-5-ene (4ba):*

Yield 101 mg (89%, 0.2 mmol); brown gummy mass;  $R_f = 0.50$  (petroleum ether – EtOAc, 2:1); <sup>1</sup>H NMR (400 MHz, CDCl<sub>3</sub>): δ 7.97 (d,  $J = 6.8$  Hz, 1H, Ar), 6.93 (d,  $J = 6.8$  Hz, 1H, Ar), 6.73 (t,  $J = 6.8$  Hz, 1H, Ar), 5.40 (d,  $J = 4.0$  Hz, 1H, 6-CH), 4.63-4.58 (m, 1H, 3α-CH), 2.93 (t,  $J = 9.6$  Hz, 1H, 17α-CH), 2.58 (s, 3H, CH<sub>3</sub>), 2.34-2.32 (m, 2H), 2.08-1.93 (m, 5H), 1.87-1.84 (m, 3H), 1.65-1.28 (m, 10H), 1.18-1.14 (m, 1H), 1.03-1.01 (m, 4H), 0.72 (s, 3H, 18-CH<sub>3</sub>); <sup>13</sup>C{<sup>1</sup>H} NMR (100 MHz, CDCl<sub>3</sub>): δ 170.6, 150.4, 147.8, 139.8, 127.3, 124.0, 123.1, 122.7, 112.3, 74.1, 56.7, 50.4, 49.8, 46.2, 38.9, 38.2, 37.1, 36.8, 32.3, 32.1, 27.9, 26.9, 25.0, 21.5, 21.0, 19.5, 16.7, 13.5; Anal. Calcd for C<sub>29</sub>H<sub>37</sub>IN<sub>2</sub>O<sub>2</sub>: C, 60.84; H, 6.51; N, 4.89%; Found: C, 60.63; H, 6.55; N, 4.95%.

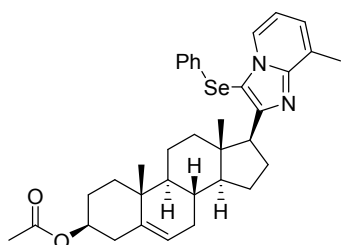

*17β-(8'-Methyl-3'-phenylselanyl-imidazo[1',2'-a]pyridine)-3β-acetoxy-androst-5-ene (5ba):*

Yield 86 mg (72%, 0.2 mmol); brown gummy mass;  $R_f = 0.50$  (petroleum ether – EtOAc, 2:1); <sup>1</sup>H NMR (400 MHz, CDCl<sub>3</sub>): δ 8.05 (d,  $J = 6.8$  Hz, 1H, Ar), 7.15-7.11 (m, 3H, Ar), 6.99-6.97 (m, 3H, Ar), 6.65 (t,  $J = 6.8$  Hz, 1H, Ar), 5.40 (d,  $J = 4.8$  Hz, 1H, 6-CH), 4.64-4.57 (m, 1H, 3α-CH), 3.21 (t,  $J = 9.6$  Hz, 1H, 17α-CH), 2.69-2.59 (m, 4H), 2.33-2.32 (m, 2H), 2.07-1.98 (m, 5H), 1.86-1.80 (m, 3H), 1.62-1.22 (m, 11H), 1.00 (s, 3H, 19-CH<sub>3</sub>), 0.76 (s, 3H, 18-CH<sub>3</sub>); <sup>13</sup>C{<sup>1</sup>H} NMR (100 MHz, CDCl<sub>3</sub>): δ 170.6, 154.3, 147.7, 139.8, 131.7, 129.4, 128.0, 127.2, 126.3, 124.1, 123.1, 122.7, 112.1, 105.5, 74.0, 56.7, 50.3, 49.5, 45.4, 38.2, 38.0,

37.1, 36.8, 32.3, 32.1, 27.8, 27.1, 25.0, 21.5, 20.9, 19.4, 17.0, 13.5;  $^{77}\text{Se}$  NMR (76 MHz,  $\text{CDCl}_3$ )  $\delta$  194.5; Anal. Calcd for  $\text{C}_{35}\text{H}_{42}\text{N}_2\text{O}_2\text{Se}$ : C, 69.87; H, 7.04; N, 4.66%; Found: C, 70.01; H, 7.00; N, 4.77%.

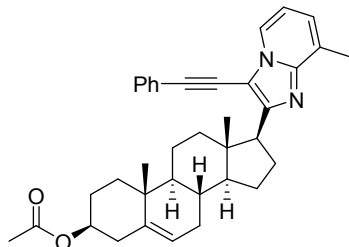

*17β-(8'-Methyl-3'-phenylethynyl-imidazo[1',2'-a]pyridine)-3β-acetoxy-androst-5-ene (6ba):*

Yield 91 mg (84%, 0.2 mmol); brown gummy mass;  $R_f = 0.50$  (petroleum ether – EtOAc, 2:1);  $^1\text{H}$  NMR (400 MHz,  $\text{CDCl}_3$ ):  $\delta$  8.16 (d,  $J = 6.4$  Hz, 1H, Ar), 7.54-7.52 (m, 2H, Ar), 7.40-7.34 (m, 3H, Ar), 6.98 (d,  $J = 6.8$  Hz, 1H, Ar), 6.77 (t,  $J = 7.2$  Hz, 1H, Ar), 5.40 (d,  $J = 4.8$  Hz, 1H, 6-CH), 4.63-4.58 (m, 1H, 3 $\alpha$ -CH), 3.15 (t,  $J = 10.0$  Hz, 1H, 17 $\alpha$ -CH), 2.80-2.71 (m, 1H), 2.61 (s, 3H,  $\text{CH}_3$ ), 2.34-2.31 (m, 2H), 2.11-2.03 (m, 6H), 1.88-1.85 (m, 4H), 1.69-1.53 (m, 4H), 1.47-1.30 (m, 4H), 1.20-1.16 (m, 1H) 1.01 (s, 3H, 19- $\text{CH}_3$ ), 0.70 (s, 3H, 18- $\text{CH}_3$ );  $^{13}\text{C}\{^1\text{H}\}$  NMR (100 MHz,  $\text{CDCl}_3$ ):  $\delta$  170.6, 152.2, 145.0, 139.8, 130.9, 128.6, 128.2, 127.2, 124.1, 123.4, 122.7, 112.3, 107.0, 100.4, 78.8, 74.1, 56.5, 50.8, 50.3, 46.2, 38.3, 38.2, 37.1, 36.8, 32.4, 32.1, 27.8, 25.7, 25.1, 21.5, 20.9, 19.4, 17.1, 13.5 Anal. Calcd for  $\text{C}_{37}\text{H}_{42}\text{N}_2\text{O}_2$ : C, 81.28; H, 7.74; N, 5.12%; Found: C, 81.11; H, 7.76; N, 5.03%.

#### 4. Biology:<sup>1,2</sup>

***In vitro* ligand screening.** Initial screening of the ligands was performed by using HTS (high throughput screening) approach. The 96-well plate was filled by ligand solutions in 50 mM potassium-phosphate buffer (pH 7.4), containing 0.2% CHAPS and 0.3 M NaCl (final ligand concentration was 80  $\mu\text{M}$ ). After adding protein solution (final concentration 1  $\mu\text{M}$ ) difference spectrum (350-500 nm) was measured (protein+ligand vs. protein+DMSO) using SpectraMax i3 spectrophotofluorometer («Molecular Devices», USA). Compounds for which typical spectral response (type I or II) was detected were picked for further experiments.

***Estimation of  $K_d$ .*** Affinity of the ligands was analyzed using spectrophotometric titration in 50 mM potassium-phosphate buffer (pH 7.4), containing 0.2% CHAPS and 0.3 M NaCl with final CYP concentration 1  $\mu\text{M}$ . Ligand solution (stock solutions with concentrations from  $10^{-4}$  to  $10^{-2}$  M) was added to the experimental cuvette and equal volume of the solvent (DMSO) to the control cuvette. For the determination of dissociation constant of enzyme-ligand complex ( $K_d$ ) equation for the Tight binding was used. Titration data were approximated with the following equation by Levenberg-Marquart algorithm:

$$A = A_{\max} \cdot \frac{[L]_t + [R]_0 + K_d - \sqrt{([L]_t + [R]_0 + K_d)^2 - 4[R]_0[L]_t}}{2[R]_0}$$

where

A – amplitude of the spectral change at [L] ligand concentration;

$A_{\max}$  – amplitude of the spectral change at [L] ligand concentration at saturation ligand concentration;

$[L]_t$  – total ligand concentration;

$[R]_0$  – total protein concentration.

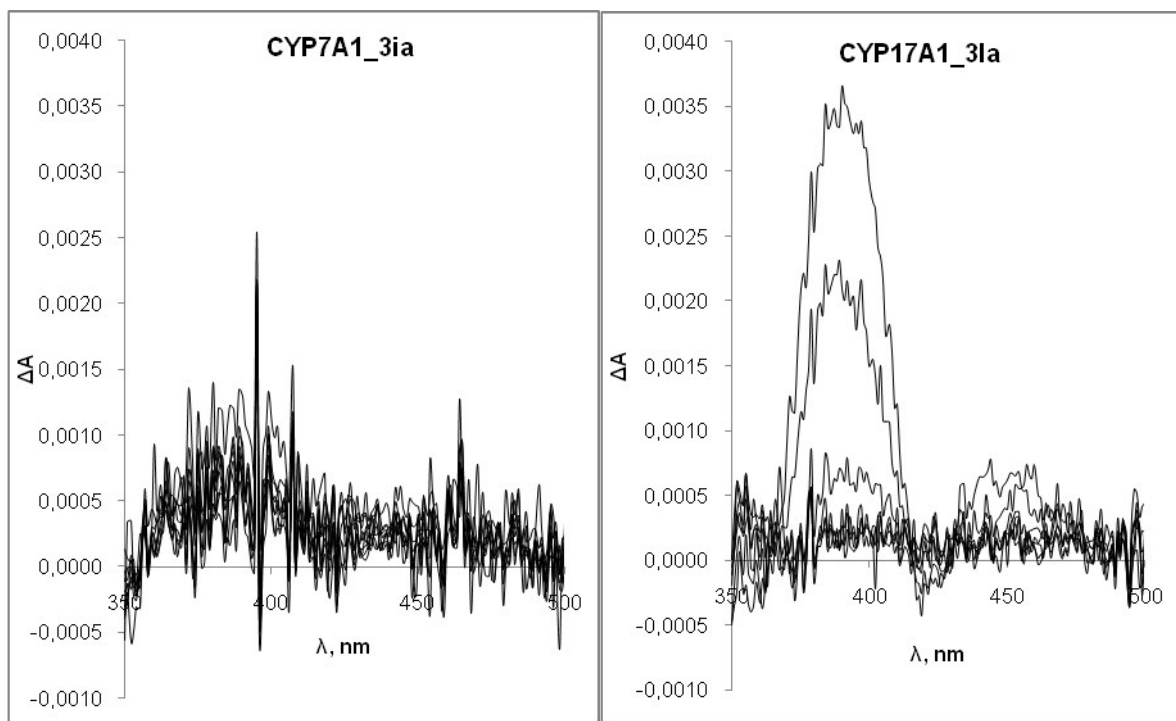

**Figure S1.** Difference spectra, obtained during spectrophotometric titration of human recombinant CYP7A1 and CYP17A1 by compounds **3ia** and **3la**, respectively.<sup>3</sup>

**Cell lines and evaluation of antiproliferative activity.** The human prostate cancer cell line 22Rv1, human breast cancer cell line MCF-7, and human ovarian cancer cell line SKOV3 were purchased from the ATCC collection. 22Rv1 cells were cultured in standard RPMI-1640 medium (Gibco) supplemented with 10% fetal calf serum (FCS) (HyClone), RPMI-1640 Vitamins (PanEco) and 0.1 mg/ml sodium pyruvate (Santa Cruz) at 37 °C, 5% CO<sub>2</sub> and 80–85% humidity (NuAir CO<sub>2</sub> incubator). SKOV3 and MCF-7 cells were cultured in standard (4.5 g/L glucose) DMEM medium (Gibco) supplemented with 10% fetal calf serum (FCS) (HyClone), and 0.1 mg/ml sodium pyruvate. The cell growth was evaluated by the modified MTT (3-[4,5-dimethylthiazol-2-yl]-2,5-diphenyltetrazolium bromide) (Applichem) test<sup>1</sup> as described in<sup>2</sup>.

<sup>3</sup> Other compounds were not active enough against Cytochrome P450 enzymes for determination of  $K_d$

22Rv1 cells were seeded at a density of  $10^5$  cells per well in 24-well plates (Corning) in 900  $\mu$ L of the medium, MCF-7 and SKOV3 cells - at a density of  $4 \times 10^4$  and  $5 \times 10^4$  cells per well, respectively.

The synthesized compounds were dissolved in DMSO (Applichem) to 10 mM before experiments and then were diluted in the medium to the required concentrations. The tested compounds with different concentrations in 100  $\mu$ L of the medium were added 24 h after the seeding, and the cells were grown for 72 h. After incubation with the compounds, the medium was removed, and the MTT reagent dissolved in the medium was added to the final concentration of 0.2 mg/ml to each well and incubated for 3 h. The cell supernatants were removed and the MTT formazan purple crystals were dissolved in 100% DMSO (350  $\mu$ L per well). Then the plates were gently shaken and the absorbance was measured at 540 nm with a MultiScan reader (ThermoFisher). The viability of the cells was assessed after subtraction of the blank value (the absorbance in the well w/o cells) from all wells. Dose-response curves were analyzed by regression analysis using sigmoidal curves (Log(concentration) vs normalized absorbance). The half maximal inhibitory concentrations ( $IC_{50}$ ) were determined with GraphPad Prism.

**Statistical tests.** Statistical analysis was performed using Microsoft Excel and GraphPad Prism. Each biology experiment was repeated three times and results were expressed as mean + S.D. (standard deviation value). Student's t-test was used to evaluate the significance of differences in comparisons. P value of  $<0.05$  was considered statistically significant.

## 5. References:

1. M. Iselt, W. Holtei and P. Hilgard, *Arzneimittelforschung* 1989, **39**, 747.
2. Y. A. Volkova, Y. S. Antonov, A. V. Komkov, A. M. Scherbakov, A. S. Shashkov, L. G. Menchikov, E. I. Chernoburova and I. V. Zavarzin, *RSC Adv.*, 2016, **6**, 42863.

## 6. NMR spectra for the synthesized products

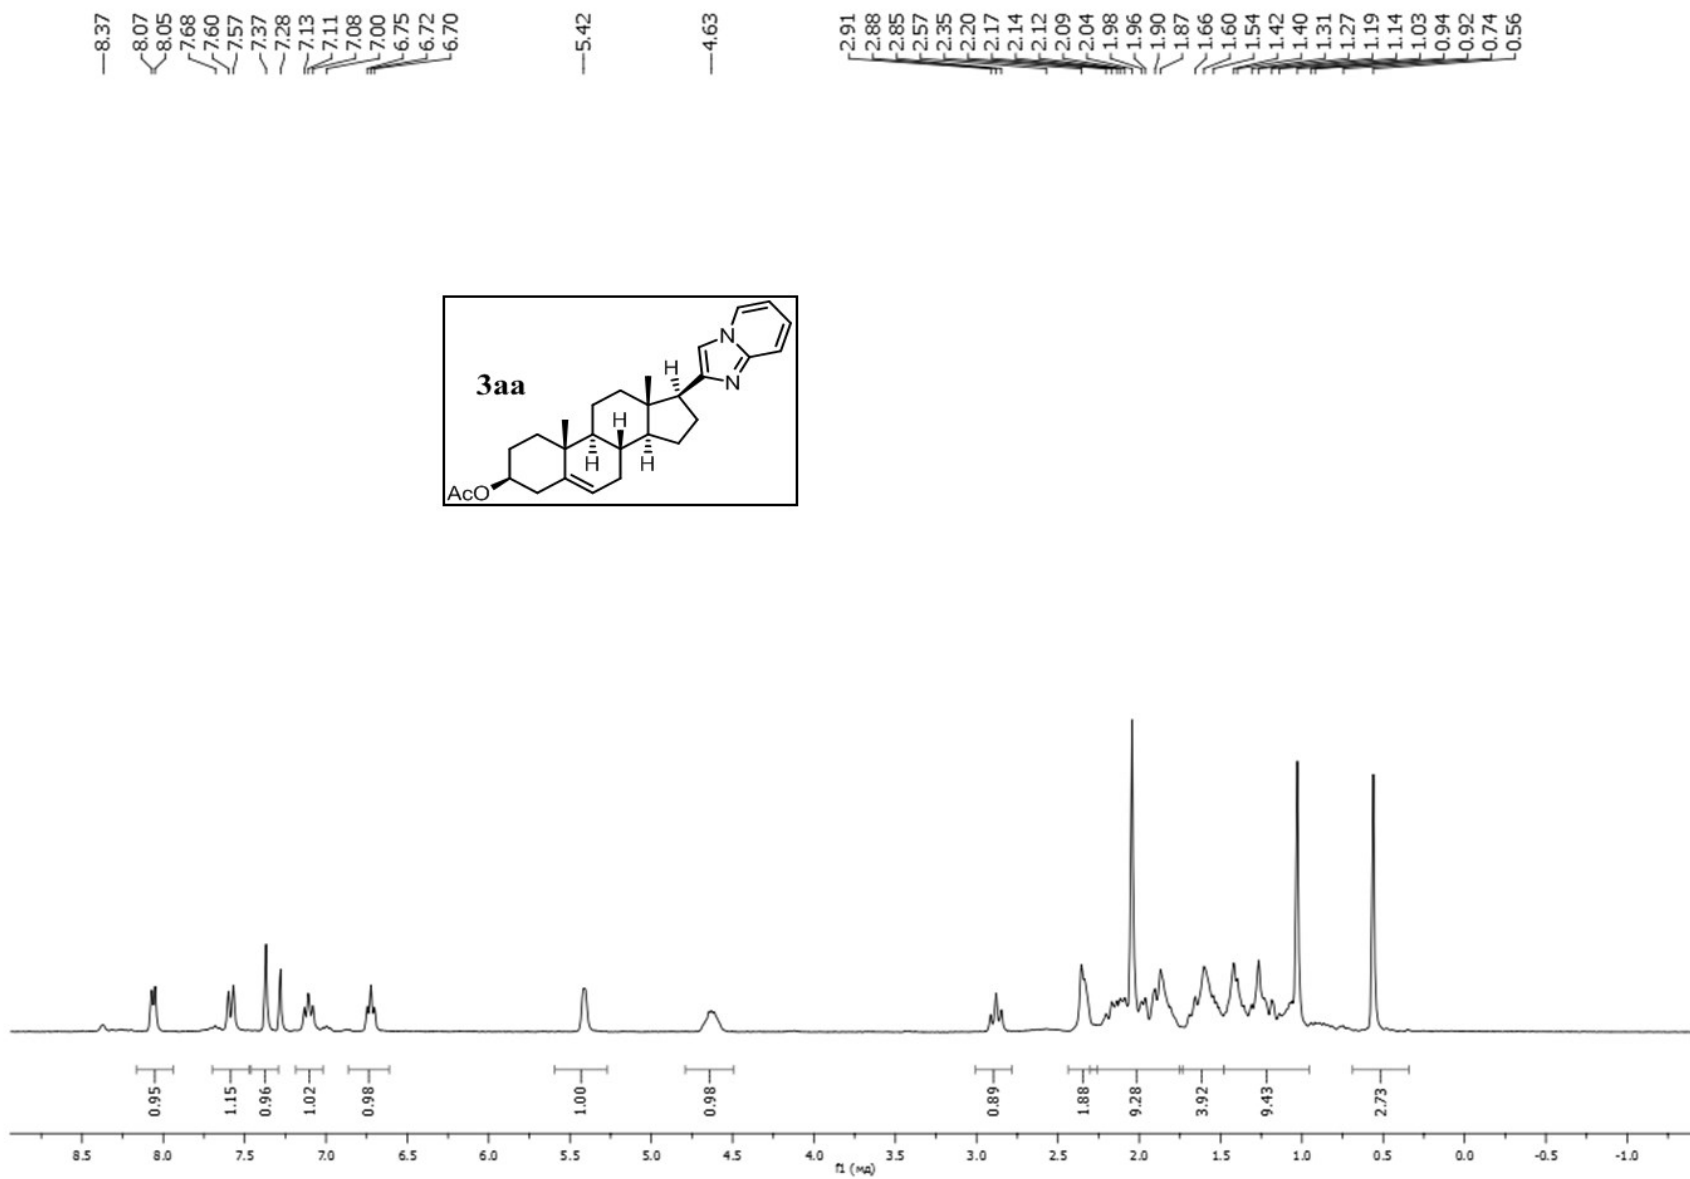

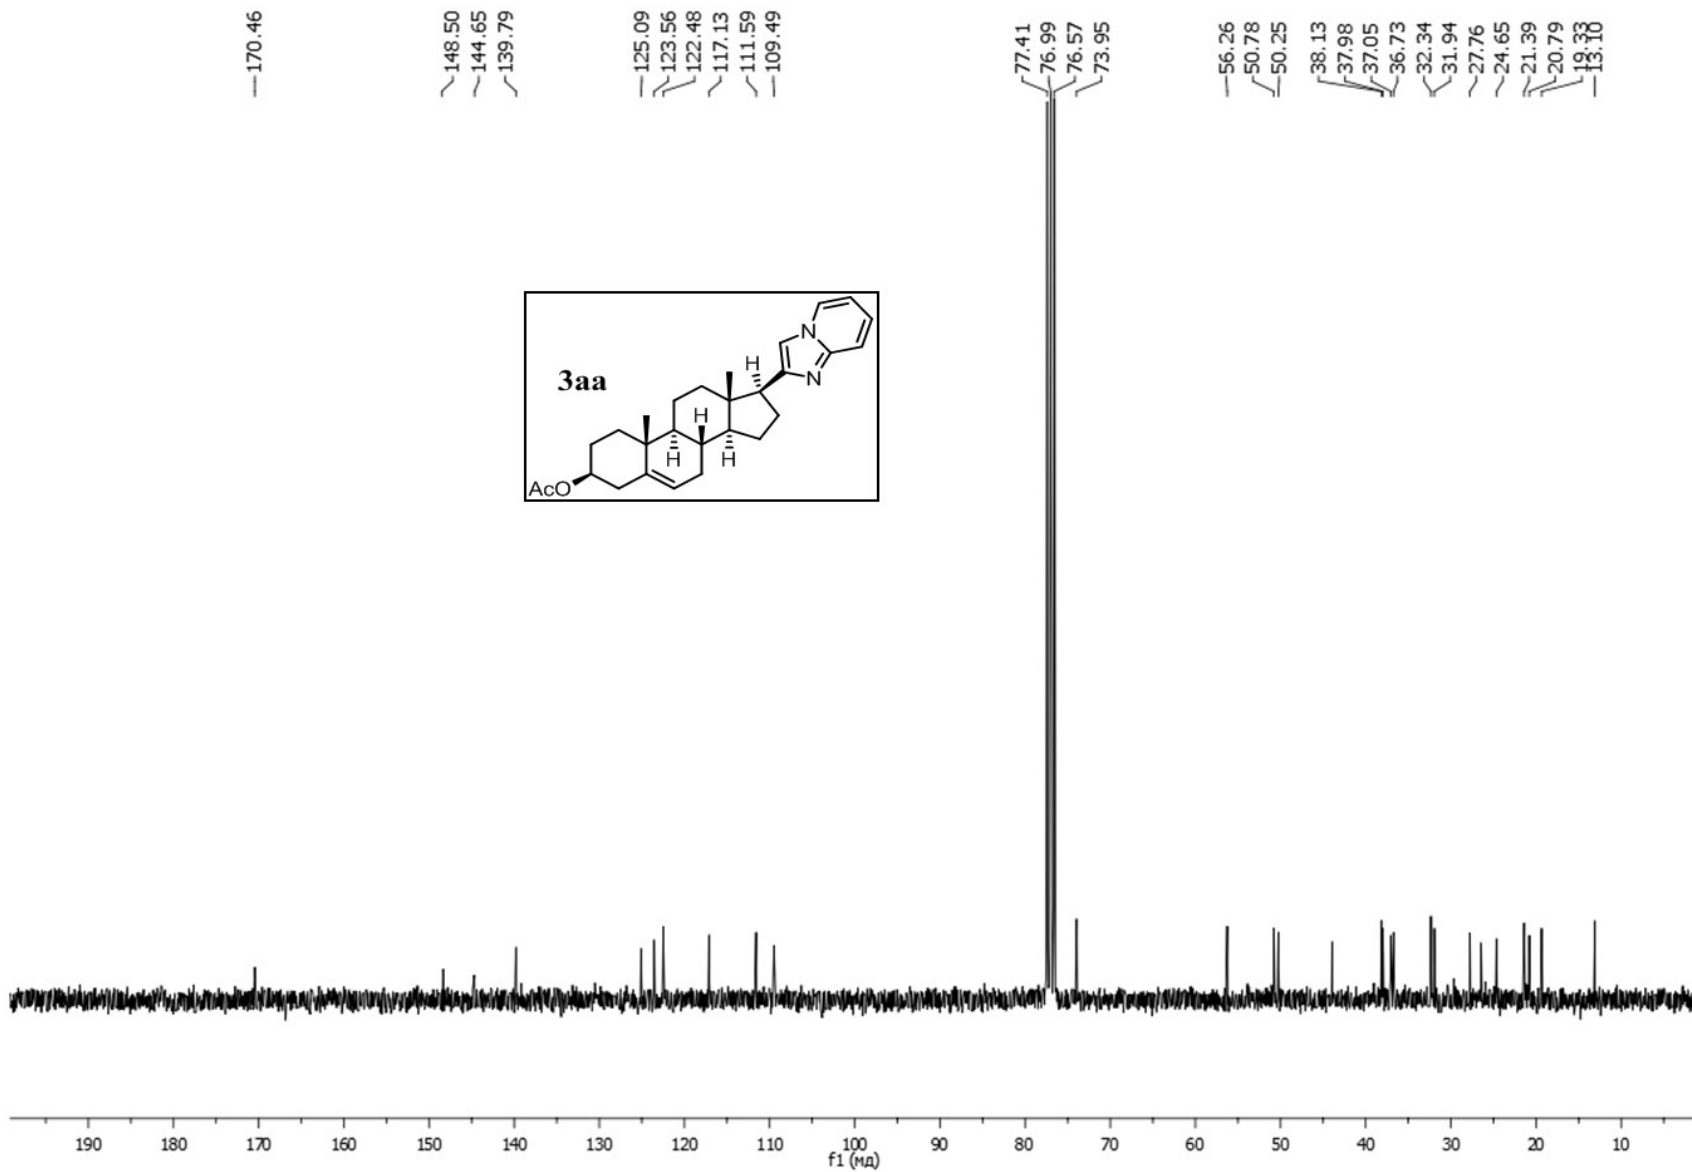

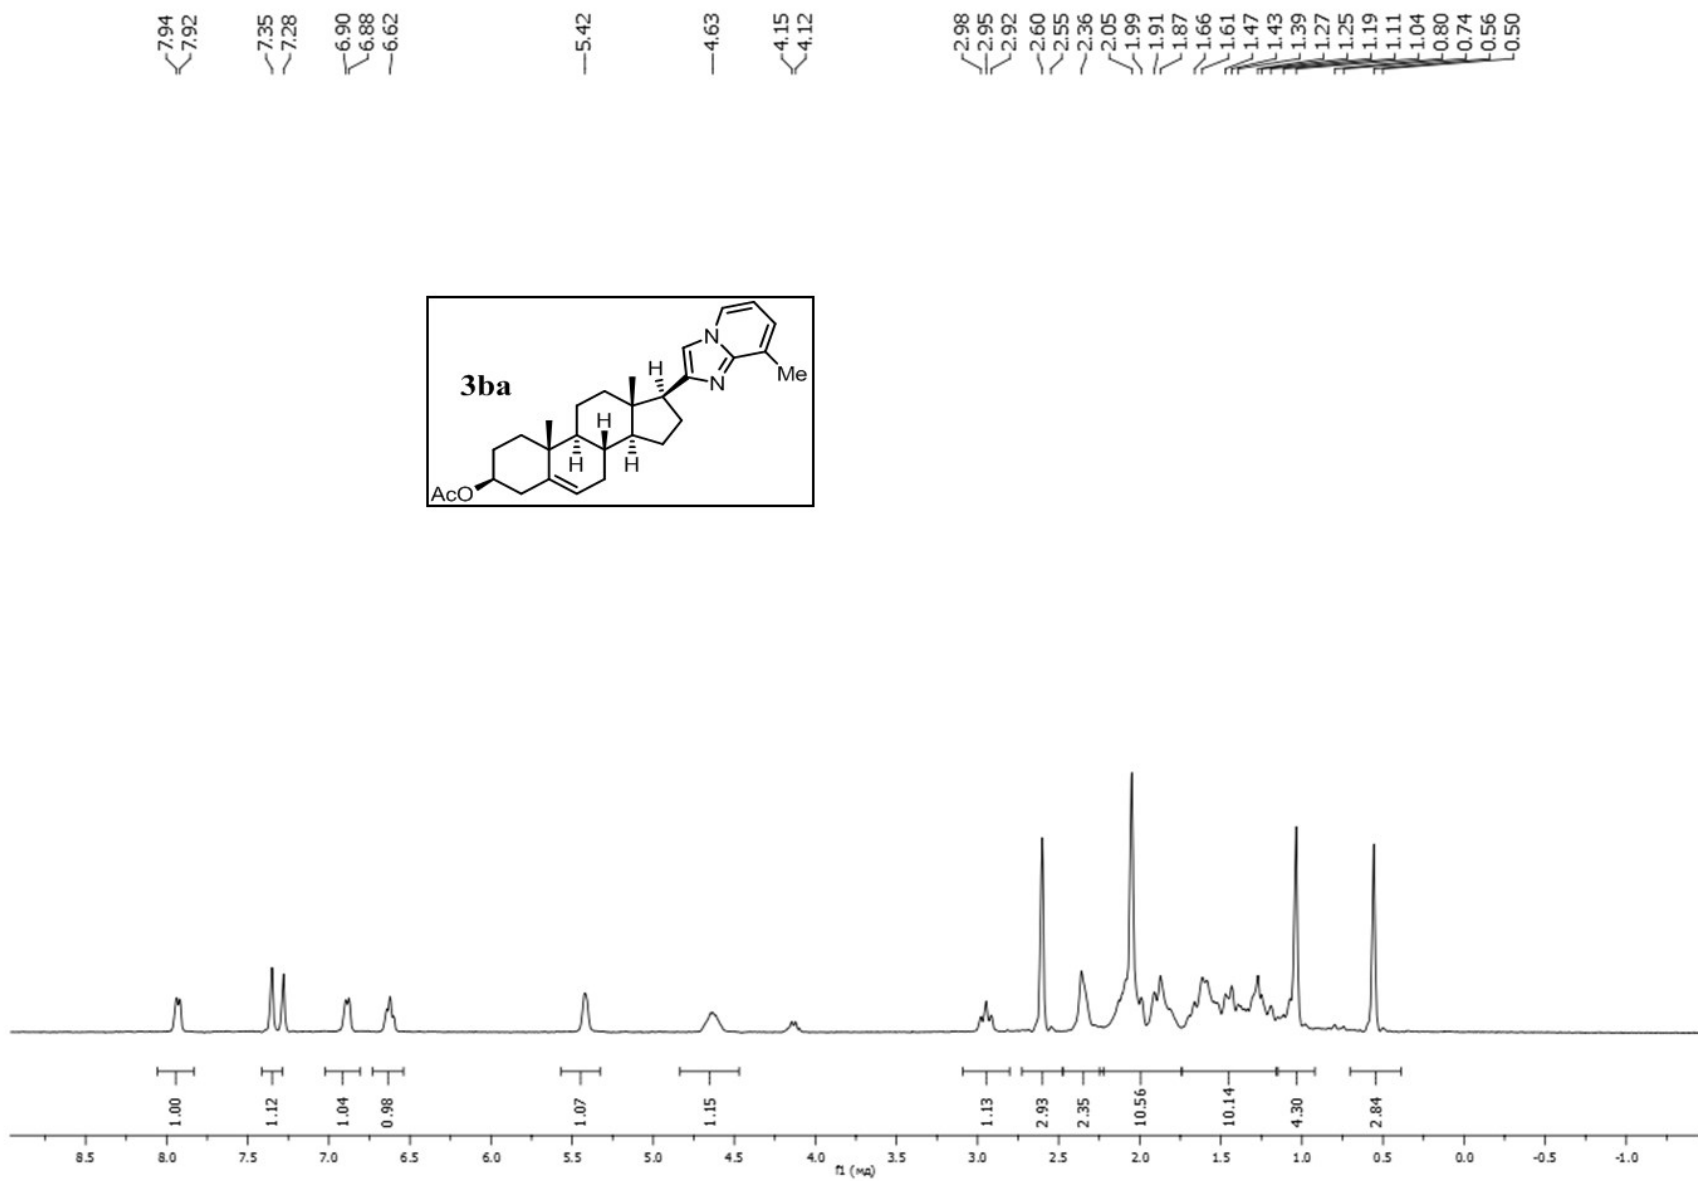



—170.45

~147.54  
~144.87  
~139.80

~126.82  
~123.04  
~122.60  
~122.49

~111.64  
~109.73

~77.45  
~77.03  
~76.60  
~73.97

~56.23  
~50.67  
~50.25  
~43.84  
~38.14  
~37.77  
~37.04  
~36.73  
~32.40  
~31.94  
~27.77  
~26.90  
~24.68  
~21.39  
~20.81  
~19.34  
~17.15  
~13.12

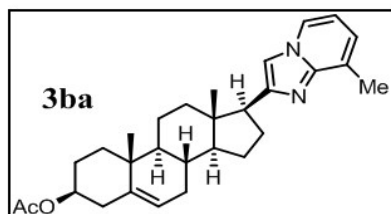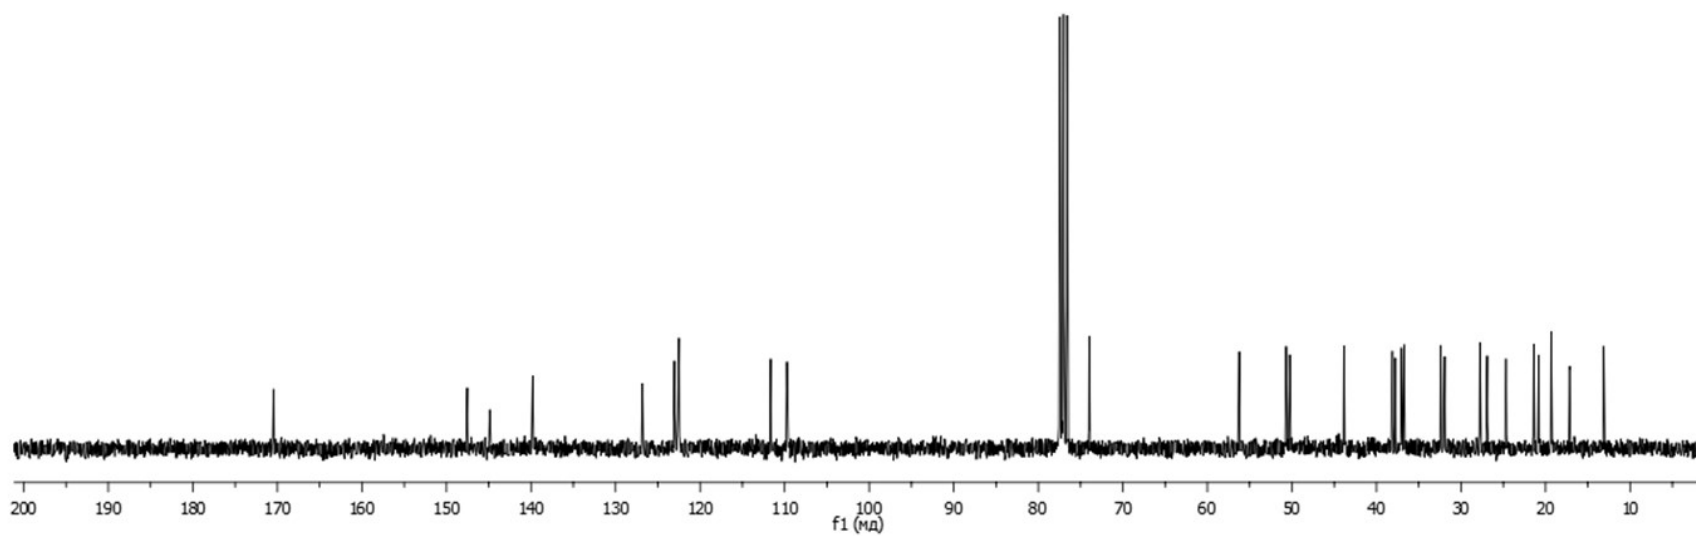

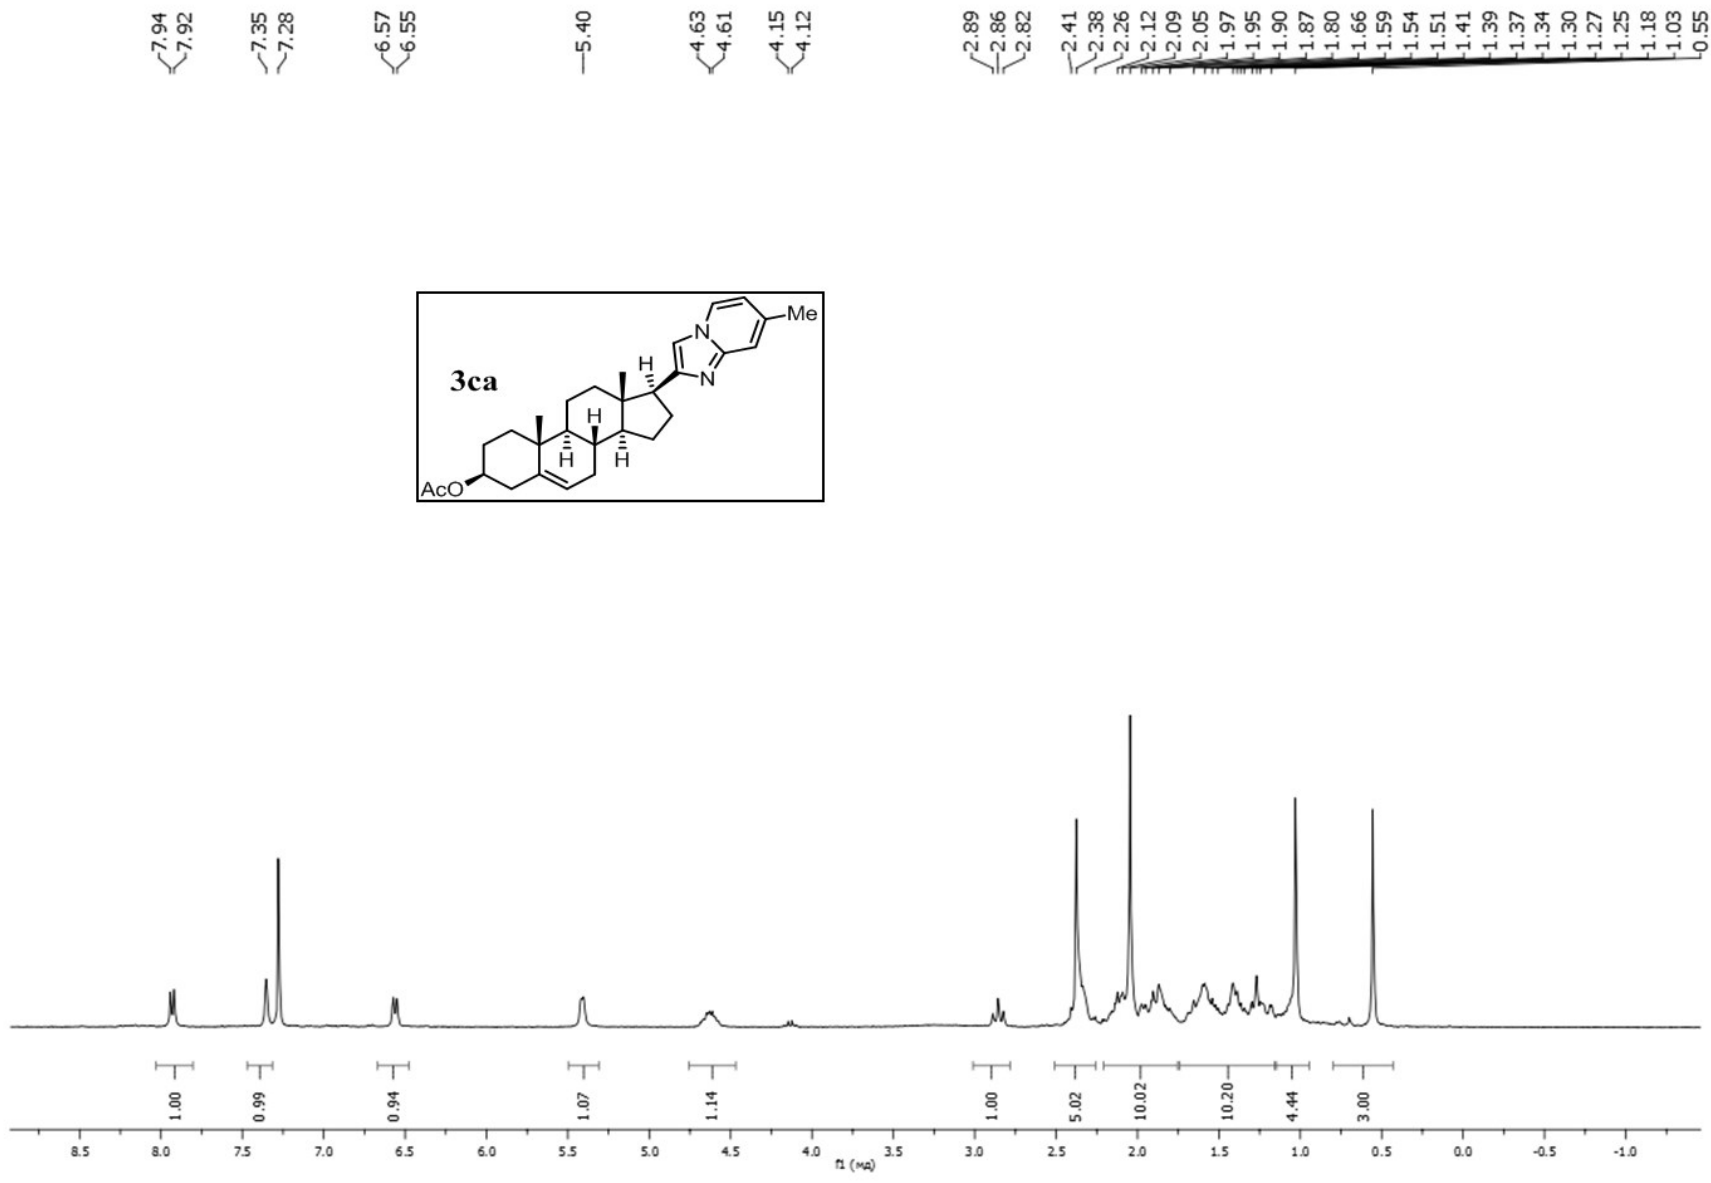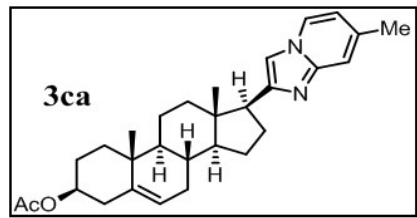

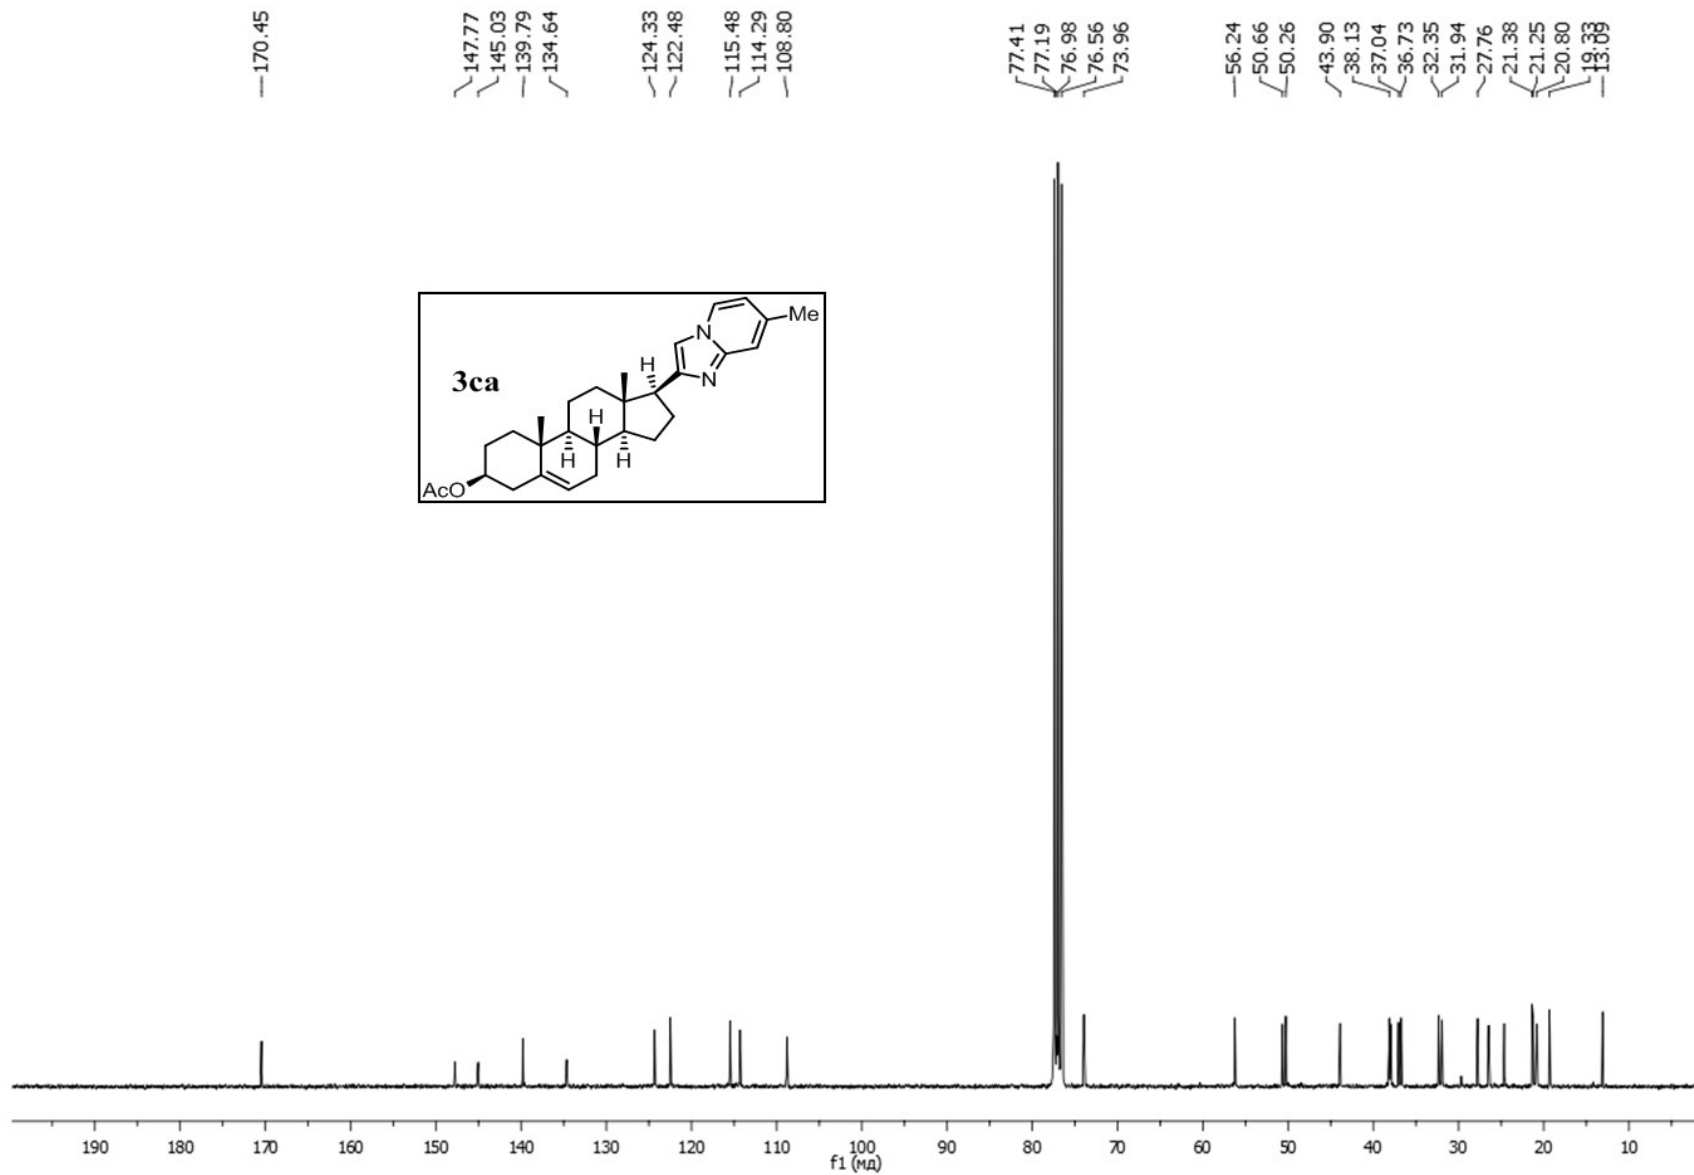

7.80  
7.45  
7.42  
7.24  
6.92  
6.89

5.37  
5.36

4.61  
4.59  
4.57

2.85  
2.81  
2.78

2.32  
2.30  
2.25  
2.12  
2.06  
2.01  
2.00  
1.54  
1.37  
1.34  
1.25  
1.23  
1.20  
1.01  
0.99  
0.51

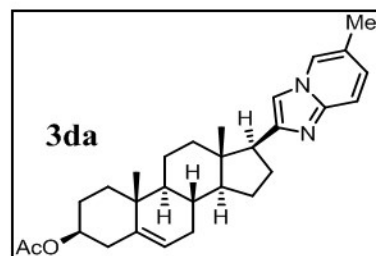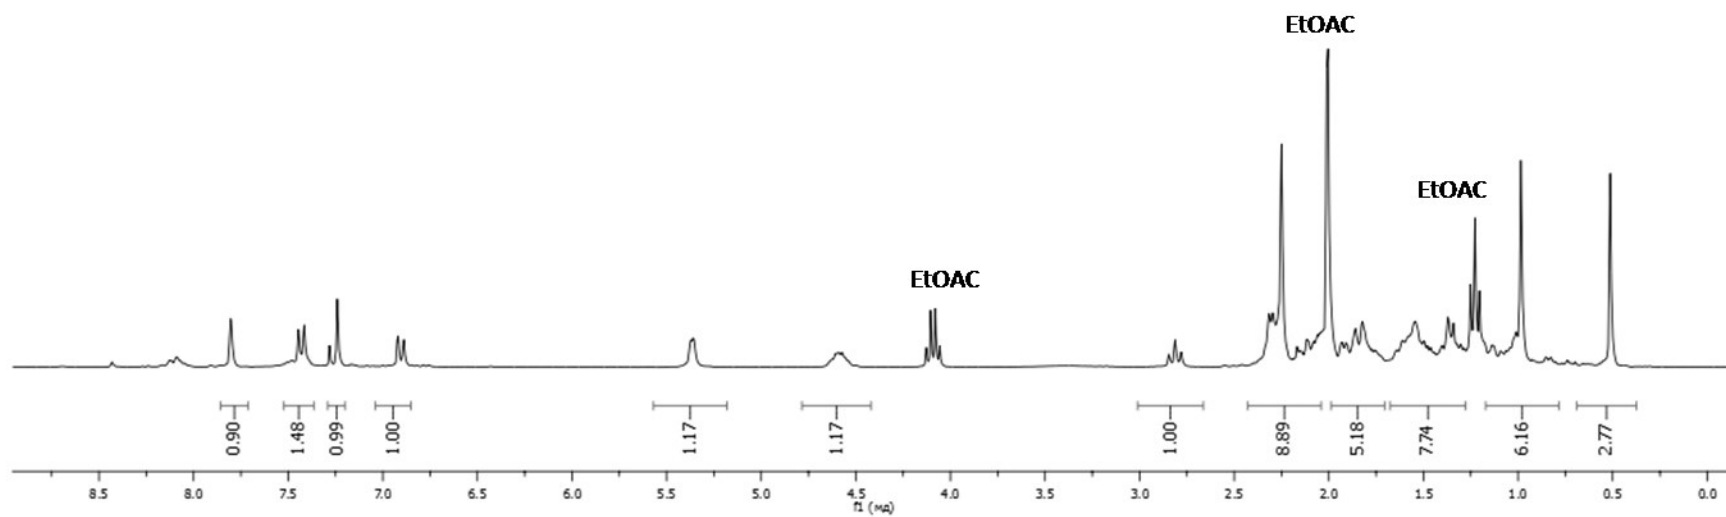

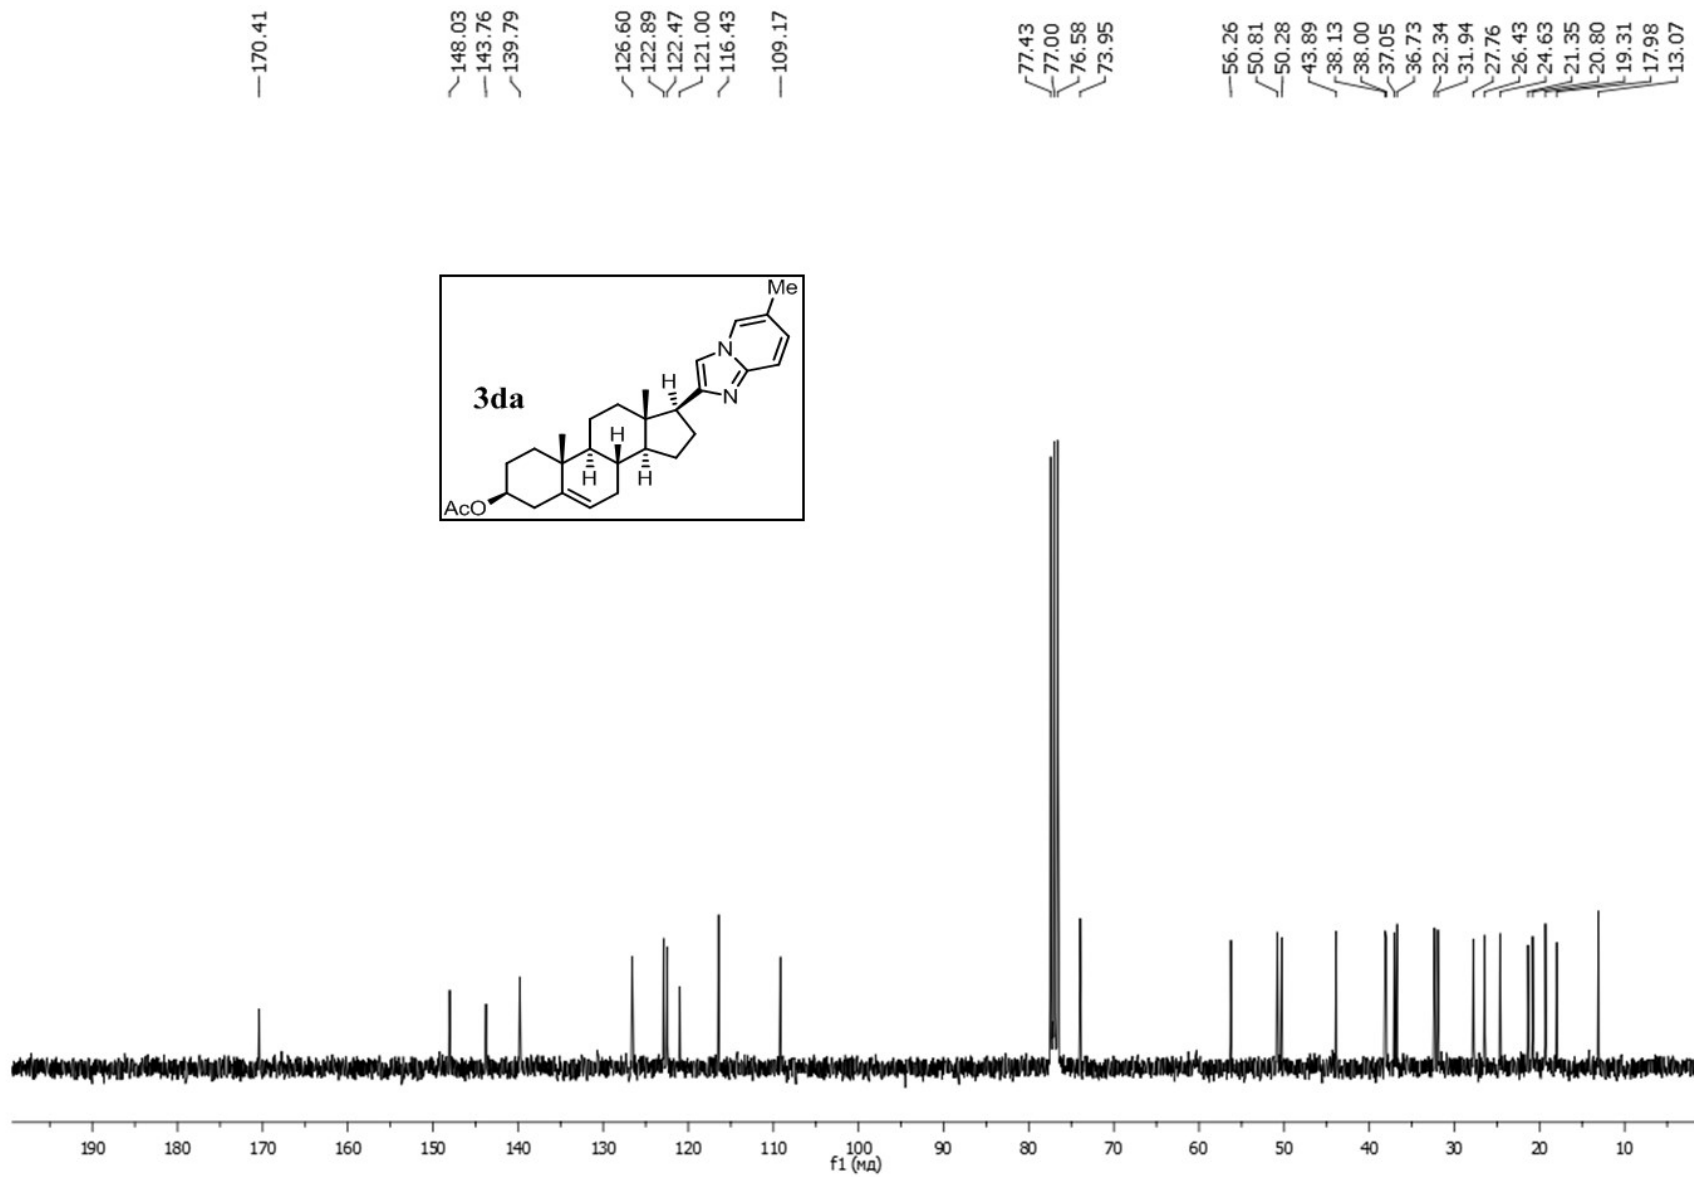

7.66  
7.53  
7.50  
7.28  
7.24  
7.13  
7.10  
7.07  
6.59  
6.57

5.42

4.62

2.92  
2.88

2.58  
2.53  
2.37  
2.23  
2.05  
1.88  
1.62  
1.44  
1.27  
1.04  
0.90  
0.58

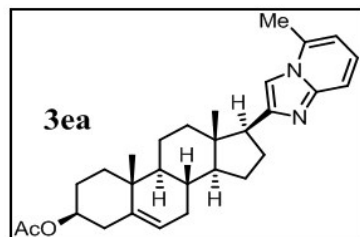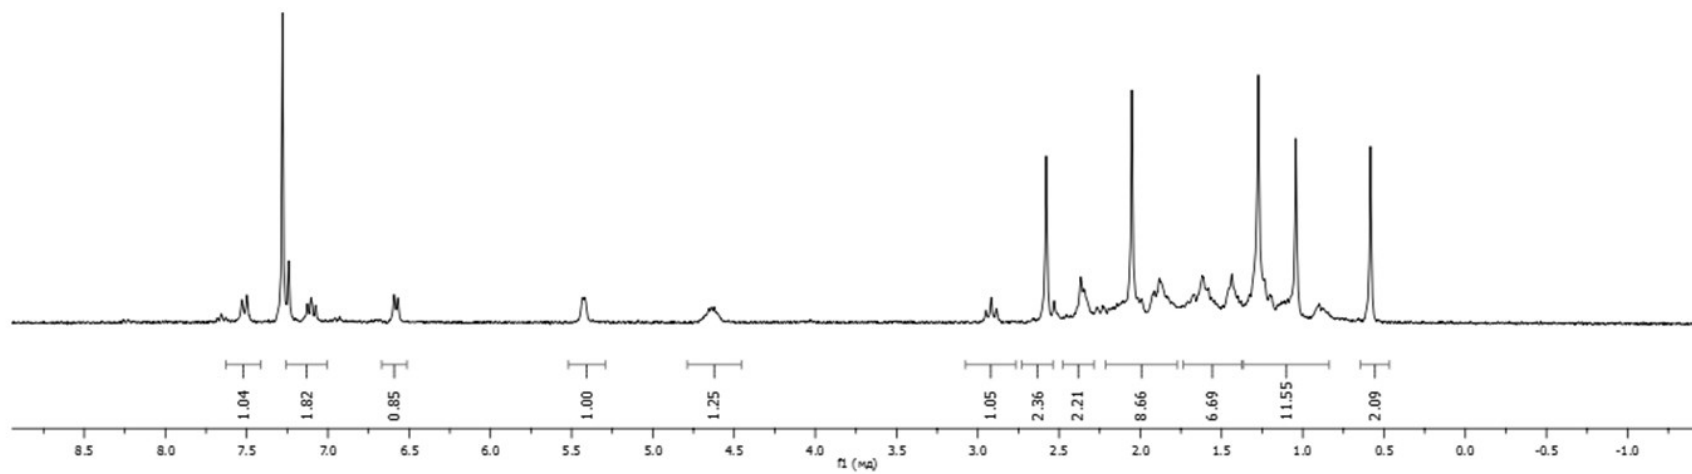

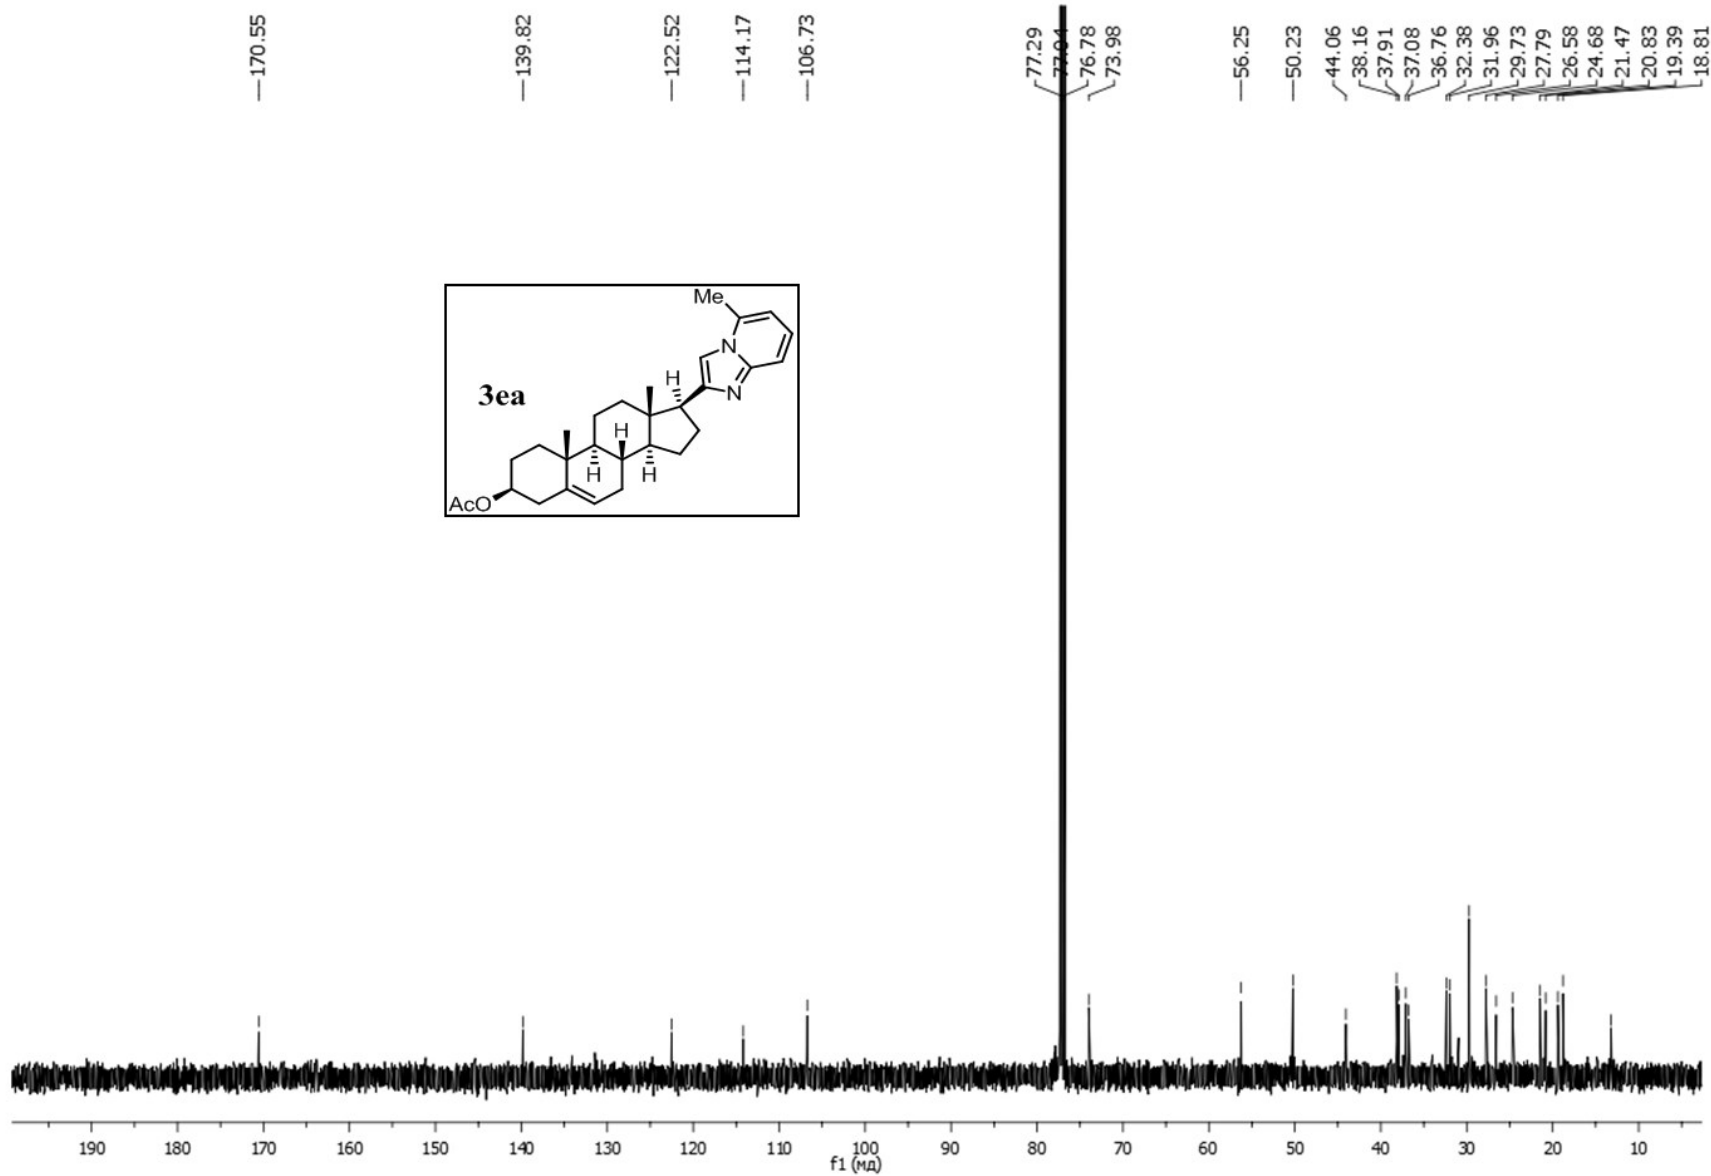

<sup>1</sup>H of VBSS-148-27

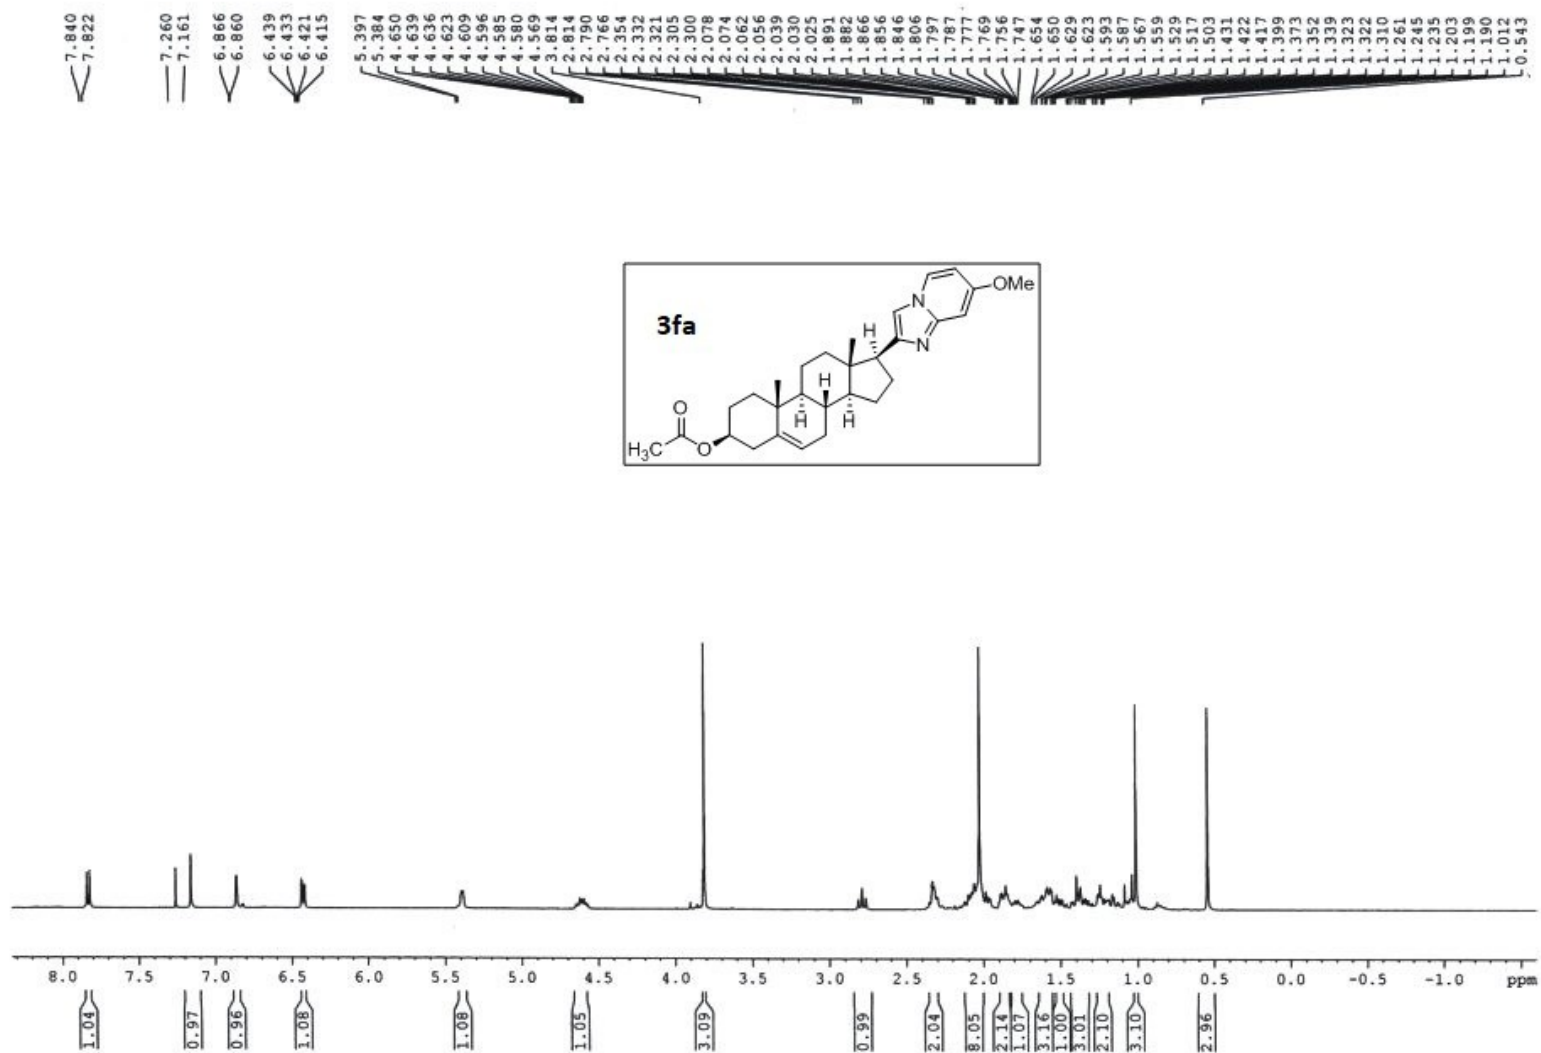



13C of VBSS-148-27

170.68  
157.42  
147.99  
146.20  
139.91  
125.65  
122.66  
108.26  
106.67  
94.68  
77.47  
77.15  
76.84  
74.12  
56.34  
55.51  
50.80  
50.38  
43.95  
38.26  
38.17  
37.17  
36.86  
32.46  
32.08  
27.90  
26.49  
24.76  
21.57  
20.94  
19.48  
13.23

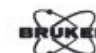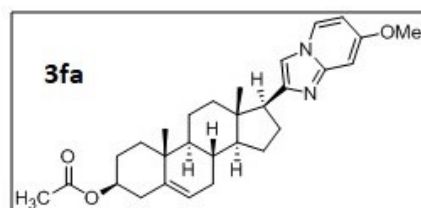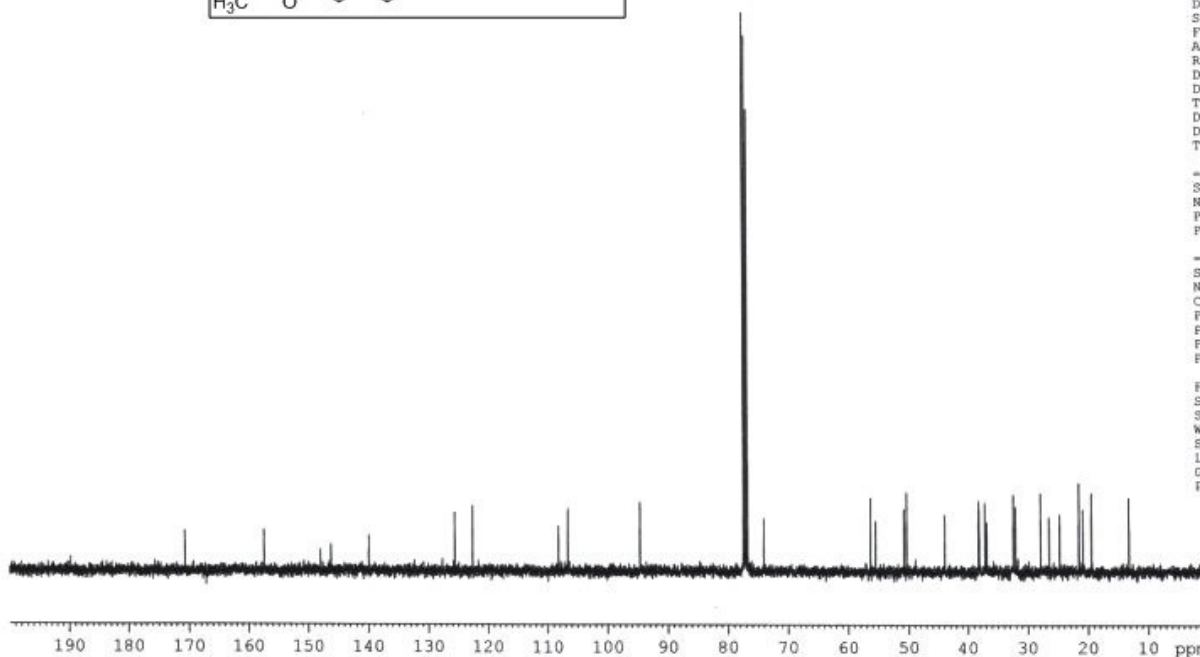

Current Data Parameters  
NAME Dr. A HAJRA 2018-2nd  
EXPNO 305  
PROCNO 1

F2 - Acquisition Parameters  
Date\_ 20180416  
Time 19.08  
INSTRUM spect  
PROBHD 5 mm PABBO BB/  
PULPROG zgpg30  
TD 32768  
SOLVENT CDCl3  
NS 180  
DS 2  
SWH 24038.461 Hz  
FIDRES 0.733596 Hz  
AQ 0.6815744 sec  
RG 87.66  
DW 20.800 usec  
DE 6.50 usec  
TE 299.2 K  
D1 2.00000000 sec  
D11 0.03000000 sec  
TDO 1

----- CHANNEL f1 -----  
SFO1 100.6278588 MHz  
NUC1 13C  
P1 8.90 usec  
PLM1 54.00000000 W

----- CHANNEL f2 -----  
SFO2 400.1516006 MHz  
NUC2 1H  
CPDPRG[2] waltz16  
PCPD2 90.00 usec  
PLW2 12.00000000 W  
PLW12 0.32231000 W  
PLW13 0.16212000 W

F2 - Processing parameters  
SI 16384  
SF 100.6171844 MHz  
WDW EM  
SSB 0  
LB 1.00 Hz  
GB 0  
PC 1.40

<sup>1</sup>H of VBSS 148-

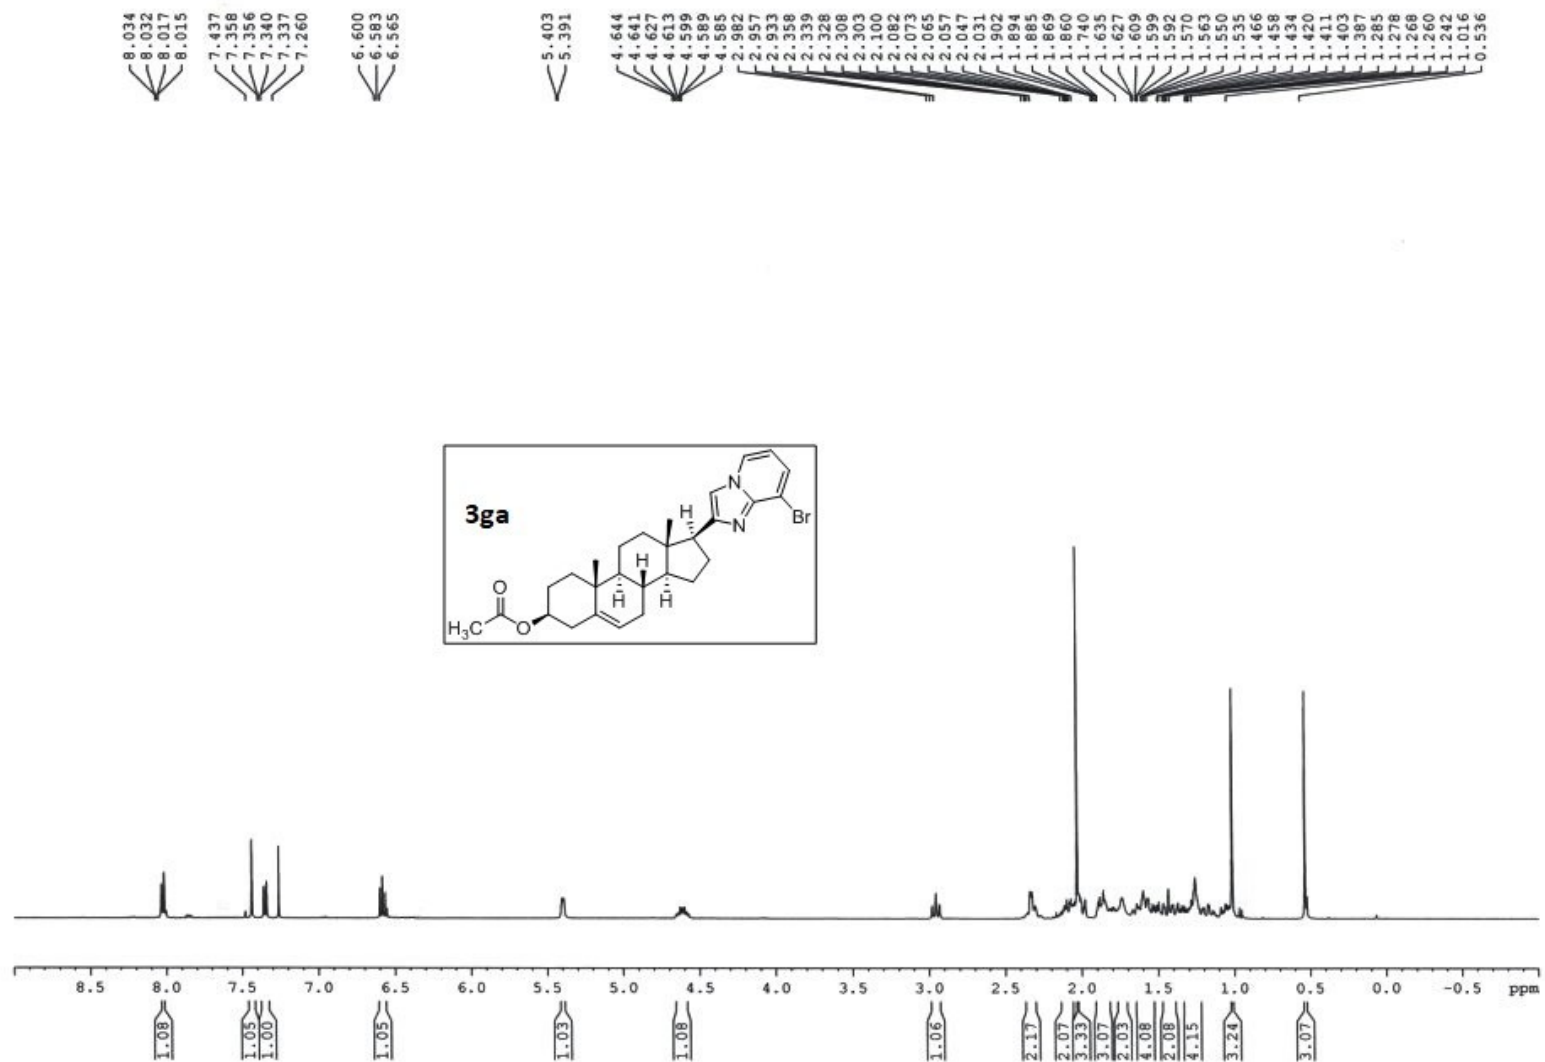

13C of VBSS-148-

170.69  
 149.57  
 142.70  
 139.95  
 126.19  
 124.64  
 122.64  
 115.22  
 111.73  
 111.27  
 77.48  
 77.16  
 76.84  
 74.12  
 56.37  
 50.84  
 50.34  
 44.12  
 38.28  
 37.86  
 37.16  
 36.87  
 32.52  
 32.07  
 27.91  
 26.92  
 24.83  
 21.59  
 20.93  
 19.50  
 13.31

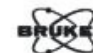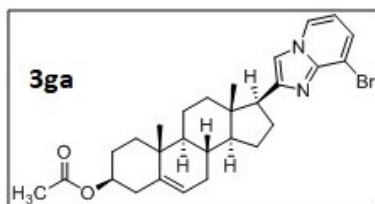

Current Data Parameters  
 NAME Dr.A.HAJRA 2017  
 EXPNO 1906  
 PROCNO 1

F2 - Acquisition Parameters  
 Date\_ 20171114  
 Time 14.21  
 INSTRUM spect  
 PROBHD 5 mm PABBO BB/  
 PULPROG zgdc  
 TD 32768  
 SOLVENT CDCl3  
 NS 640  
 DS 2  
 SMH 24038.461 Hz  
 FIDRES 0.733596 Hz  
 AQ 0.6815744 sec  
 RG 186.42  
 DW 20.800 usec  
 DE 6.50 usec  
 TE 296.9 K  
 D1 2.00000000 sec  
 D11 0.03000000 sec  
 TDO 1

----- CHANNEL f1 -----  
 SFO1 100.6278588 MHz  
 NUC1 13C  
 P1 8.90 usec  
 PLW1 54.00000000 W

----- CHANNEL f2 -----  
 SFO2 400.1516006 MHz  
 NUC2 1H  
 CPDPRG[2] waltz16  
 PCPD2 90.00 usec  
 PLW2 12.00000000 W  
 PLW12 0.32231000 W

F2 - Processing parameters  
 SI 16384  
 SF 100.6177838 MHz  
 WDW EM  
 SSB 0  
 LB 1.00 Hz  
 GB 0  
 PC 1.40

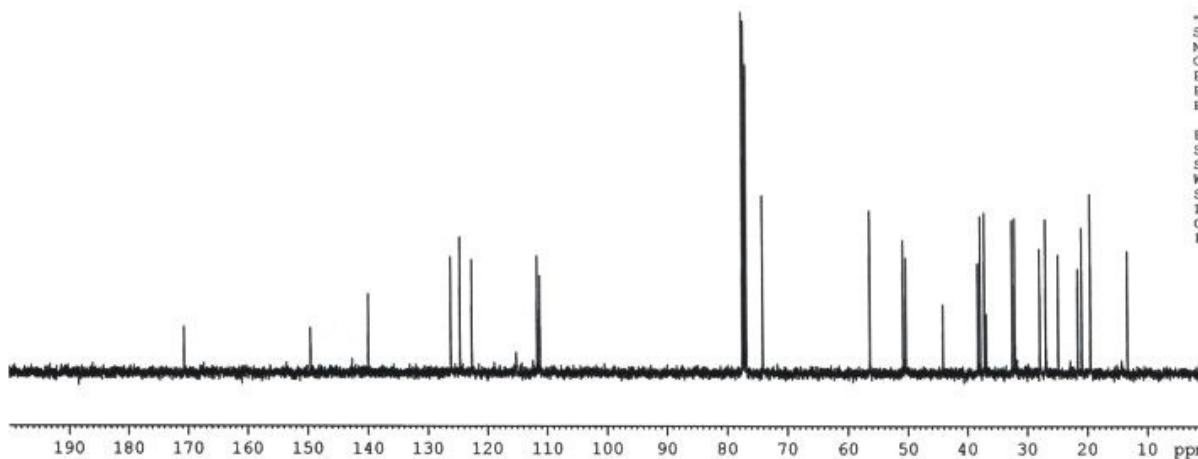

<sup>1</sup>H of VBSS-148-Cl-7

8.090  
7.508  
7.485  
7.326  
7.259  
7.070  
7.065  
7.046  
7.041

5.396  
5.384

4.649  
4.638  
4.622  
4.608  
4.595  
4.583  
4.568

2.862  
2.838  
2.813  
2.813  
2.832  
2.322  
2.304  
2.299  
2.158  
2.125  
2.103  
2.087  
2.063  
2.026  
1.938  
1.917  
1.887  
1.878  
1.854  
1.844  
1.794  
1.658  
1.632  
1.588  
1.567  
1.559  
1.466  
1.393  
1.371  
1.356  
1.340  
1.276  
1.257  
1.250  
1.231  
1.199  
1.190  
1.165  
1.156  
1.079  
1.068  
1.051  
1.040  
1.008  
0.766  
0.518

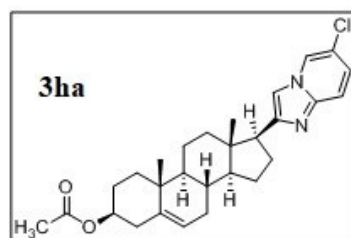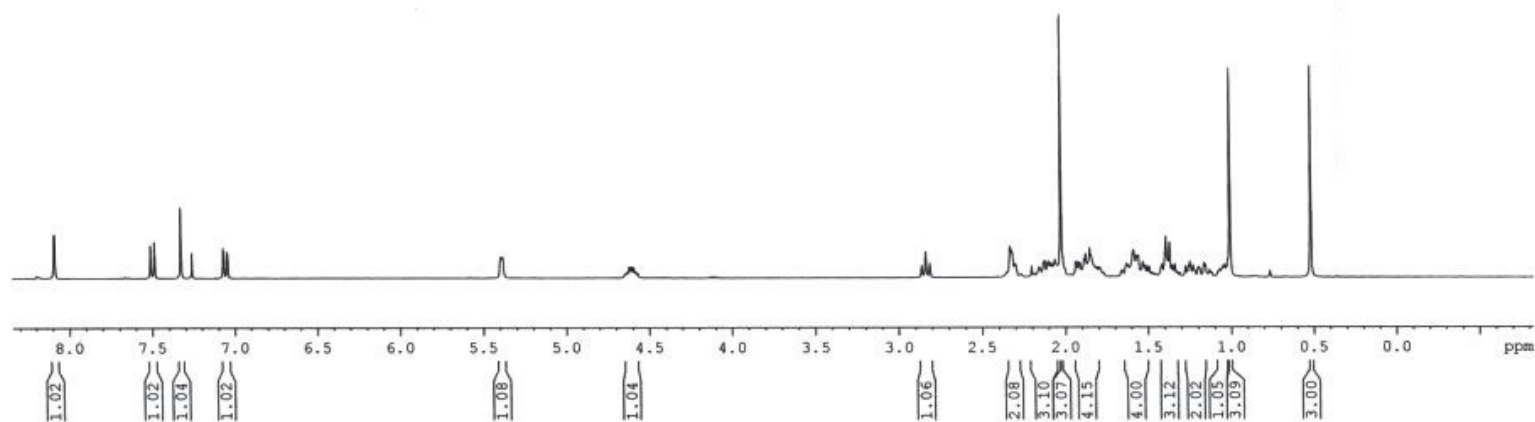

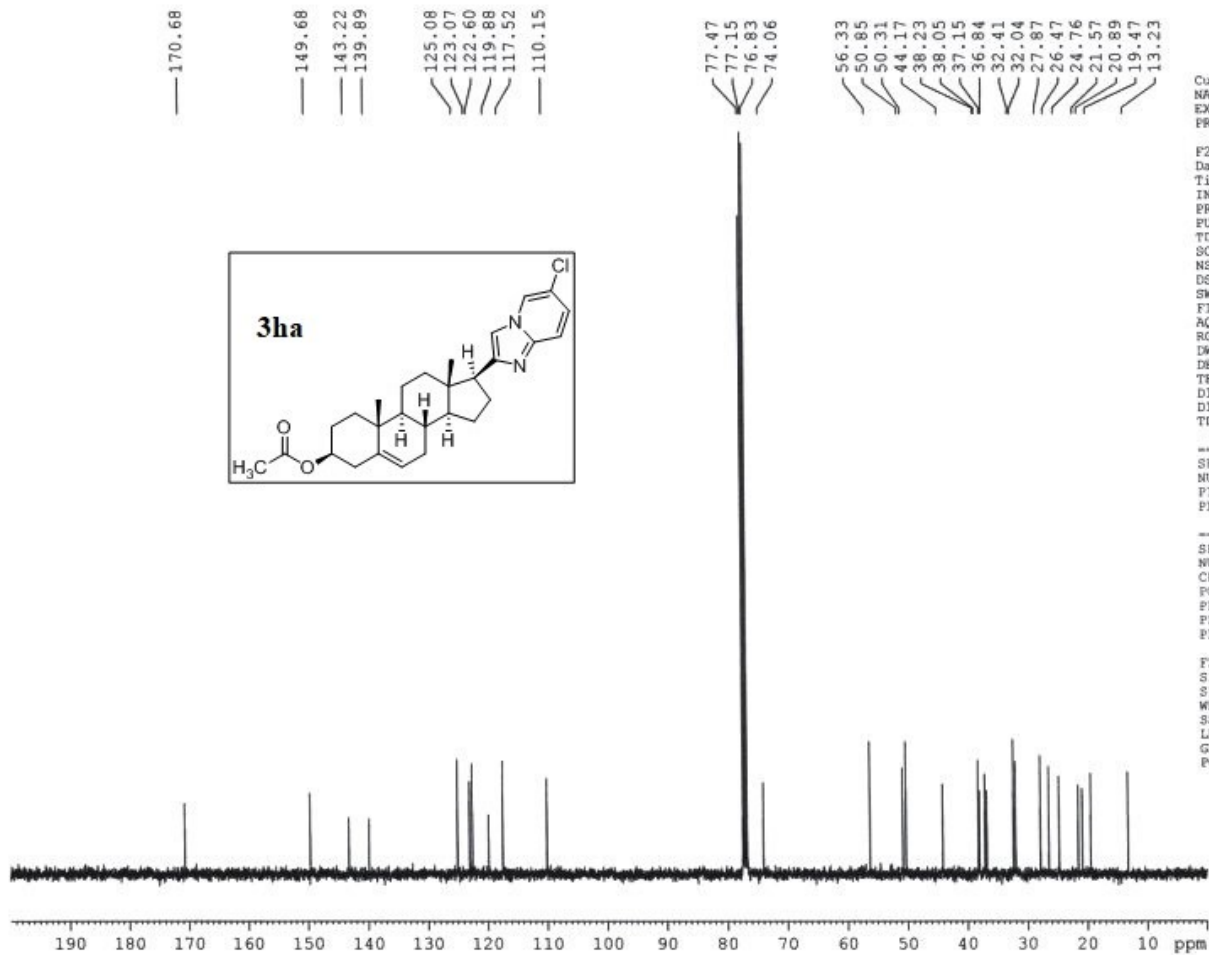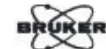

Current Data Parameters  
 NAME Dr. A HARJA-2020-13C  
 EXPNO 76  
 PROCNO 1

F2 - Acquisition Parameters  
 Date\_ 20200229  
 Time 19.25  
 INSTRUM spect  
 PROBHD 5 mm PABBO BB/  
 PULPROG zgpg30  
 TD 32768  
 SOLVENT CDC13  
 NS 320  
 DS 2  
 SWH 24038.461 Hz  
 FIDRES 0.733596 Hz  
 AQ 0.6815744 sec  
 RG 67.81  
 DW 20.800 usec  
 DE 6.50 usec  
 TE 296.2 K  
 D1 2.00000000 sec  
 D11 0.03000000 sec  
 TDO 1

----- CHANNEL f1 -----  
 SFO1 100.6278588 MHz  
 NUC1 13C  
 P1 8.90 usec  
 PLW1 54.00000000 W

----- CHANNEL f2 -----  
 SFO2 400.1516006 MHz  
 NUC2 1H  
 CPDPRG2 waltz16  
 PCPD2 90.00 usec  
 PLW2 12.00000000 W  
 PLW12 0.32231000 W  
 PLW13 0.16212000 W

F2 - Processing parameters  
 SI 16384  
 SF 100.6177859 MHz  
 MW EM  
 SSB 0  
 LB 1.00 Hz  
 GB 0  
 PC 1.40

—8.22  
7.51  
7.48  
7.35  
7.28  
7.20  
7.17

—5.41  
—4.62

—2.87  
—2.36  
—2.23  
—2.15  
—2.05  
—1.88  
—1.60  
—1.46  
—1.42  
—1.27  
—1.04  
—0.90  
—0.55

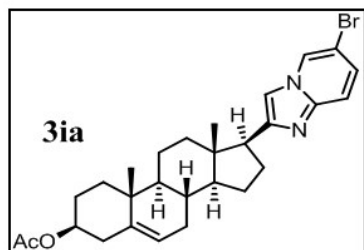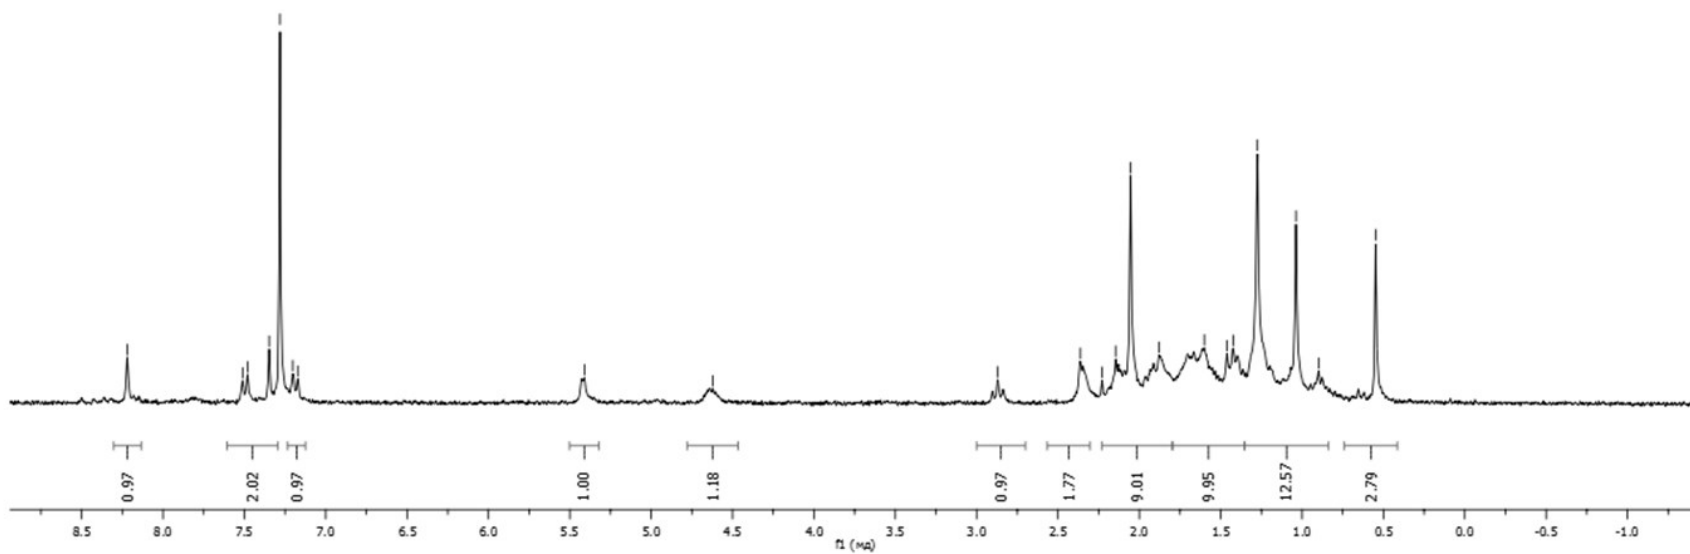

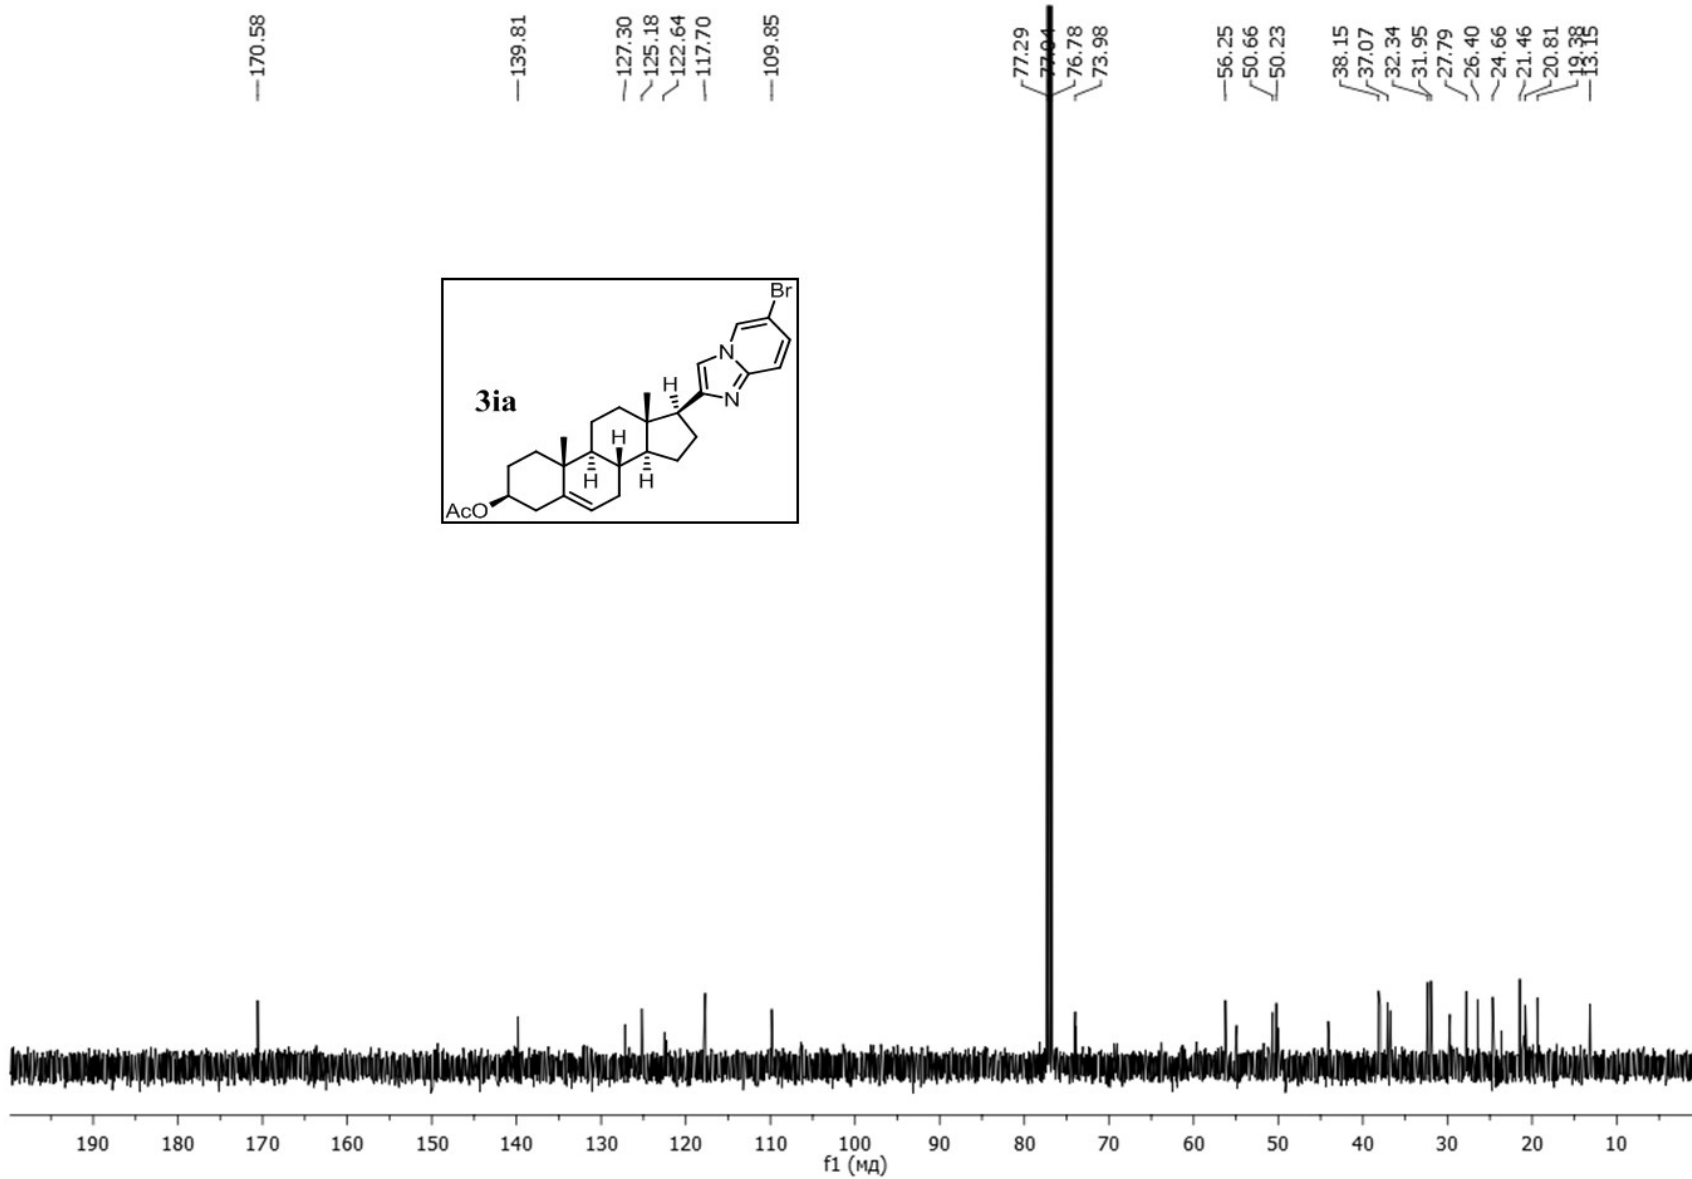

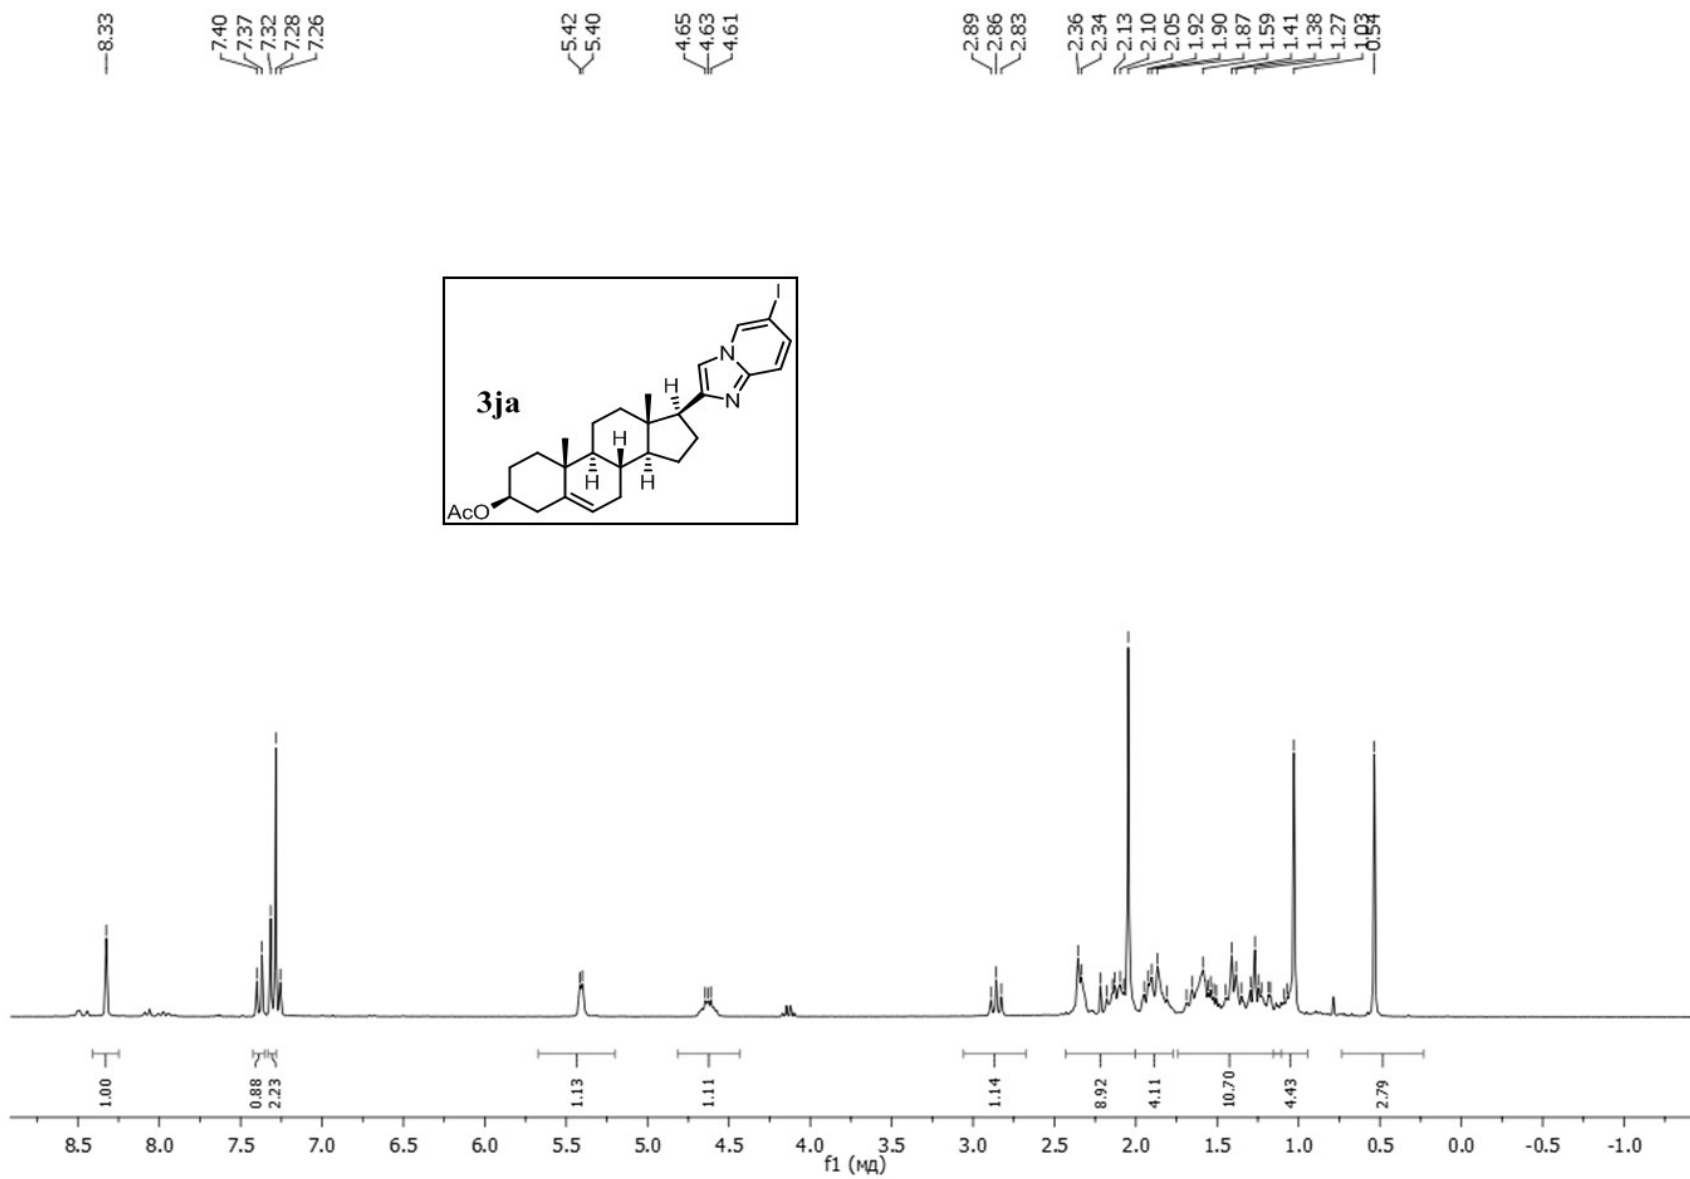



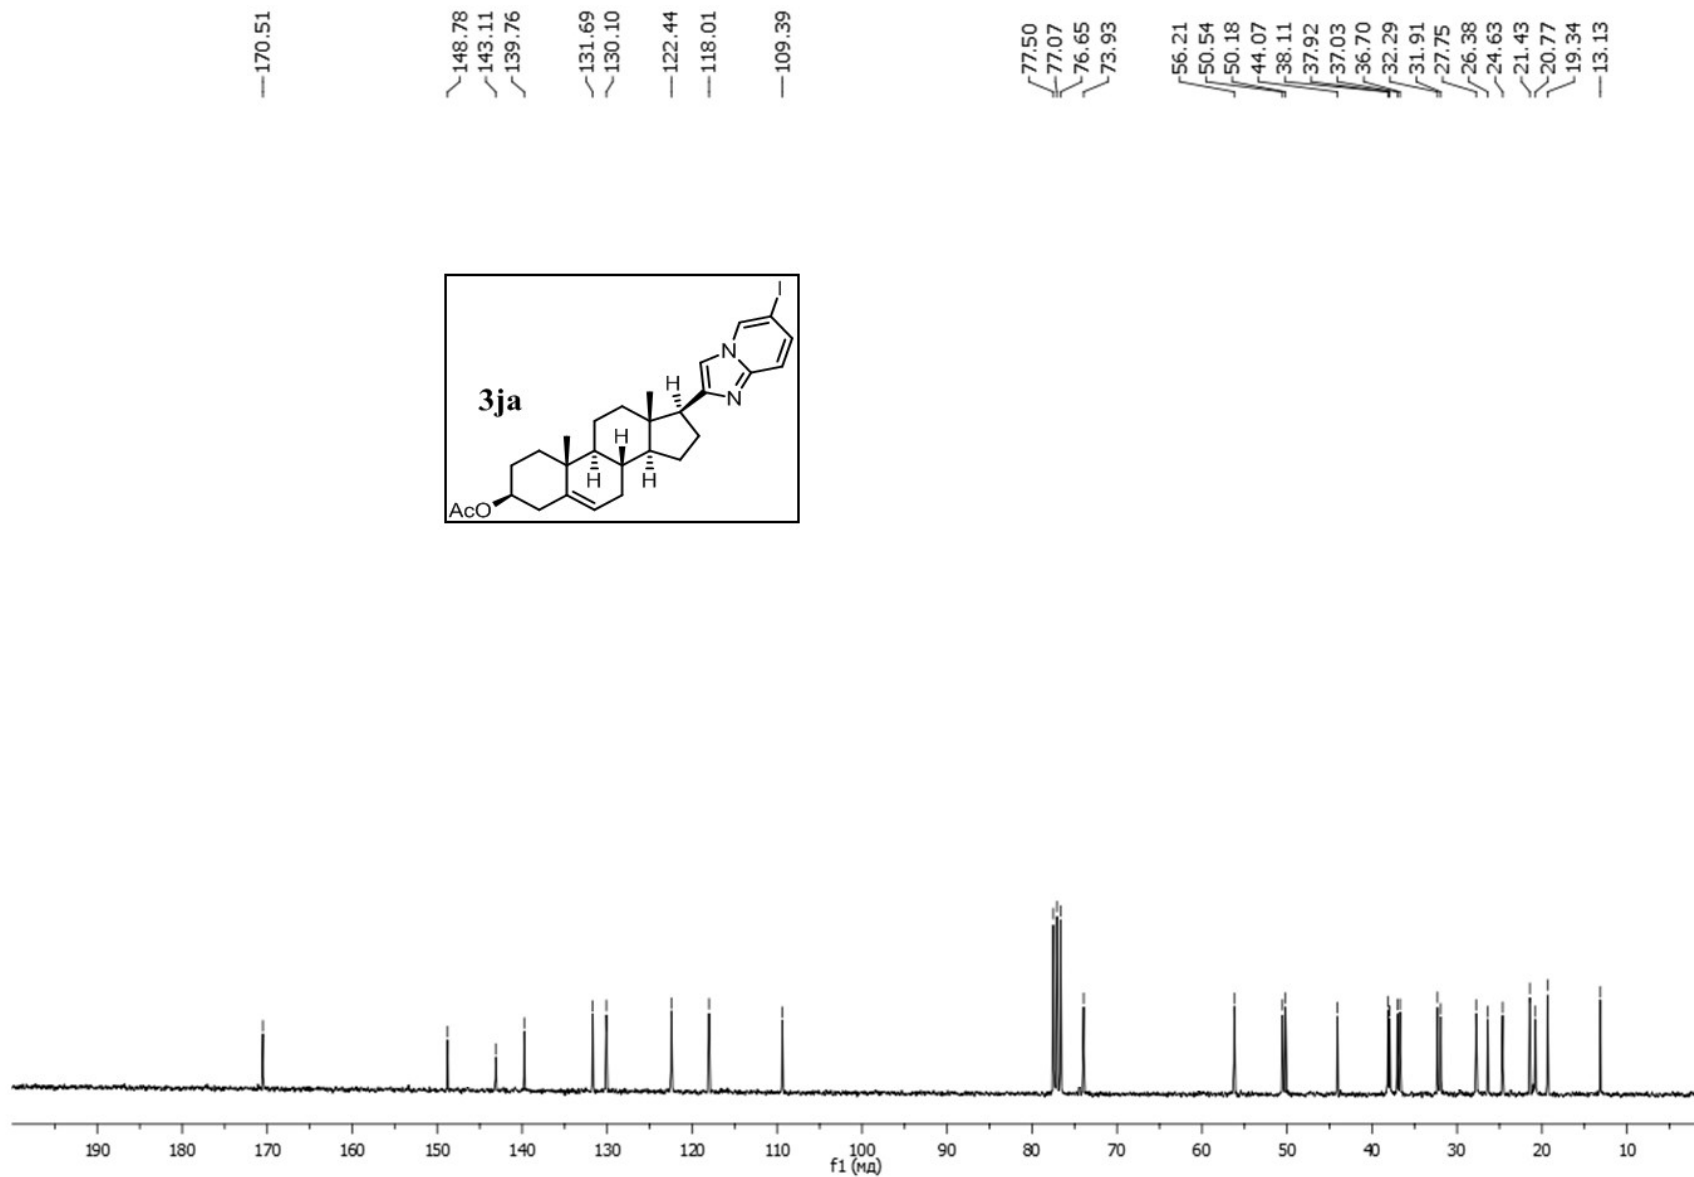

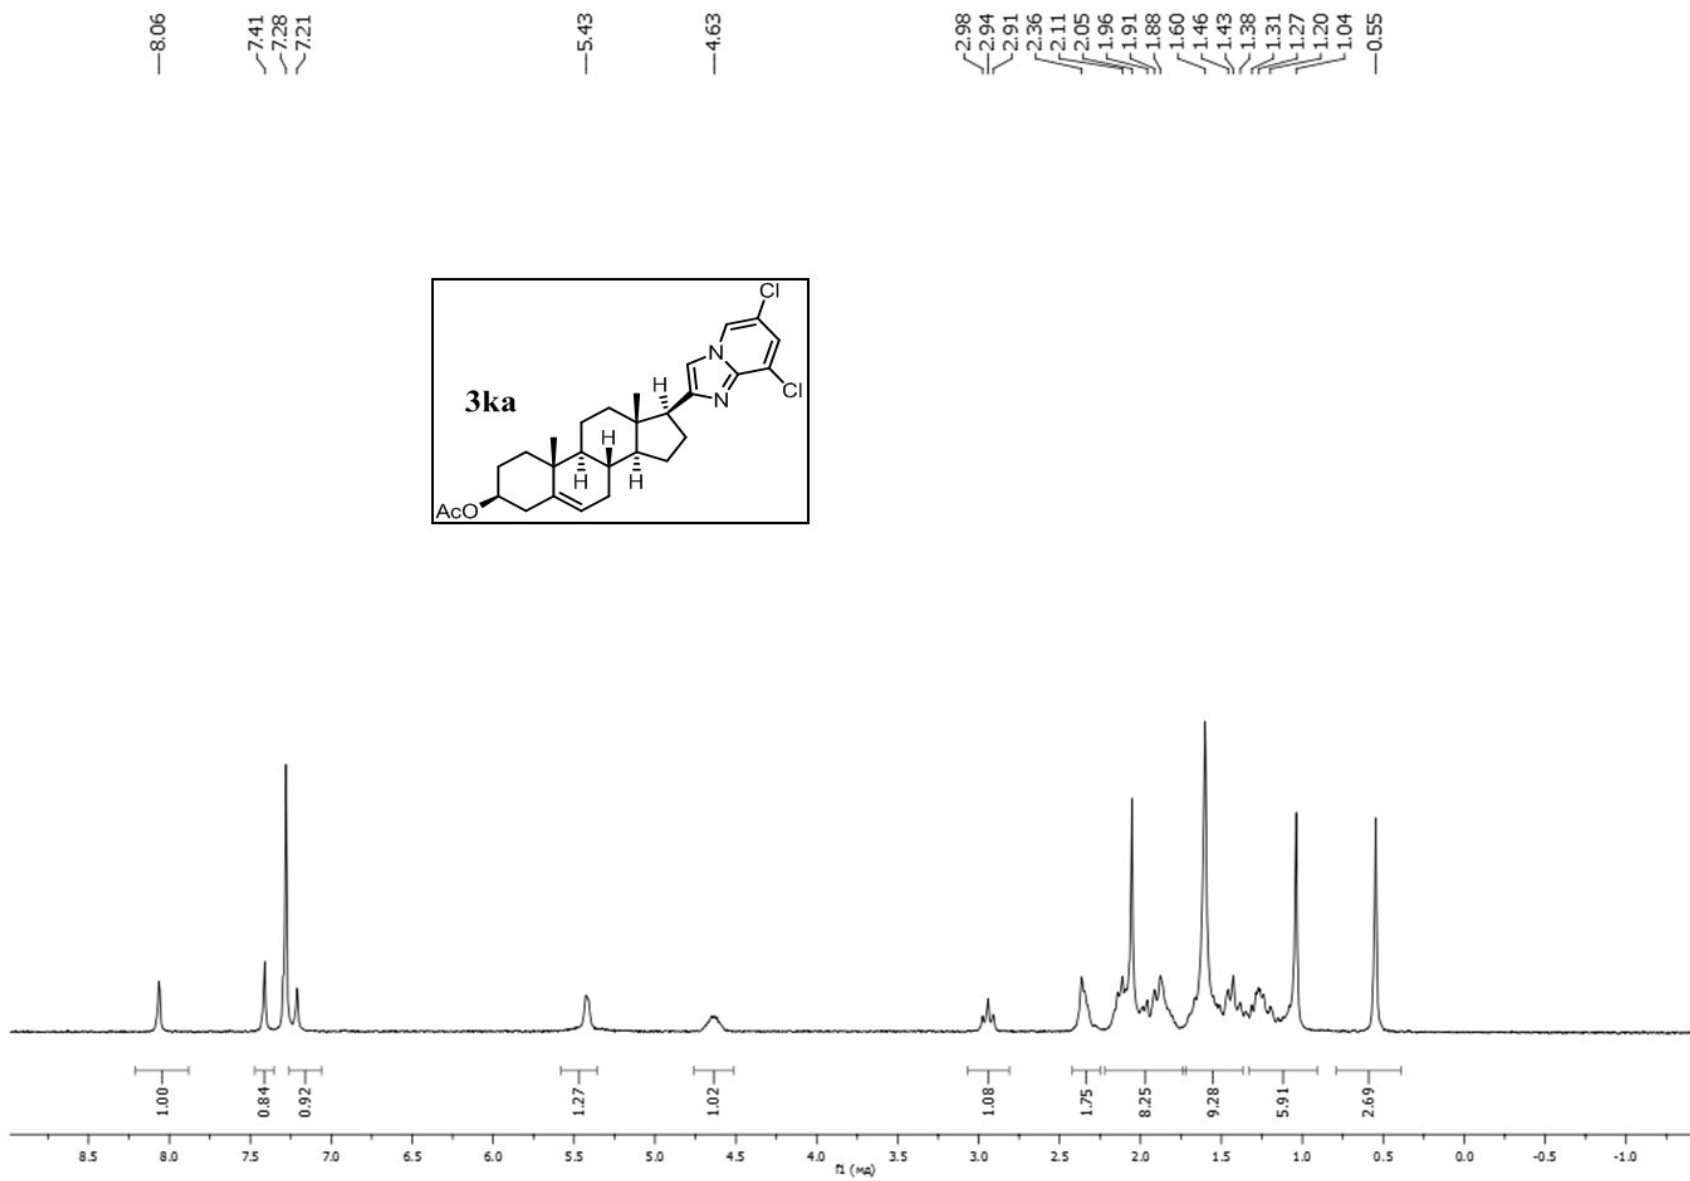

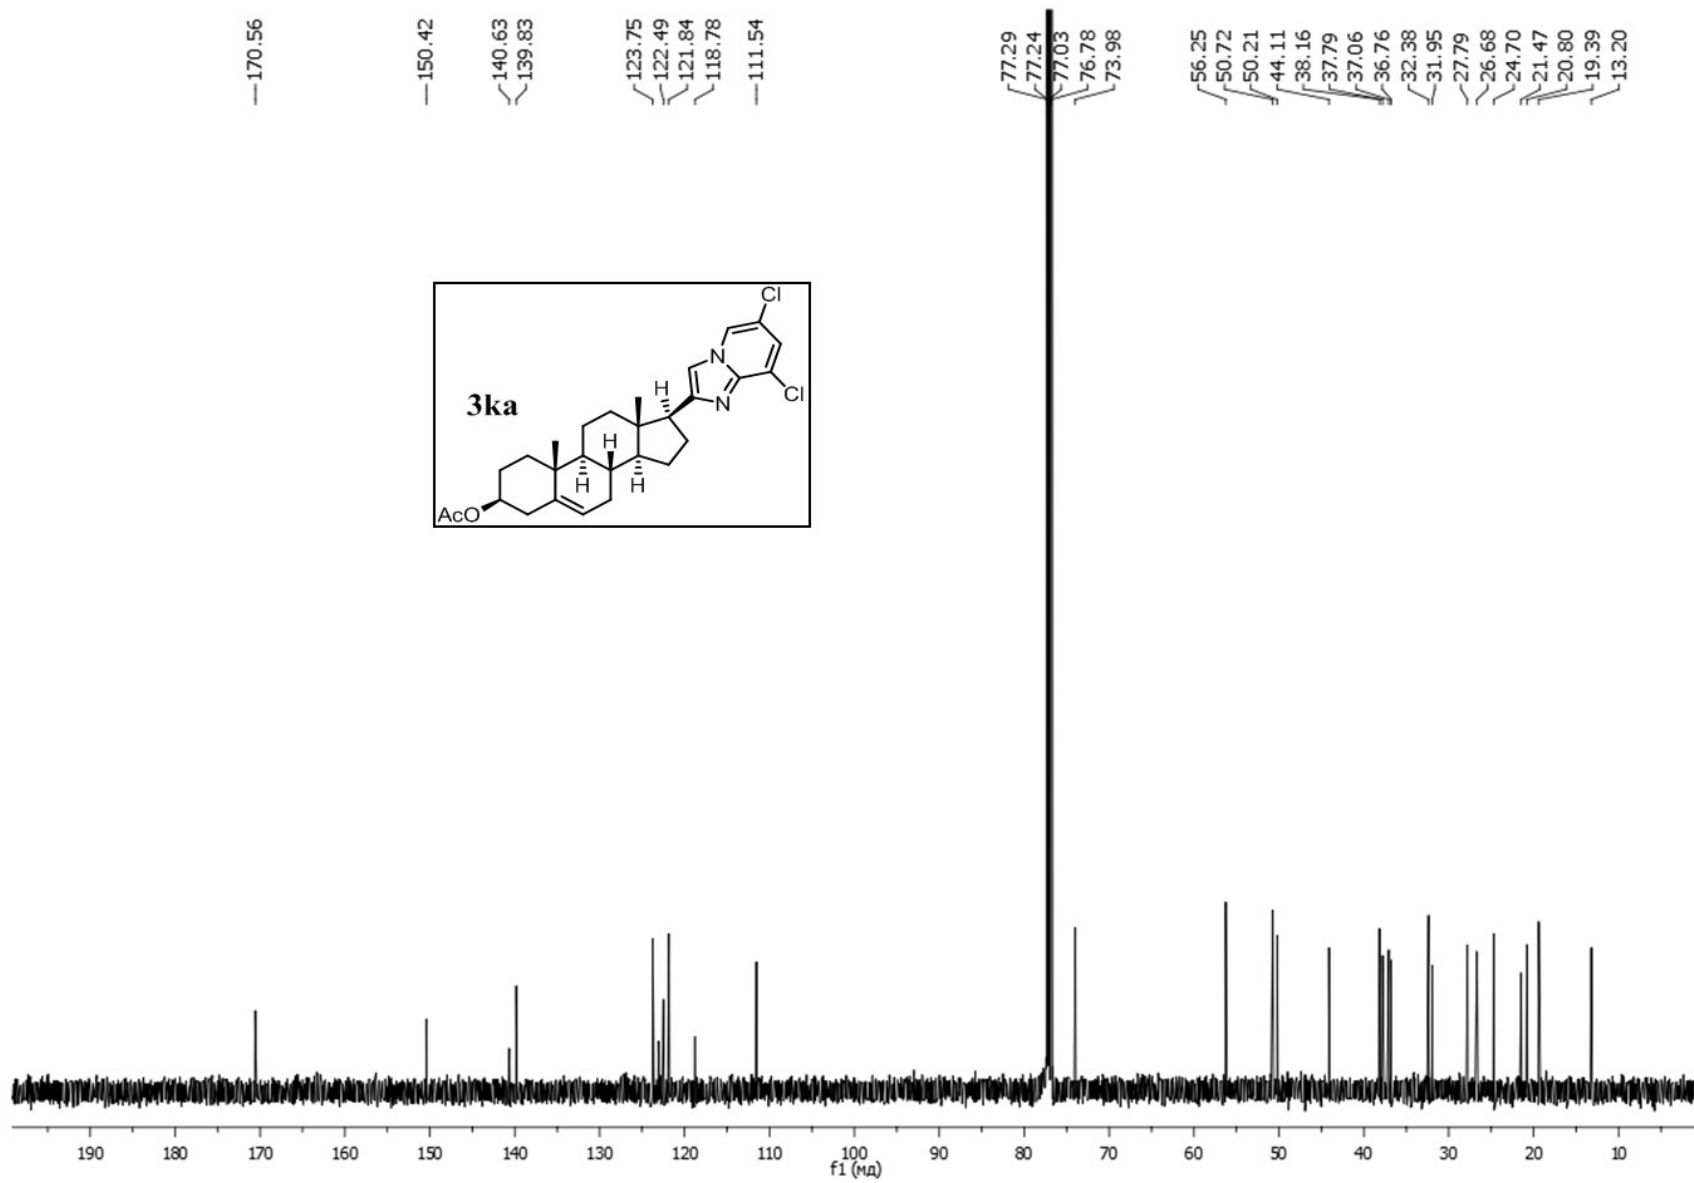

8.32  
8.10  
8.08

7.48  
7.35  
7.33  
7.28

5.40

4.62  
4.61

3.94

2.93  
2.90  
2.87

2.35  
2.13  
2.11  
2.04

1.98  
1.95  
1.90  
1.86  
1.65  
1.60  
1.41  
1.29  
1.26  
1.05

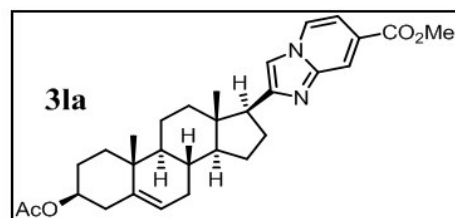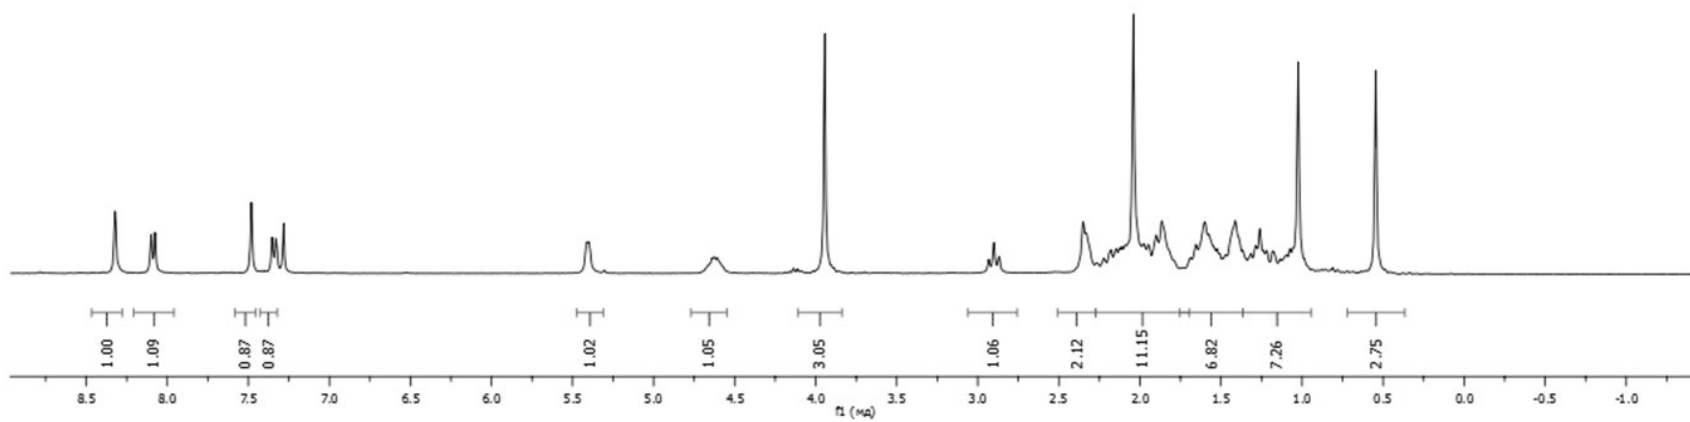

—170.47  
—165.90

—151.25  
—143.60  
—139.77

124.96  
124.51  
122.42  
119.77  
111.23  
111.02

77.45  
77.02  
76.60  
73.92

56.25  
52.40  
50.84  
50.20  
44.16  
38.11  
37.94  
37.02  
36.71  
32.29  
31.91  
27.74  
26.35  
24.65  
21.39  
20.76  
19.32  
13.12

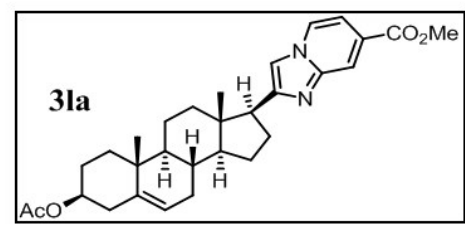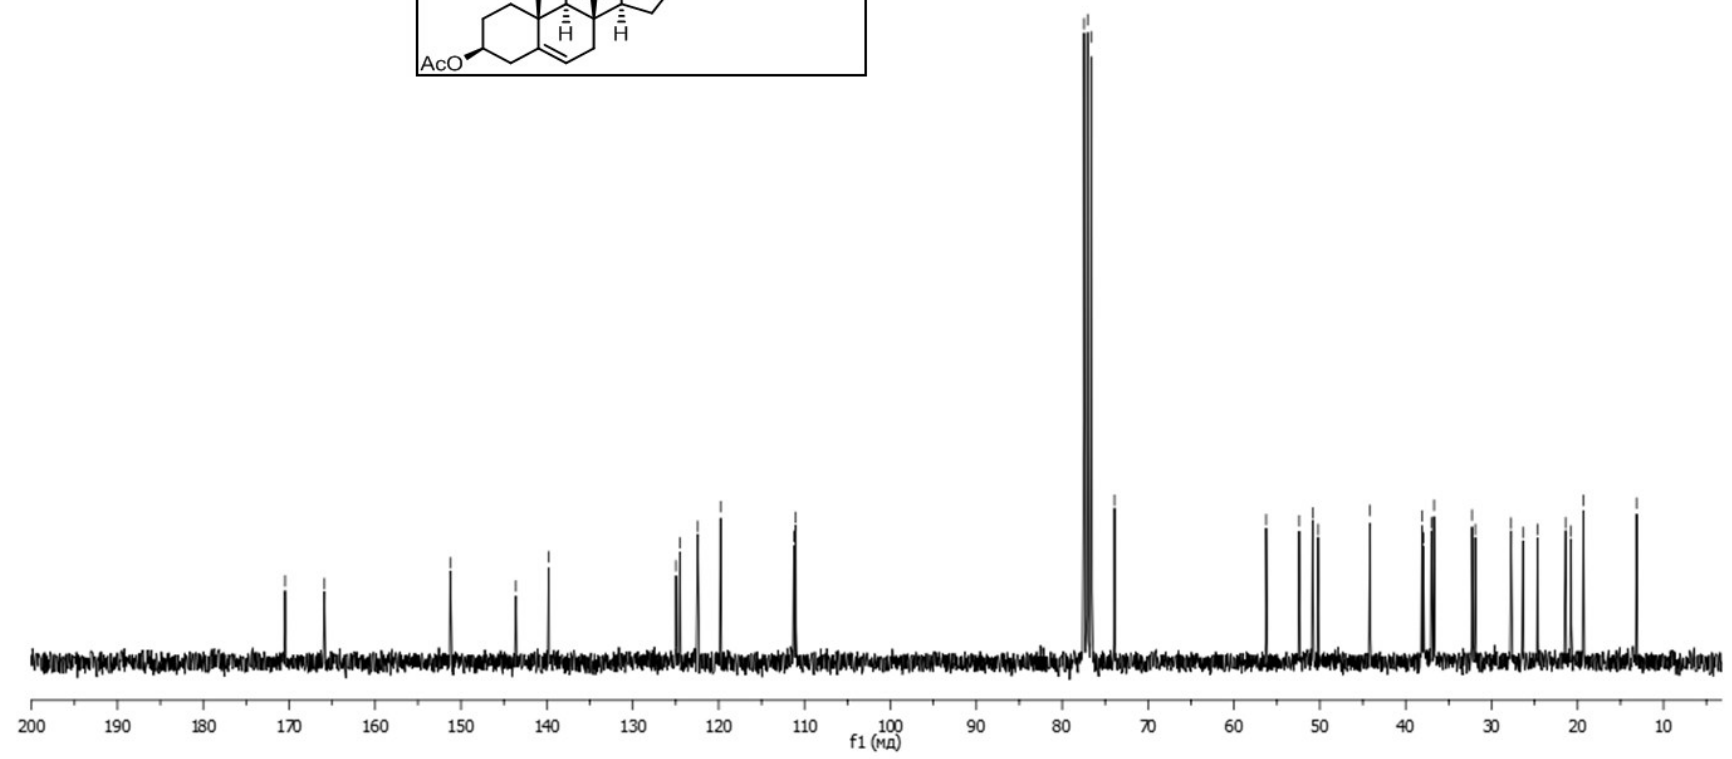

<sup>1</sup>H of VBSS-148-CF3

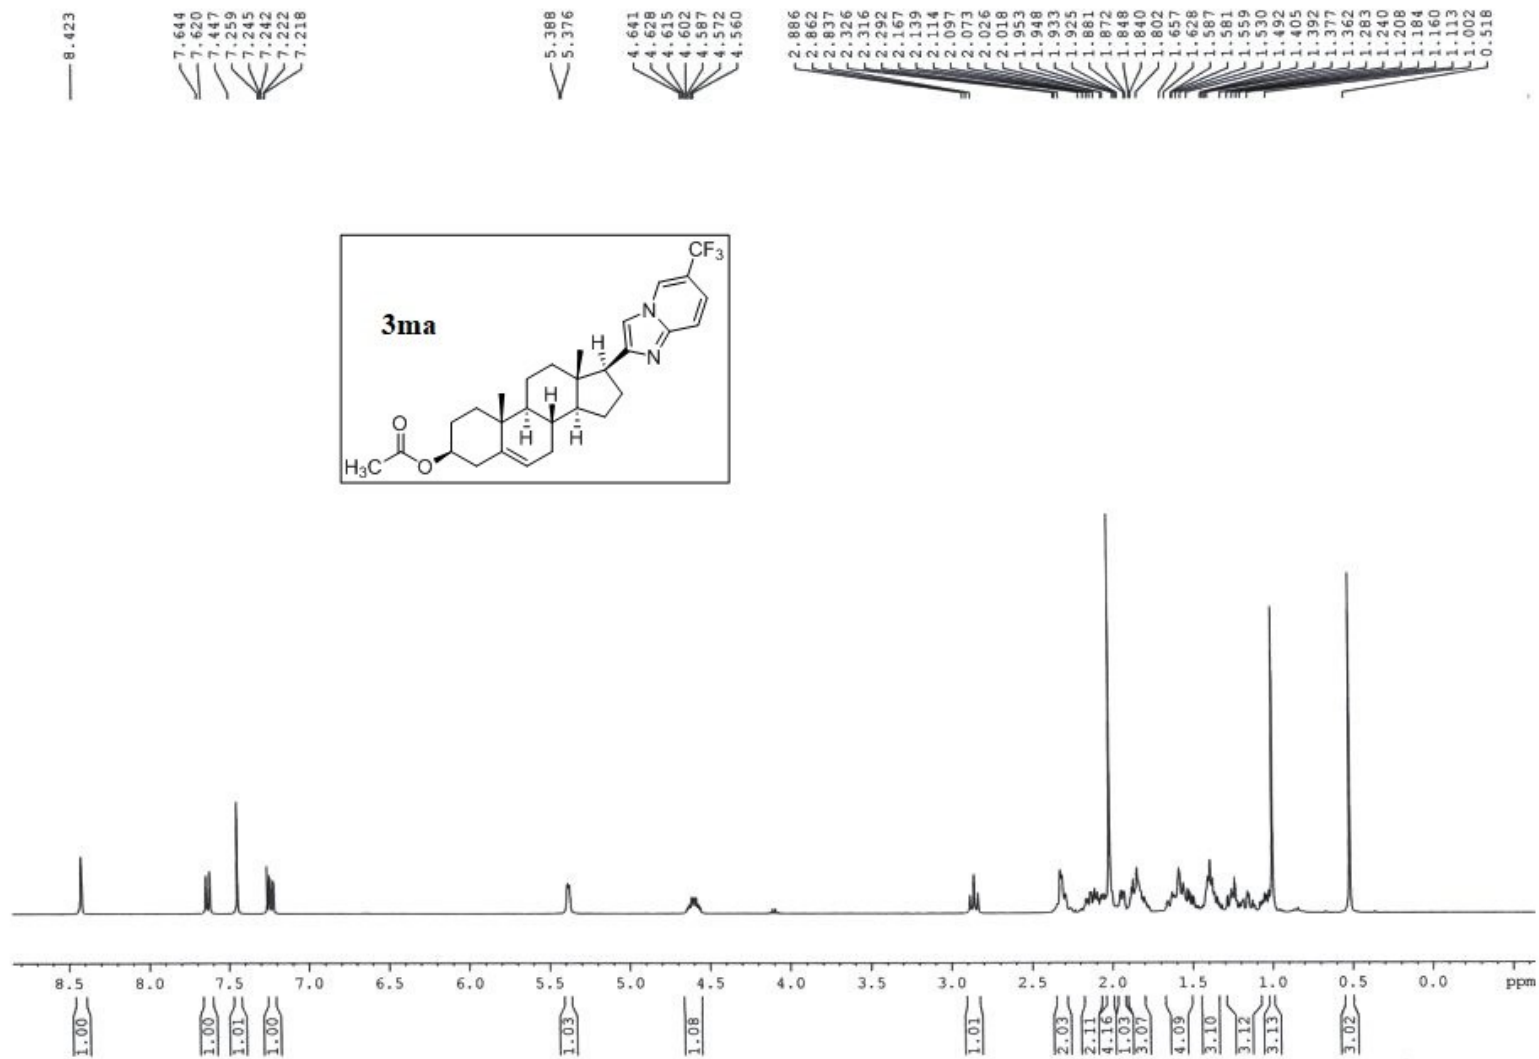

13C of vbSS-148-CF:

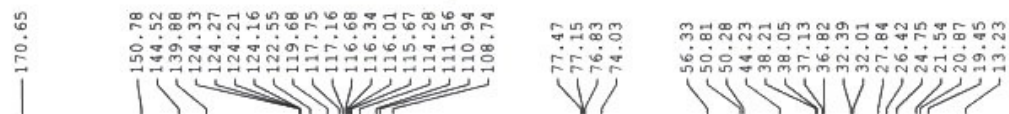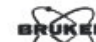

Current Data Parameters  
 NAME Dr. A HAJRA-2019-13C  
 EXPNO 81  
 PROCNO 1

F2 - Acquisition Parameters  
 Date\_ 20190219  
 Time 19.31  
 INSTRUM spect  
 PROCNO 5 mm PABBO BB/  
 PULPROG zgpg30  
 TD 32768  
 SOLVENT CDC13  
 NS 240  
 DS 2  
 SWH 24038.461 Hz  
 FIDRES 0.733596 Hz  
 AQ 0.6815744 sec  
 RG 47.25  
 DM 20.800 usec  
 DE 6.50 usec  
 TE 296.3 K  
 D1 2.00000000 sec  
 D11 0.03000000 sec  
 TD0 1

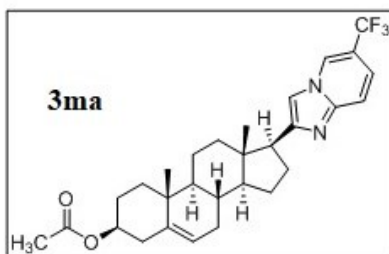

----- CHANNEL f1 -----  
 SFO1 100.6278588 MHz  
 NUC1 13C  
 P1 8.90 usec  
 PLW1 54.0000000 W

----- CHANNEL f2 -----  
 SFO2 400.1516006 MHz  
 NUC2 1H  
 CPDPRG12 waltz16  
 PCPD2 90.00 usec  
 PLW2 12.0000000 W  
 PLW12 0.32231000 W  
 PLW13 0.16212000 W

F2 - Processing parameters  
 SI 16384  
 SF 100.6177871 MHz  
 WDW EM  
 SSB 0  
 LB 1.00 Hz  
 GB 0  
 PC 1.40

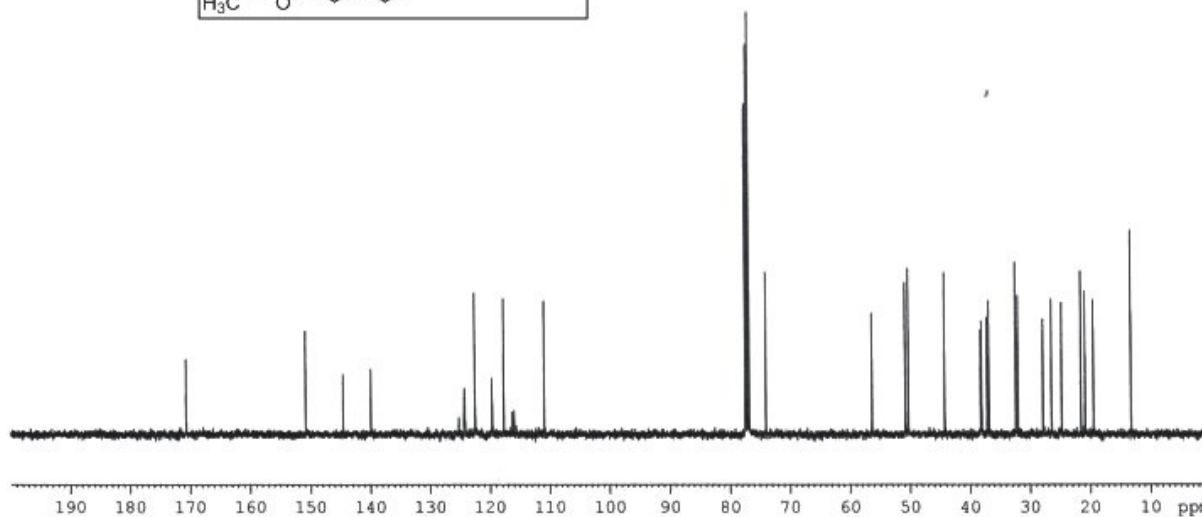

7.71  
7.68  
7.57  
7.54  
7.46  
7.43  
7.41  
7.34  
7.31  
7.28

5.43

4.64

2.85  
2.81  
2.78

2.37

2.06

1.89

1.60

1.44

1.41

1.28

1.20

1.05

0.90

0.87

0.61

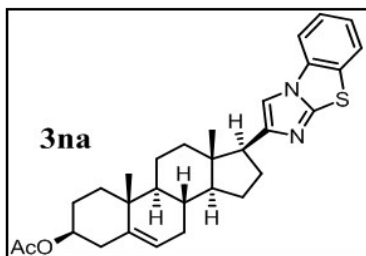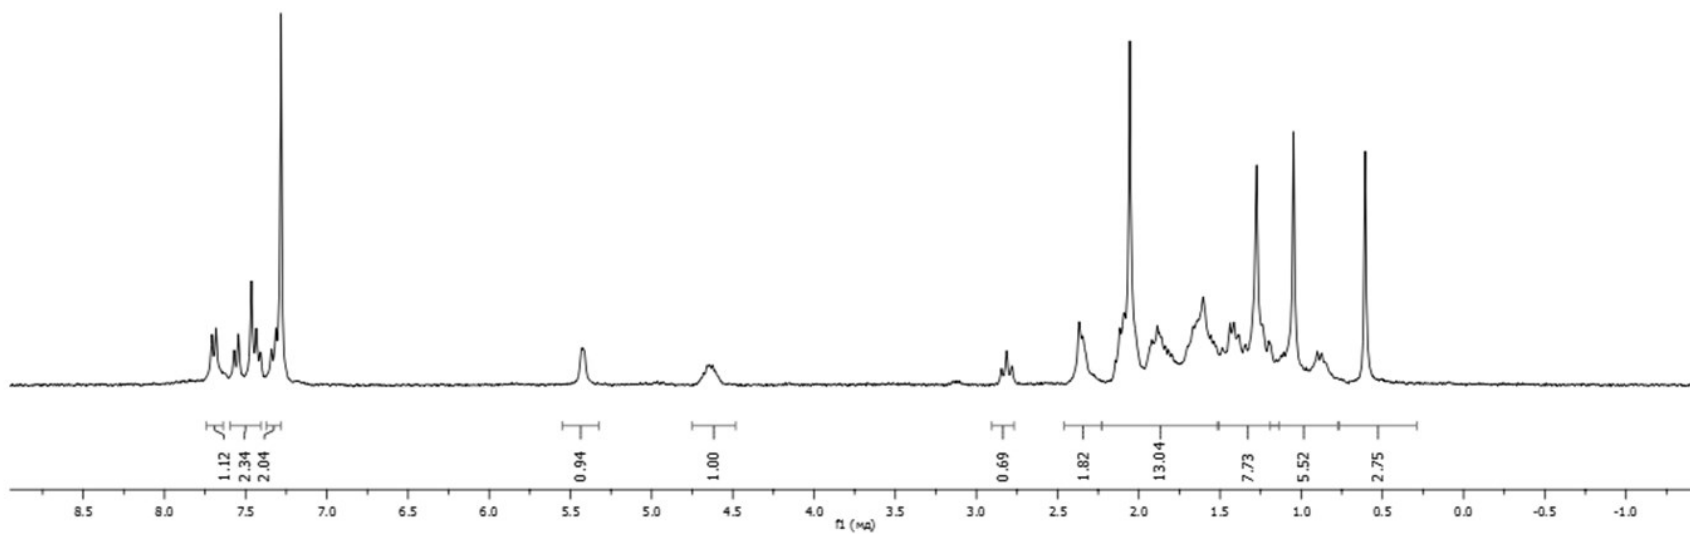



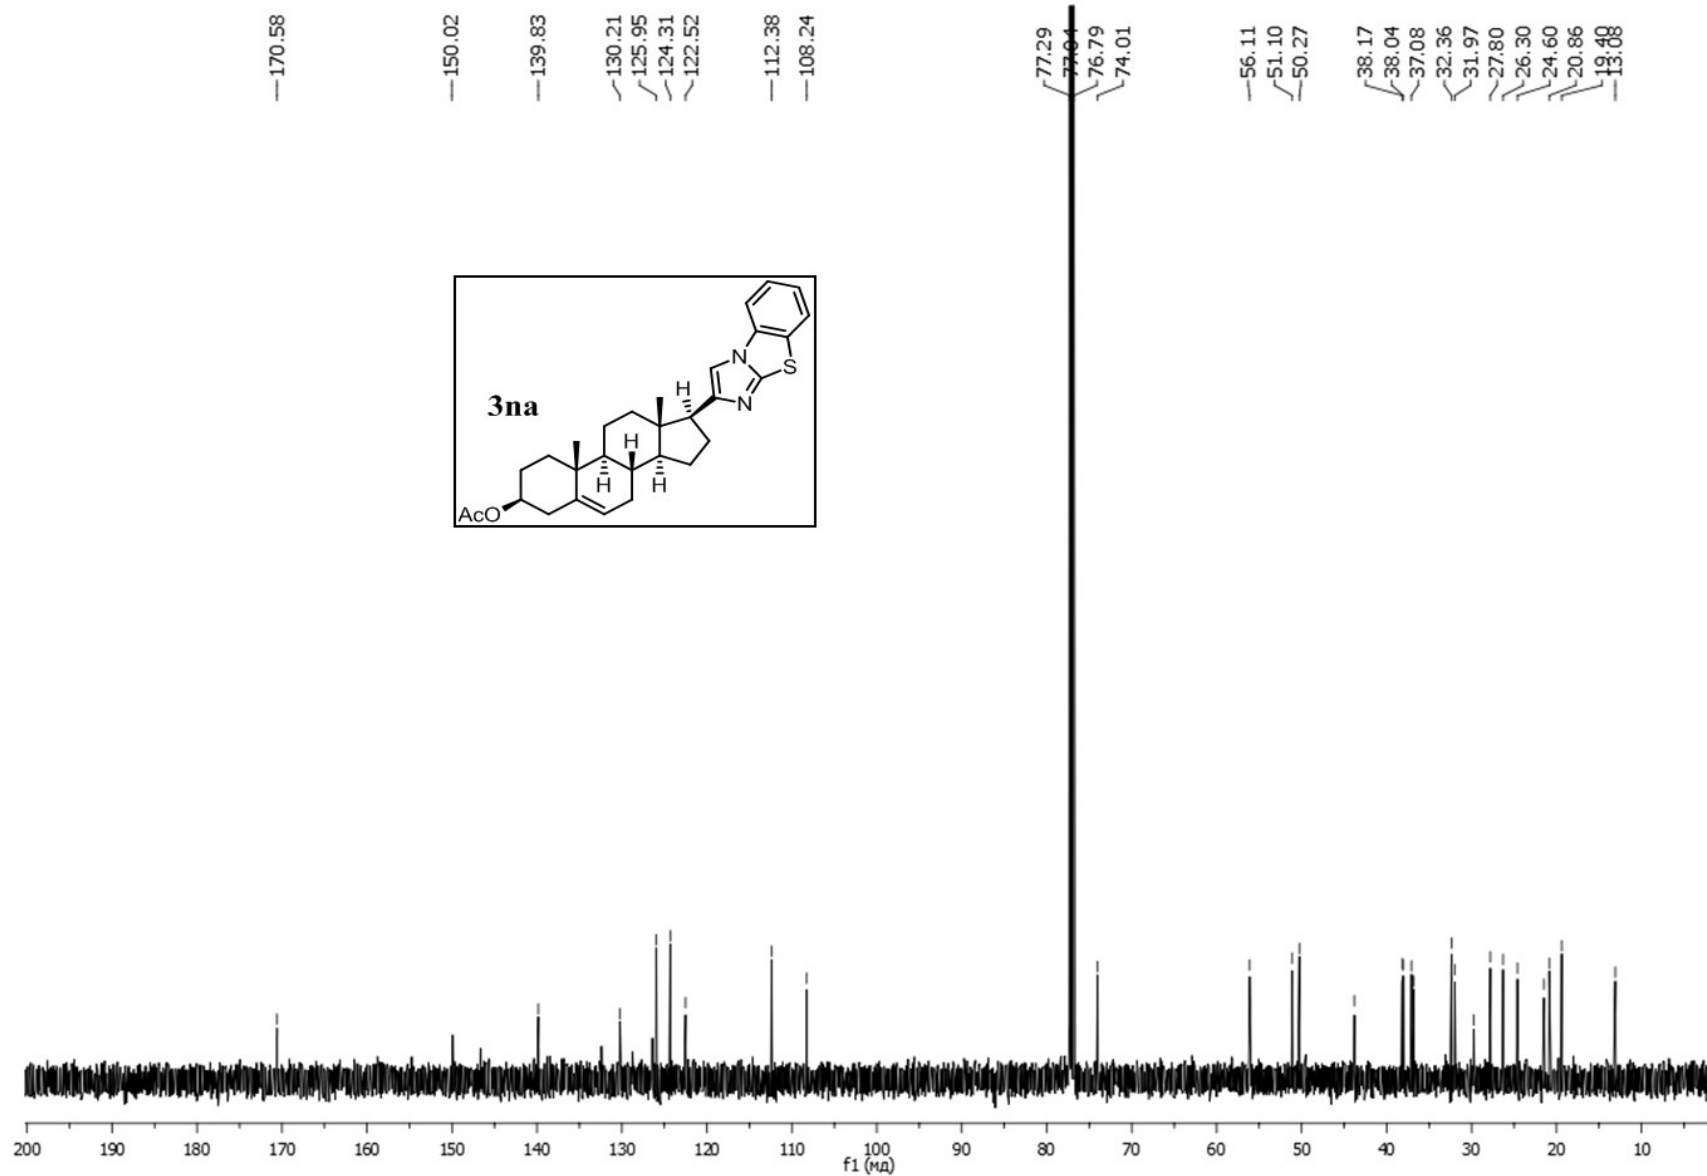

<sup>1</sup>H of VBSS-148-7

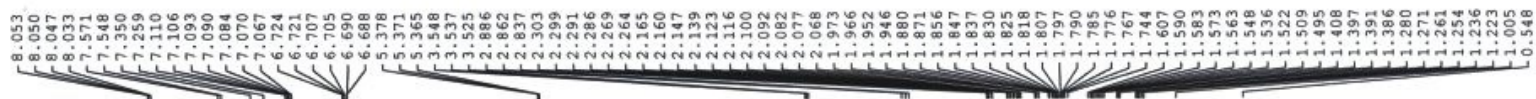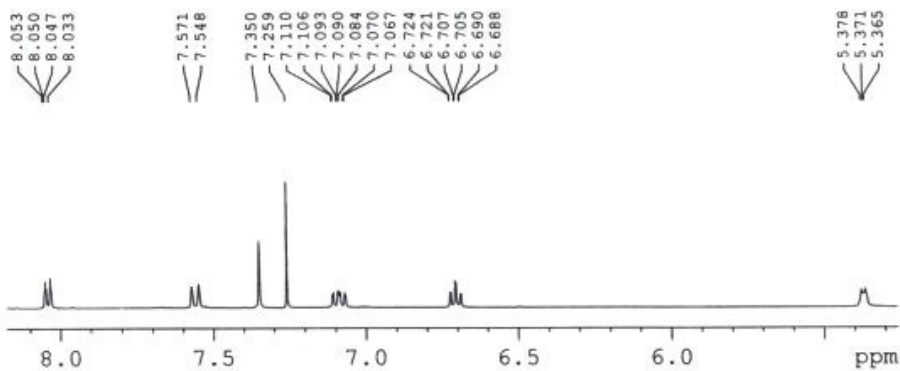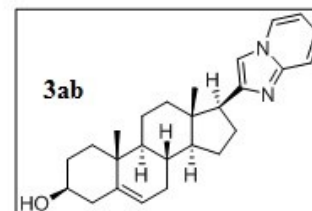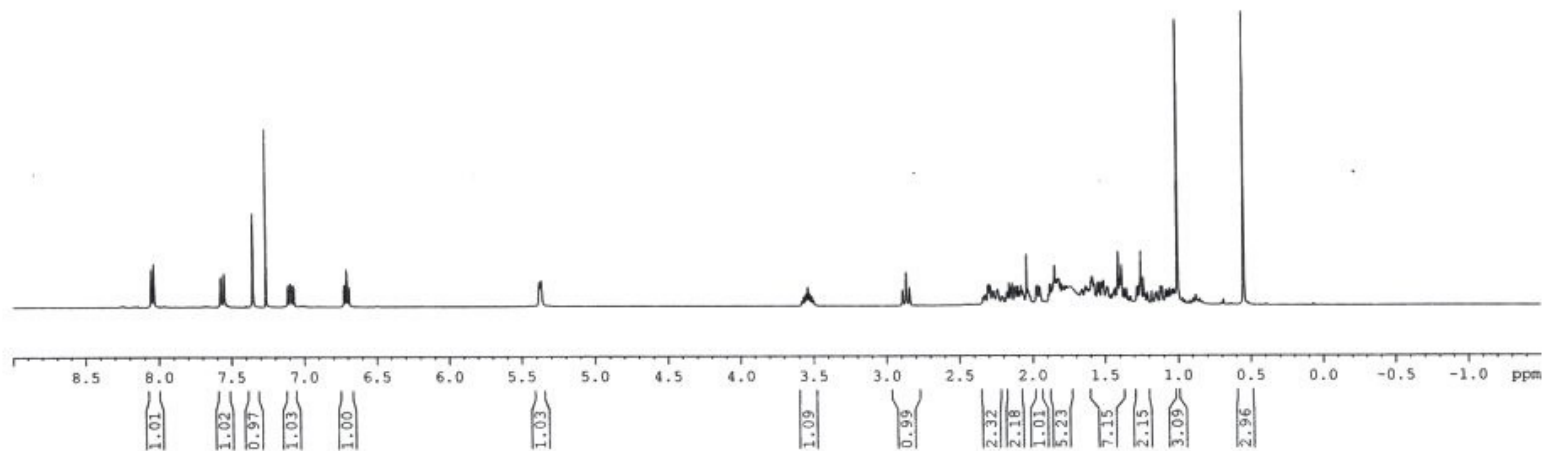

13C of VBSS-148-7

148.49  
144.84  
141.06

125.27  
123.78  
121.71  
117.26  
111.78  
109.63

77.47  
77.16  
76.84  
71.91

56.48  
50.96  
50.49  
44.10  
42.46  
38.16  
37.46  
36.80  
32.52  
32.11  
31.81  
26.63  
24.80  
20.99  
19.59  
13.26

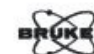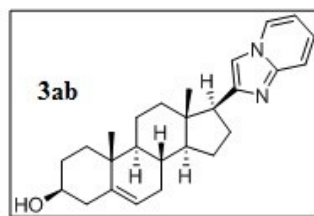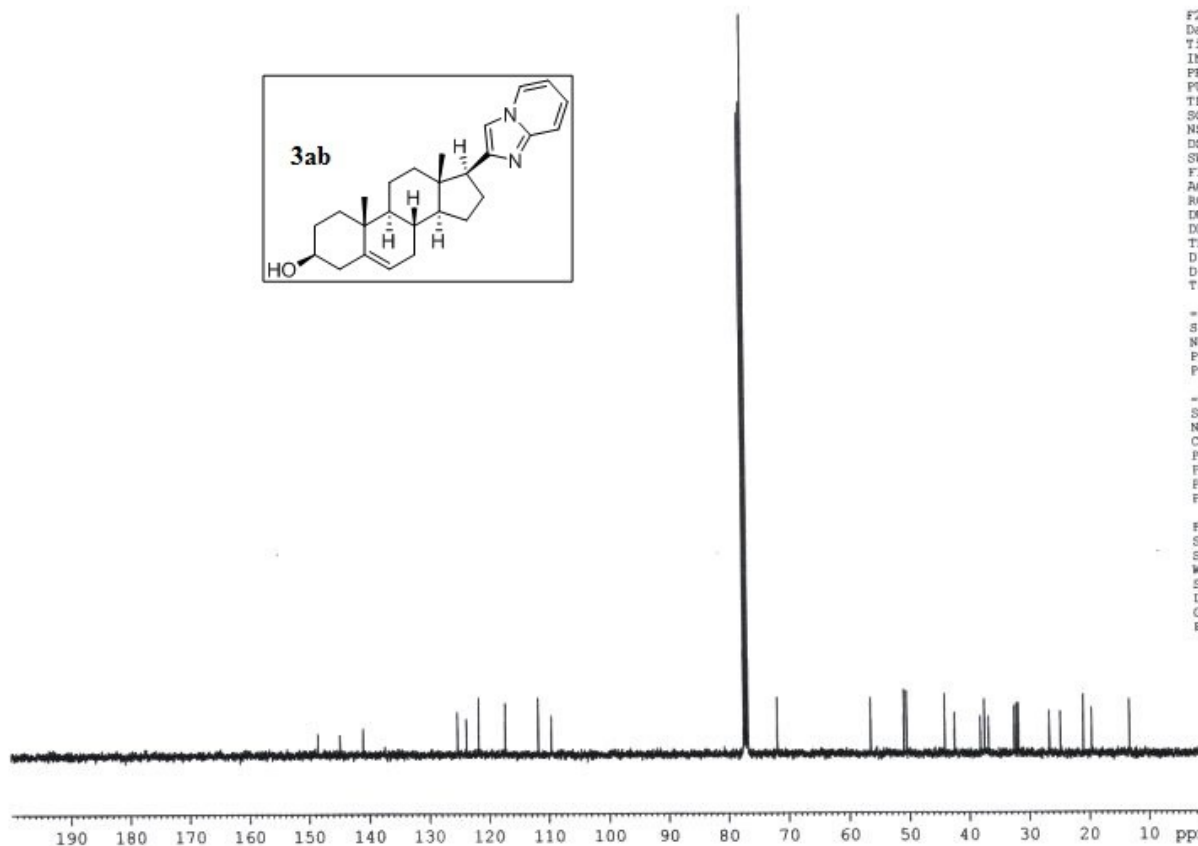

Current Data Parameters  
NAME Dr. A HAJRA 2018-2nd  
EXPNO 1429  
PROCNO 1

F2 - Acquisition Parameters  
Date\_ 20181009  
Time 23.05  
INSTRUM spect  
PROBHD 5 mm PABBO BB/  
PULPROG zgpg30  
TD 32768  
SOLVENT CDCl3  
NS 800  
DS 2  
SWH 24038.461 Hz  
FIDRES 0.733596 Hz  
AQ 0.6815744 sec  
RG 186.42  
DW 20.800 usec  
DE 6.50 usec  
TE 299.4 K  
D1 2.00000000 sec  
D11 0.03000000 sec  
TDO 1

----- CHANNEL f1 -----  
SFO1 100.6278588 MHz  
NUC1 13C  
P1 8.90 usec  
PLW1 54.00000000 W

----- CHANNEL f2 -----  
SFO2 400.1516006 MHz  
NUC2 1H  
CPCPRG12 waltz16  
PCPD2 90.00 usec  
PLW2 12.00000000 W  
PLW12 0.32231000 W  
PLW13 0.16212000 W

F2 - Processing parameters  
SI 16384  
SF 100.6177835 MHz  
WOW EM  
SSB 0  
LB 1.00 Hz  
GB 0  
PC 1.40

<sup>1</sup>H of VBSS-148-2

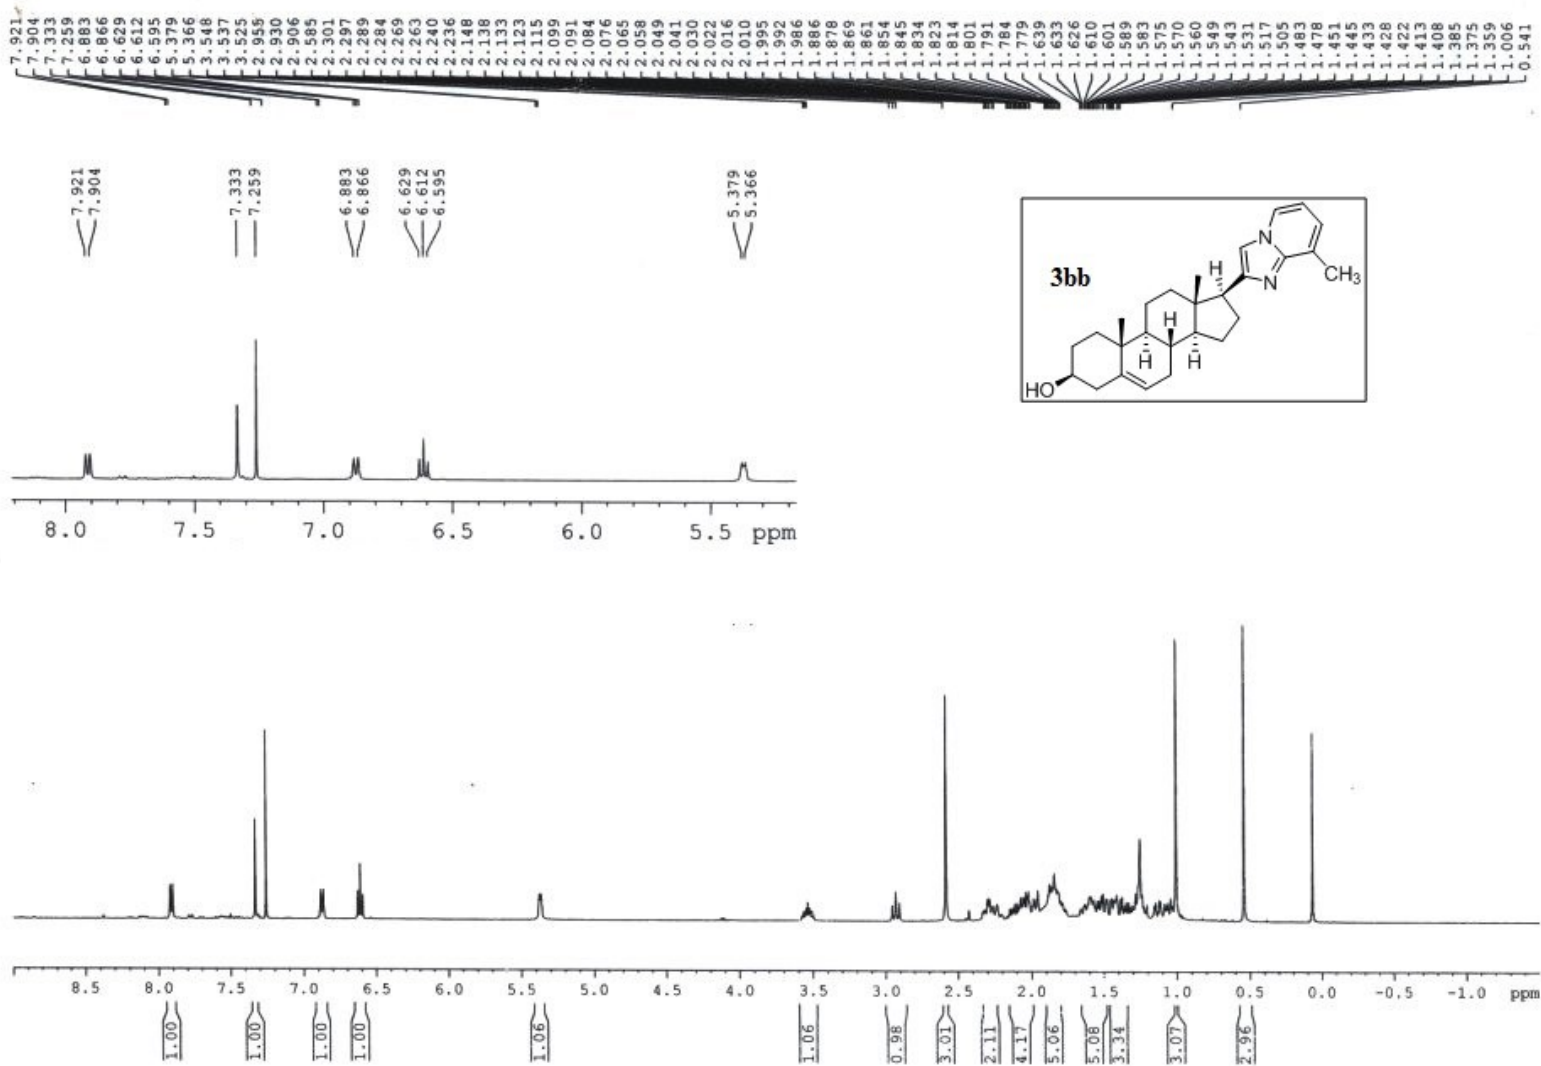

<sup>13</sup>C of VBSS-148-2

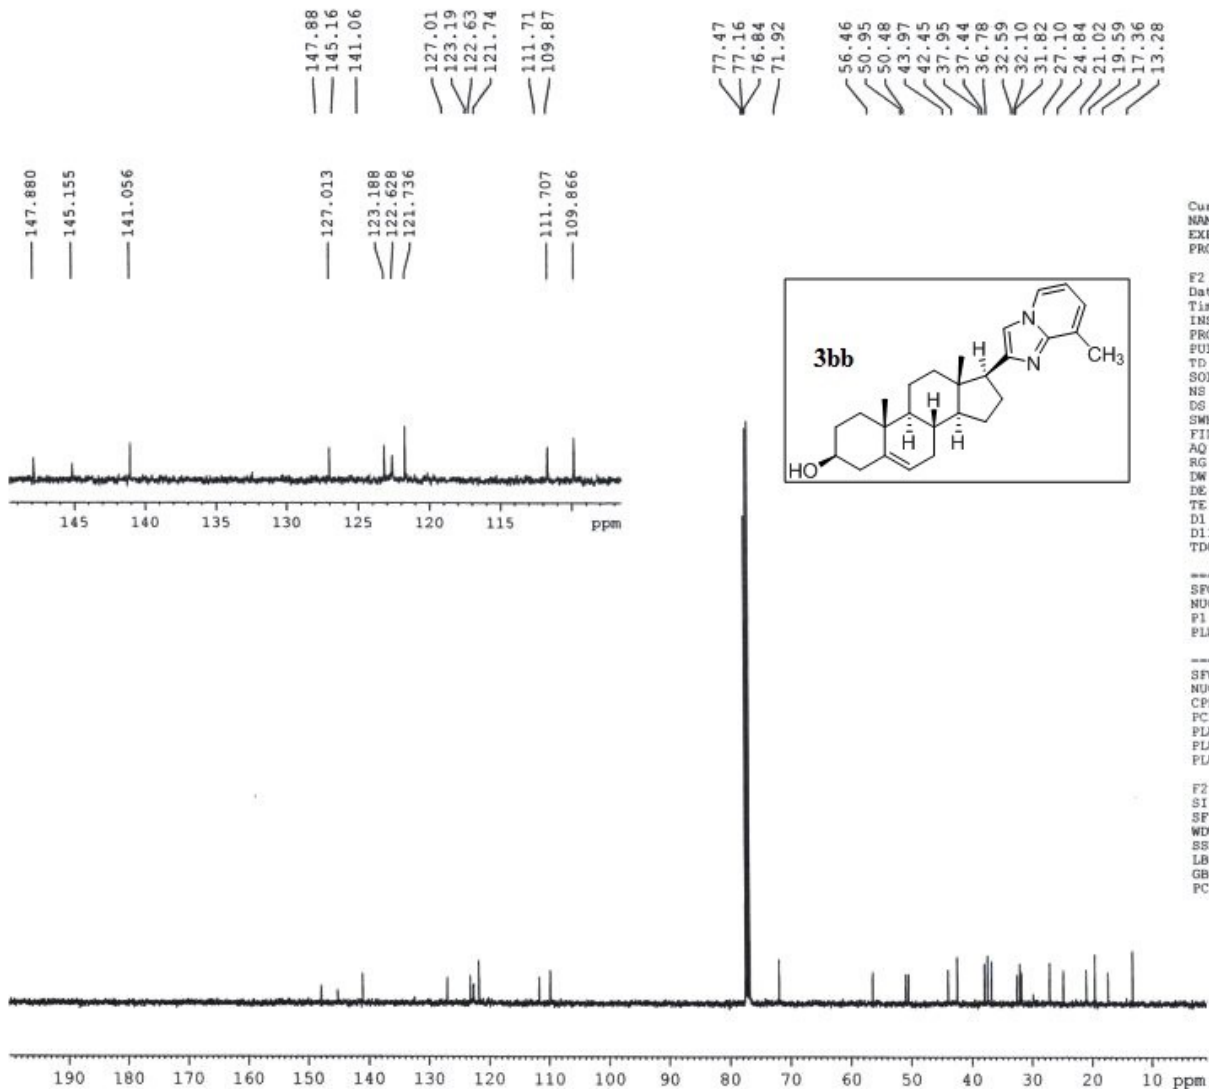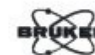

Current Data Parameters  
 NAME Dr. A HAJRA 2018-2nd  
 EXPNO 1451  
 PROCNO 1

F2 - Acquisition Parameters  
 Date 20181012  
 Time 17.34  
 INSTRUM spect  
 FROBHD 5 mm PABBO BB/  
 FULPROG zgpg30  
 TD 32768  
 SOLVENT CDCl3  
 NS 800  
 DS 2  
 SMH 24038.461 Hz  
 FIDRES 0.733596 Hz  
 AQ 0.6815744 sec  
 RG 120.16  
 DW 20.800 usec  
 DE 6.50 usec  
 TE 298.7 K  
 D1 2.00000000 sec  
 D11 0.03000000 sec  
 TD0 1

----- CHANNEL f1 -----  
 SFO1 100.6278588 MHz  
 NUC1 <sup>13</sup>C  
 P1 8.90 usec  
 PLM1 54.00000000 W

----- CHANNEL f2 -----  
 SFO2 400.1516006 MHz  
 NUC2 <sup>1</sup>H  
 CPDPRG2 waltz16  
 PCPD2 90.00 usec  
 PLW2 12.00000000 W  
 PLW12 0.32231000 W  
 PLW13 0.16212000 W

F2 - Processing parameters  
 SI 16384  
 SF 100.6177838 MHz  
 WSW EM  
 SSB 0  
 LB 1.00 Hz  
 GB 0  
 PC 1.40

<sup>1</sup>H of VBSS-148-21

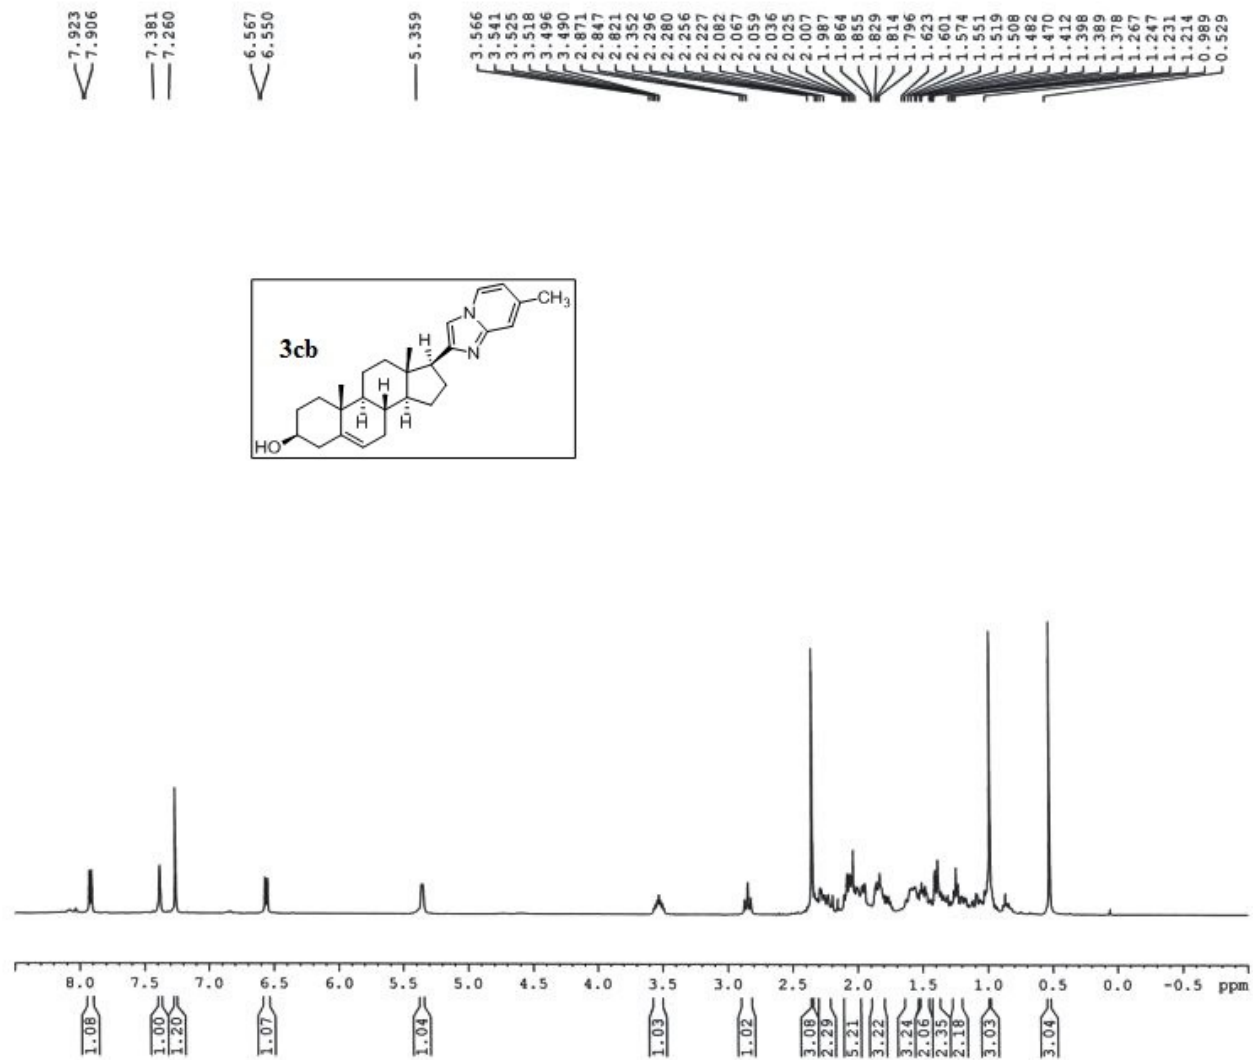

13C of VBSS 148-21

147.98  
145.26  
141.08  
135.00  
124.53  
121.63  
115.66  
114.59  
109.01

77.47  
77.16  
76.84  
71.83

56.40  
50.96  
50.42  
44.01  
42.43  
38.22  
37.43  
36.76  
32.49  
32.06  
31.79  
26.78  
24.74  
21.44  
20.96  
19.57  
13.27

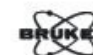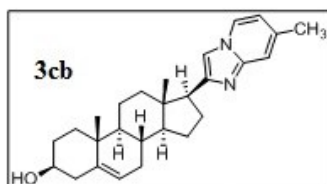

Current Data Parameters  
NAME Dr.A.HAJRA 2017  
EXPNO 2213  
PROCNO 1

F2 - Acquisition Parameters  
Date\_ 20171226  
Time 10.32  
INSTRUM spect  
PROBRD 5 mm PABBO BB/  
PULPROG zgdc  
TD 32768  
SOLVENT CDCL3  
NS 440  
DS 2  
SWH 24038.461 Hz  
FIDRES 0.733596 Hz  
AQ 0.6815744 sec  
RG 186.42  
DW 20.800 usec  
DE 6.50 usec  
TE 296.0 K  
D1 2.00000000 sec  
D11 0.03000000 sec  
TD0 1

----- CHANNEL f1 -----  
SFO1 100.6278588 MHz  
NUC1 13C  
P1 8.90 usec  
PLW1 54.00000000 W

----- CHANNEL f2 -----  
SFO2 400.1516006 MHz  
NUC2 1H  
PCPDPRG2 waltz16  
PCPD2 90.00 usec  
PLW2 12.00000000 W  
PLW12 0.32231000 W

F2 - Processing parameters  
SI 16384  
SF 100.6177858 MHz  
WDW EM  
SSB 0  
LB 1.00 Hz  
GB 0  
PC 1.00

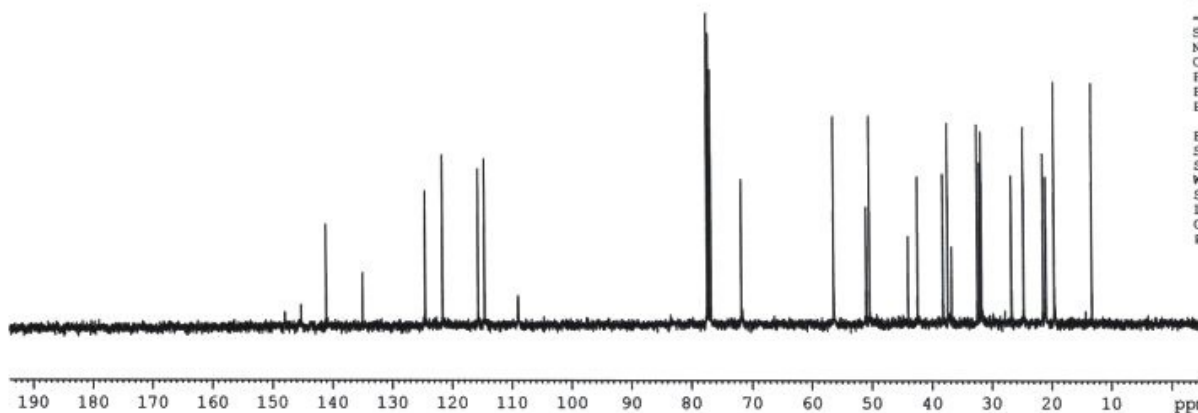

<sup>1</sup>H of VBSS-148-app-3

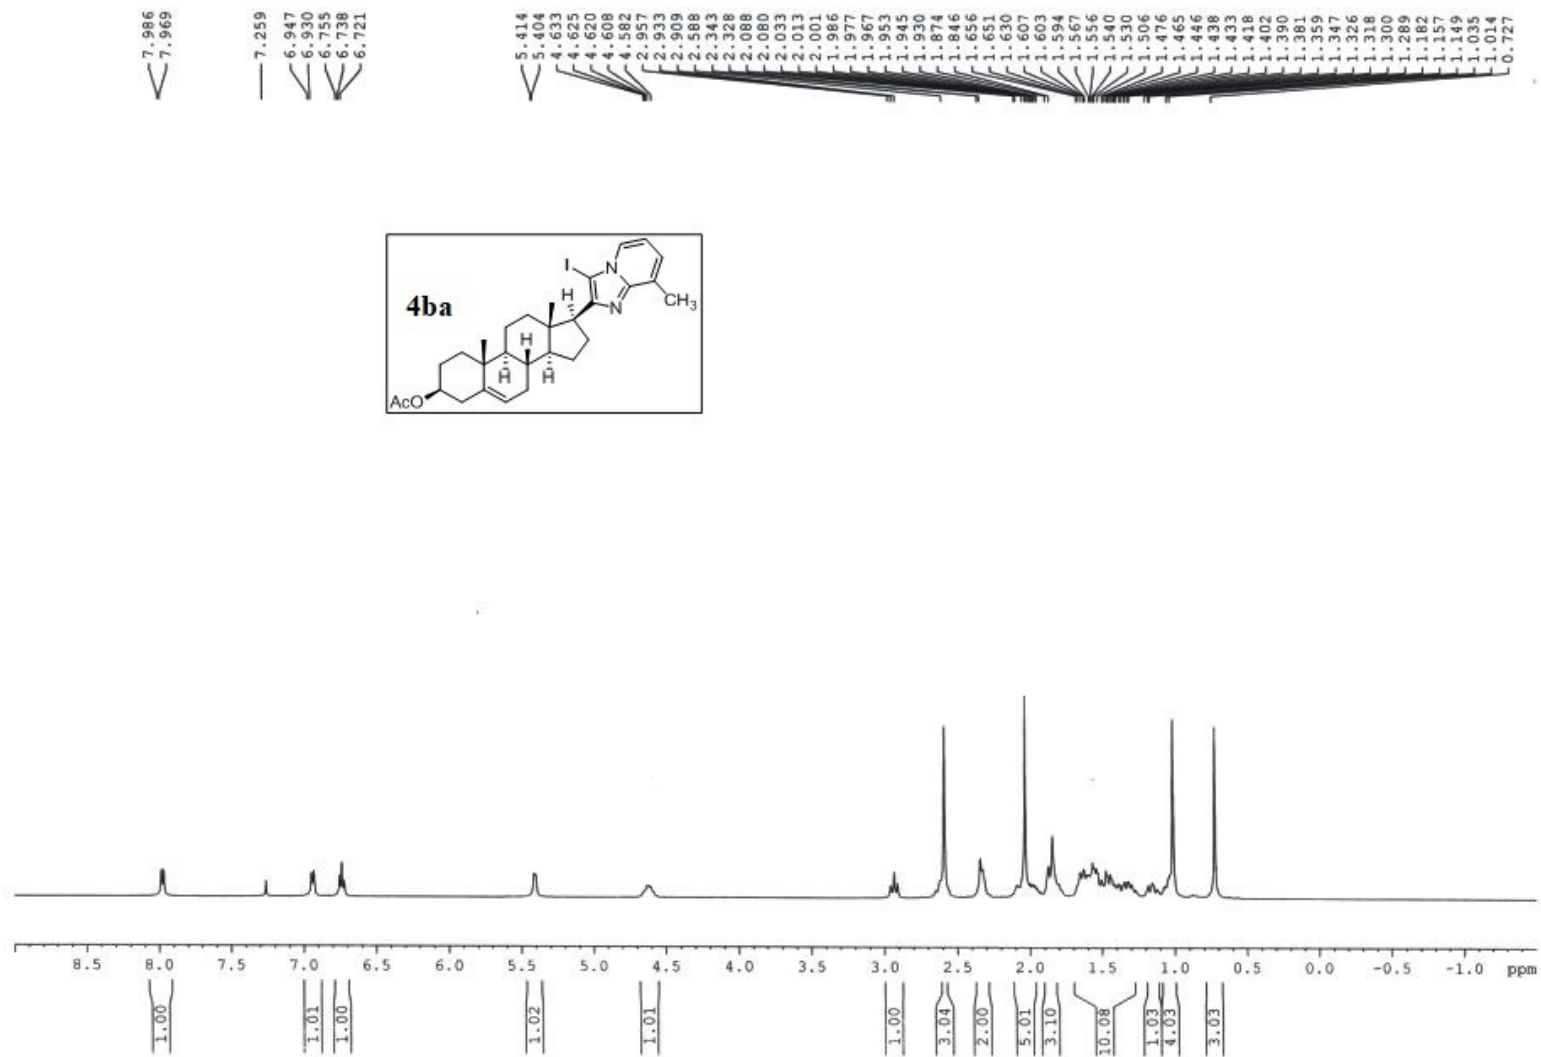



13C of vbSS-148-app-3

— 170.68  
— 150.47  
— 147.89  
— 139.88  
— 127.33  
— 124.01  
— 123.12  
— 122.74  
— 112.30  
77.48  
77.17  
76.85  
74.11  
56.74  
50.43  
49.88  
46.27  
38.96  
38.28  
37.19  
36.88  
32.34  
32.13  
27.93  
26.90  
25.06  
21.58  
21.02  
19.50  
16.73  
13.53

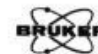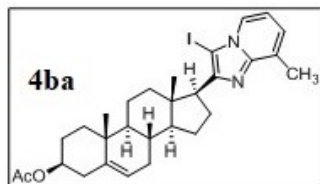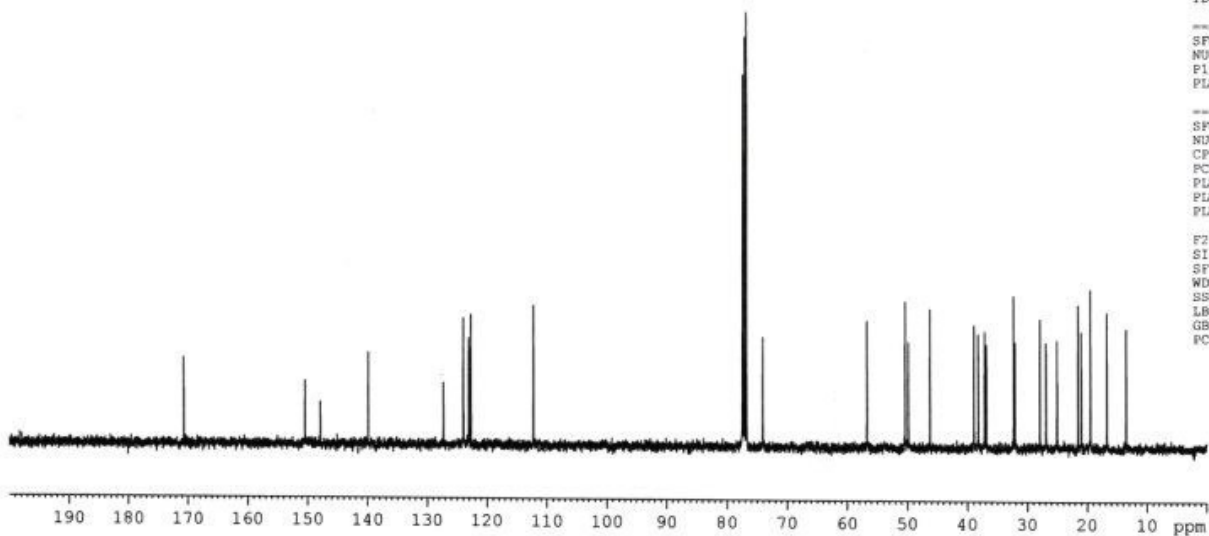

Current Data Parameters  
NAME Dr. A HAJRA 2018-2nd  
EXPNO 1397  
PROCNO 1

F2 - Acquisition Parameters  
Date\_ 20181006  
Time 11.44  
INSTRUM spect  
PROBHD 5 mm FAPBO BB/  
PULPROG zgpg30  
TD 32768  
SOLVENT CDCl3  
NS 320  
DS 2  
SWH 24038.461 Hz  
FIDRES 0.733596 Hz  
AQ 0.6815744 sec  
RG 186.42  
DW 20.800 usec  
DE 6.50 usec  
TE 299.6 K  
D1 2.00000000 sec  
D11 0.03000000 sec  
TD0 1

----- CHANNEL f1 -----  
SFO1 100.6278588 MHz  
NUC1 13C  
P1 8.90 usec  
PLW1 54.00000000 W

----- CHANNEL f2 -----  
SFO2 400.1516006 MHz  
NUC2 1H  
CPDPRG2 waltz16  
PCPD2 90.00 usec  
PLW2 12.00000000 W  
PLW12 0.32231000 W  
PLW13 0.16212000 W

F2 - Processing parameters  
SI 16384  
SF 100.6177843 MHz  
WDW EM  
SSB 0  
LB 1.00 Hz  
GB 0  
PC 1.40

<sup>1</sup>H of VBSS-148-app-5

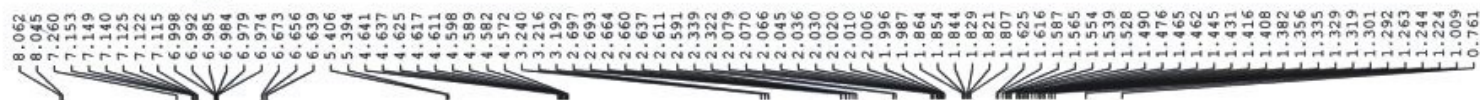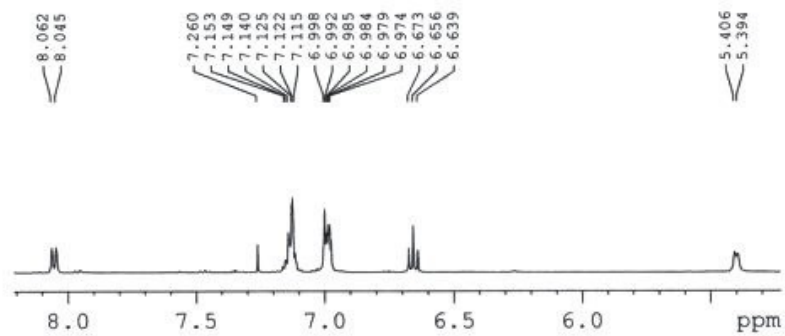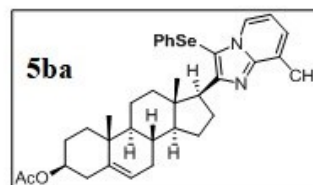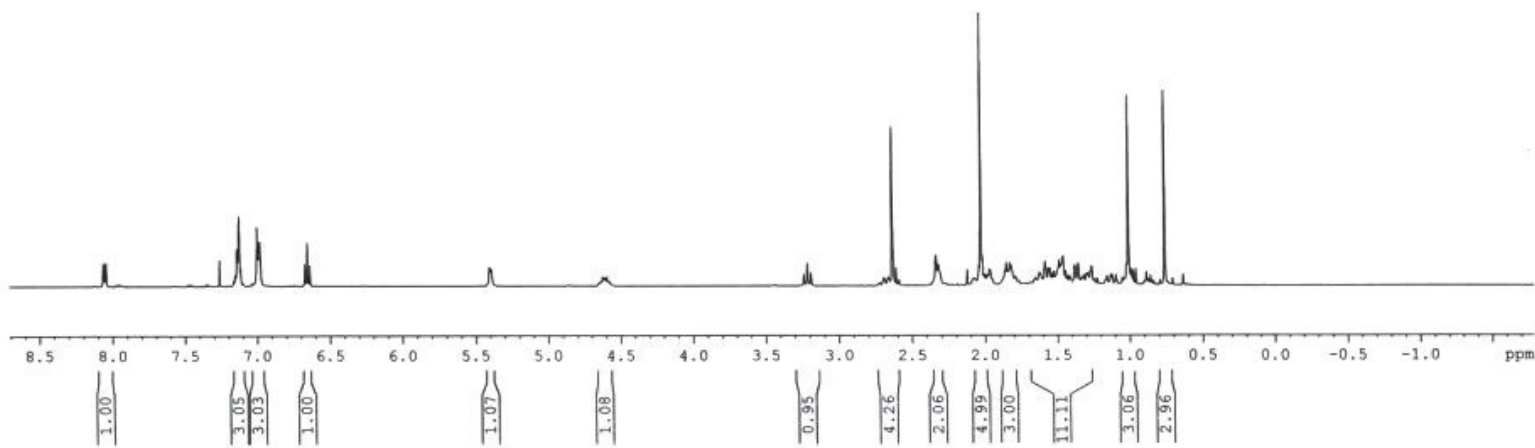

13C of vbSS-148-apj

170.64  
 154.38  
 147.79  
 139.84  
 131.76  
 129.49  
 128.09  
 127.24  
 126.32  
 124.15  
 123.15  
 122.72  
 112.16  
 105.51  
 77.47  
 77.15  
 76.83  
 74.09  
 56.78  
 50.38  
 49.54  
 45.43  
 38.24  
 38.03  
 37.14  
 36.83  
 32.33  
 32.11  
 27.88  
 27.12  
 25.07  
 21.55  
 20.95  
 19.47  
 17.05  
 13.57

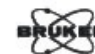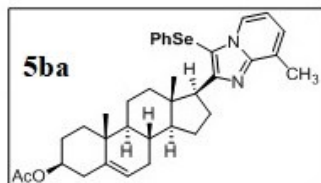

Current Data Parameters  
 NAME Dr. A HAJRA 2018-2nd  
 EXPNO 1406  
 PROCNO 1

F2 - Acquisition Parameters  
 Date\_ 20181007  
 Time 14.06  
 INSTRUM spect  
 PROBHD 5 mm FAPBO BB/  
 PULPROG zgpg30  
 TD 32768  
 SOLVENT CDCl3  
 NS 120  
 DS 2  
 SWH 24038.461 Hz  
 FIDRES 0.733596 Hz  
 AQ 0.6815744 sec  
 RG 93.46  
 DW 20.800 usec  
 DE 6.50 usec  
 TE 299.1 K  
 D1 2.00000000 sec  
 D11 0.03000000 sec  
 TDO 1

----- CHANNEL f1 -----  
 SFO1 100.6278588 MHz  
 NUC1 13C  
 P1 8.90 usec  
 PLW1 54.00000000 W

----- CHANNEL f2 -----  
 SFO2 400.1516006 MHz  
 NUC2 1H  
 CPDPRG12 waltz16  
 PCPD2 90.00 usec  
 PLW2 12.00000000 W  
 PLW12 0.32231000 W  
 PLW13 0.16212000 W

F2 - Processing parameters  
 SI 16384  
 SF 100.6177873 MHz  
 WDW EM  
 SSB 0  
 LB 1.00 Hz  
 GB 0  
 PC 1.40

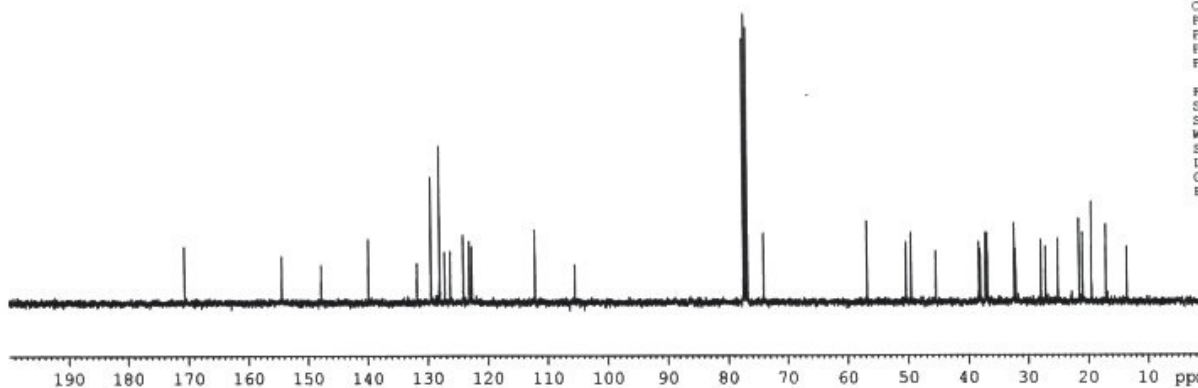

<sup>77</sup>Se of VBSS-148-app-5

—194.55

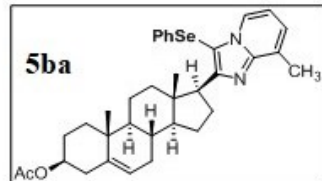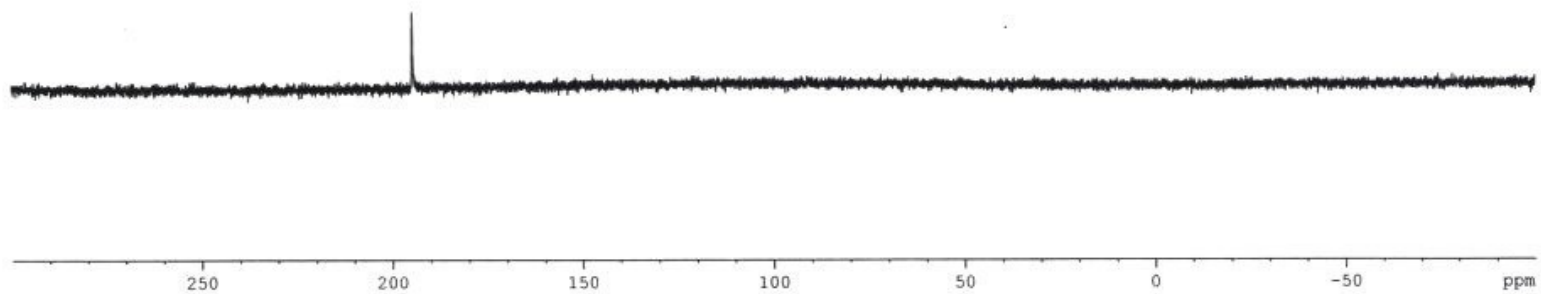

<sup>1</sup>H of VBSS-148-6

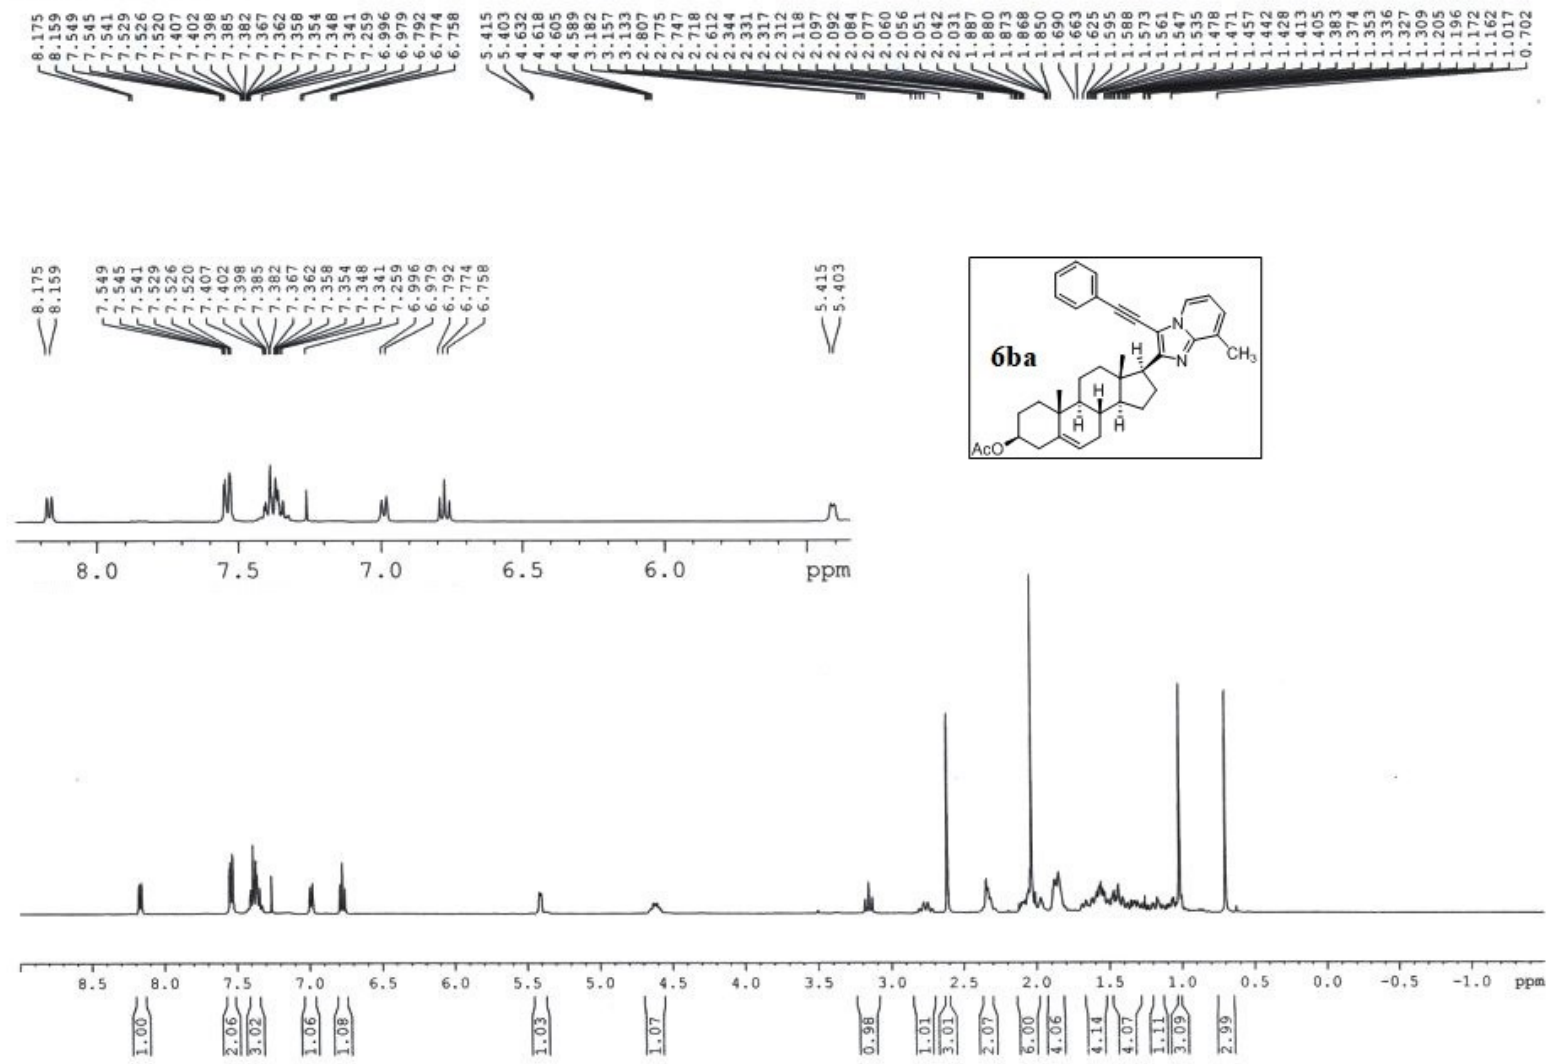

13C of VBSS-148-6

170.66  
 152.23  
 145.02  
 139.88  
 130.98  
 128.61  
 128.27  
 127.21  
 124.12  
 123.43  
 122.71  
 112.39  
 107.00  
 100.47  
 78.86  
 77.47  
 77.15  
 76.83  
 74.11  
 56.56  
 50.87  
 50.34  
 46.25  
 38.34  
 38.25  
 37.16  
 36.86  
 32.42  
 32.14  
 27.89  
 25.79  
 25.15  
 21.55  
 20.99  
 19.47  
 17.16  
 13.56

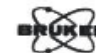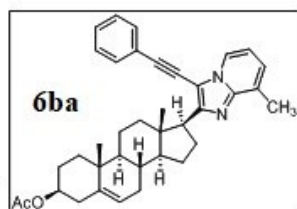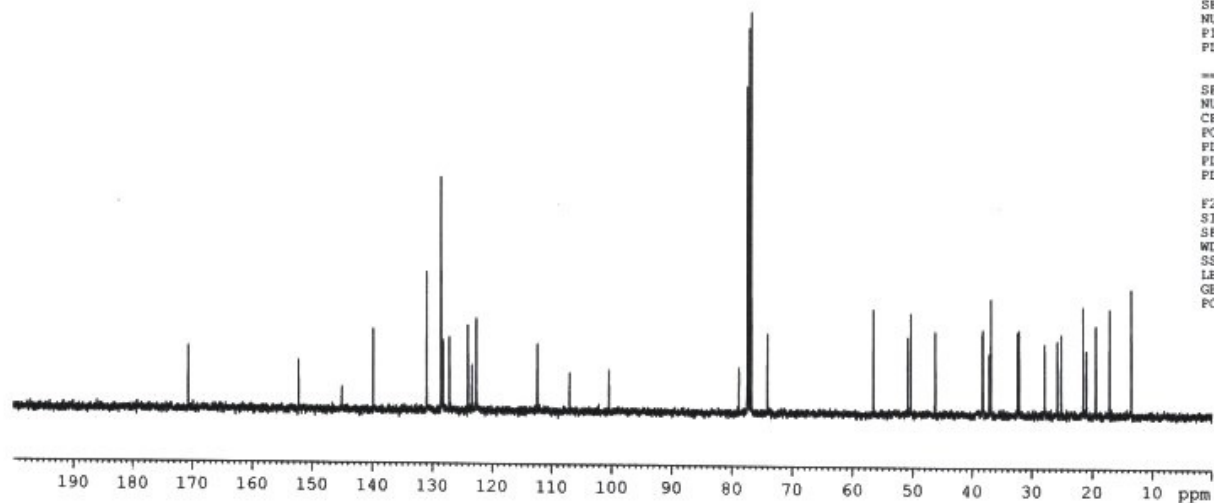

Current Data Parameters  
 NAME Dr. A HAURA 2018-2nd  
 EXPRNO 1453  
 PROCNO 1

F2 - Acquisition Parameters  
 Date\_ 20181012  
 Time 17.50  
 INSTRUM spect  
 PROBHD 5 mm PABBO BB/  
 PULPROG zgpg30  
 TD 32768  
 SOLVENT CDCl3  
 NS 180  
 DS 2  
 SWH 24038.461 Hz  
 FIDRES 0.733596 Hz  
 AQ 0.6815744 sec  
 RG 120.16  
 DW 20.800 usec  
 DE 6.50 usec  
 TE 298.7 K  
 D1 2.00000000 sec  
 D11 0.03000000 sec  
 TD0 1

----- CHANNEL f1 -----  
 SFO1 100.6278588 MHz  
 NUC1 13C  
 P1 8.90 usec  
 PLW1 54.00000000 W

----- CHANNEL f2 -----  
 SFO2 400.1516006 MHz  
 NUC2 1H  
 CPDPRG[2] waltz16  
 PCPD2 90.00 usec  
 PLW2 12.00000000 W  
 PLW12 0.32231000 W  
 PLW13 0.16212000 W

F2 - Processing parameters  
 SI 16384  
 SF 100.6177873 MHz  
 WDW EM  
 SSB 0  
 LB 1.00 Hz  
 GB 0  
 PC 1.40
